# Supplementary material
Source: publisher figshare collection journal article supplement (https://sage.figshare.com/ndownloader/files/20066132)

disease 1

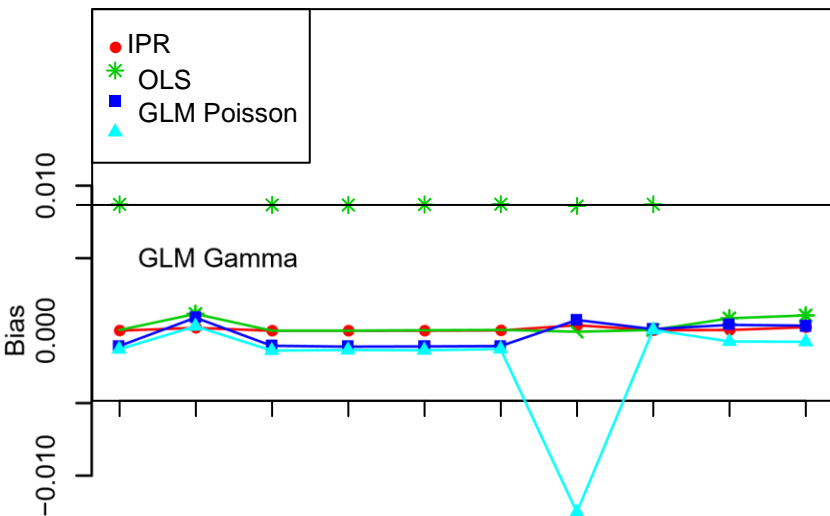

disease 1

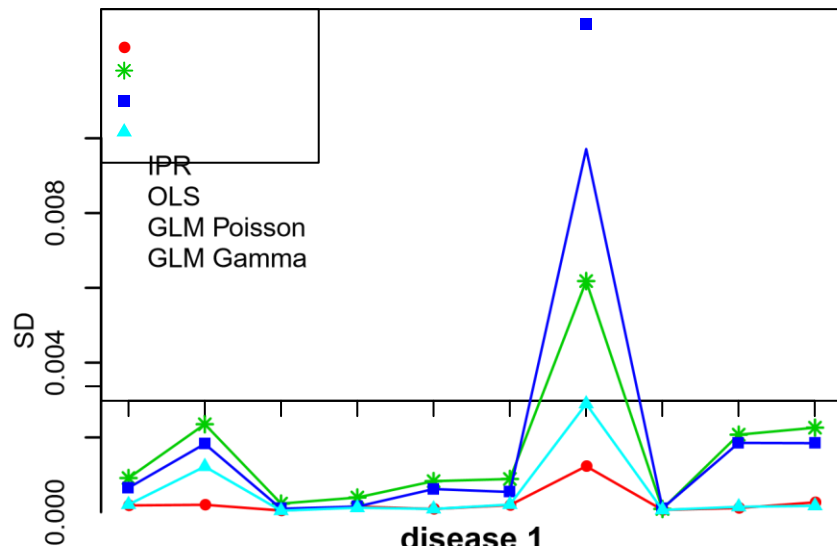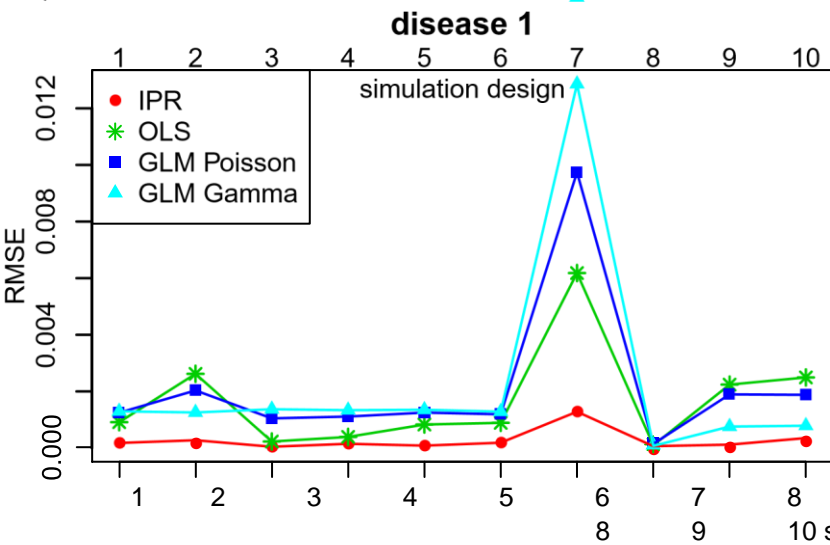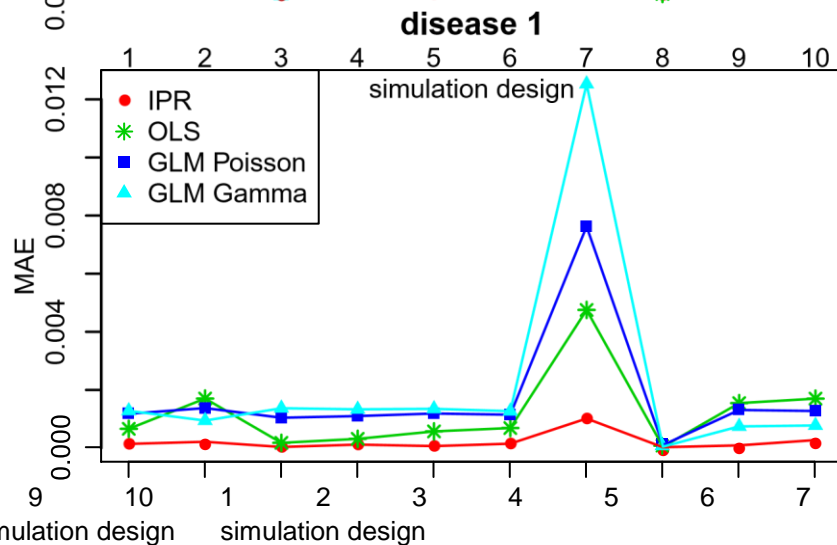

disease 2

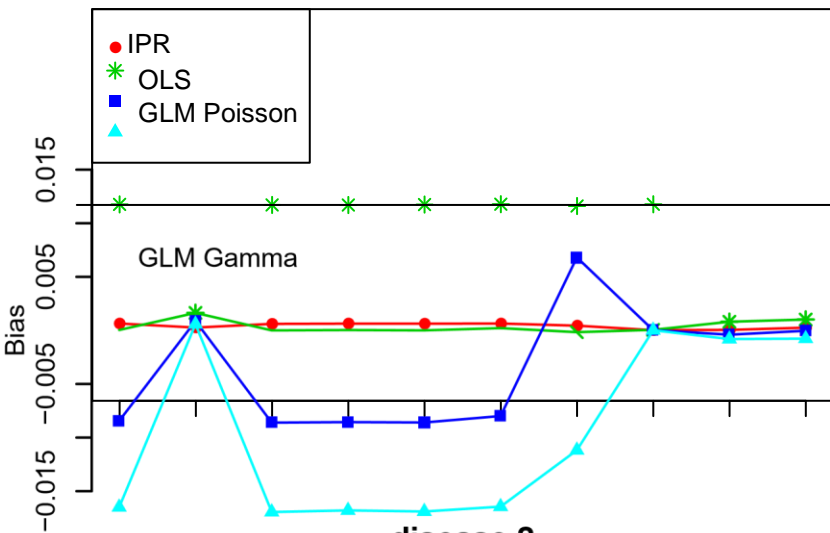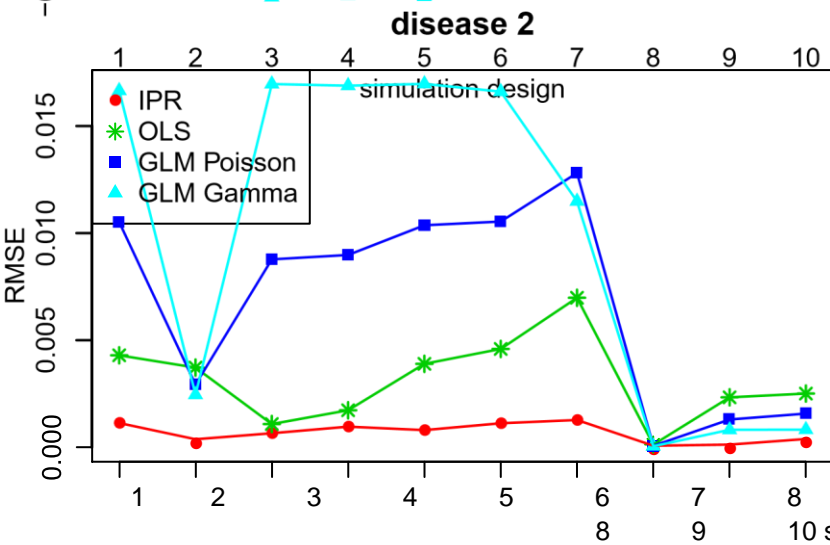

disease 2

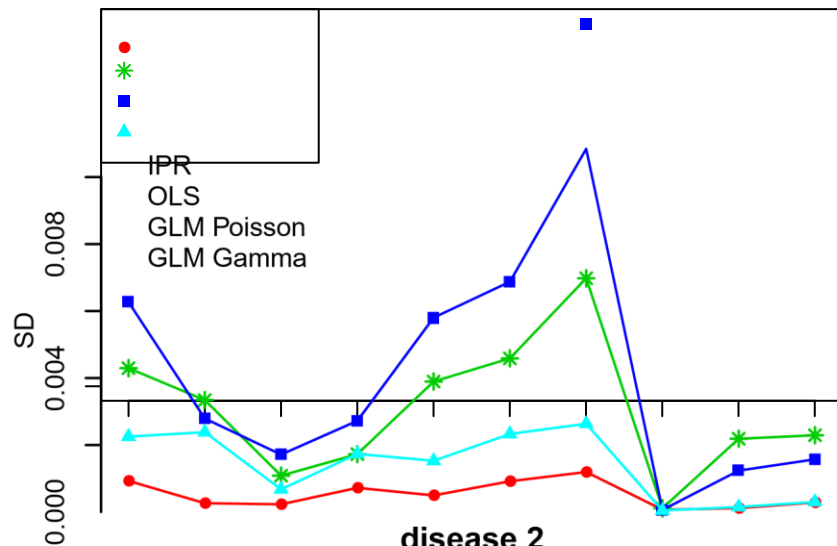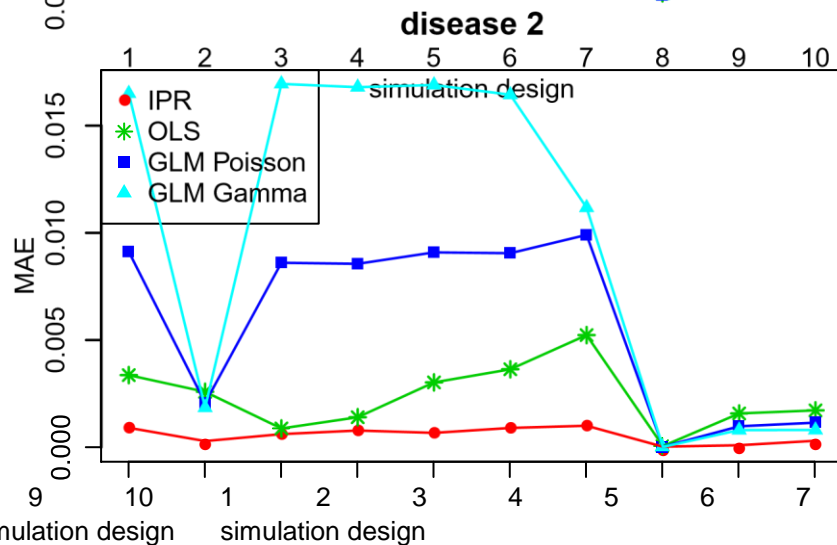

disease 3

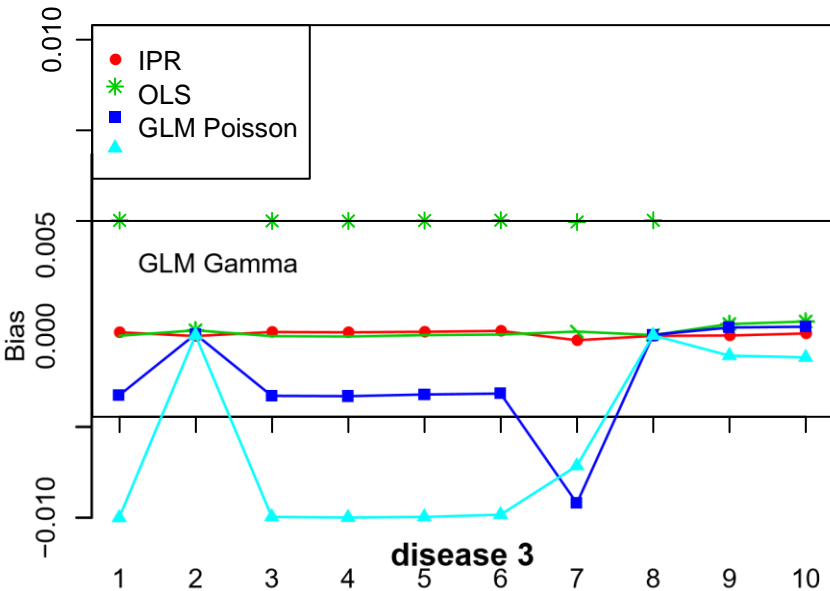

disease 3

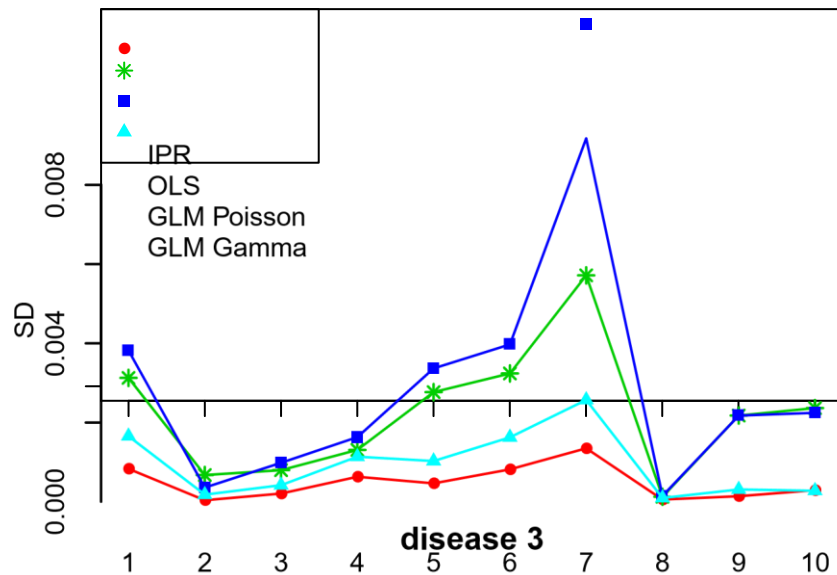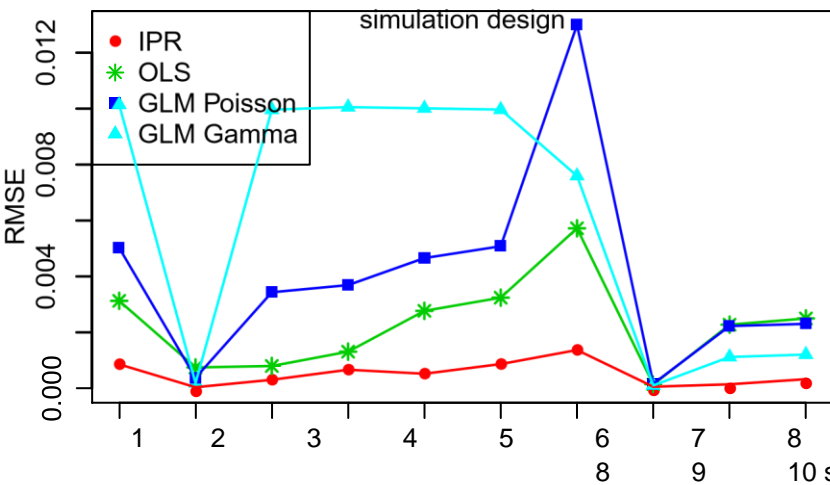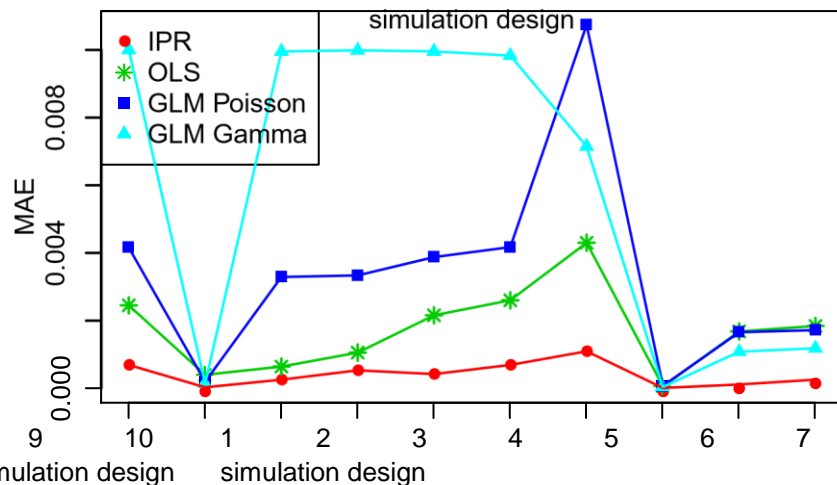

disease 4

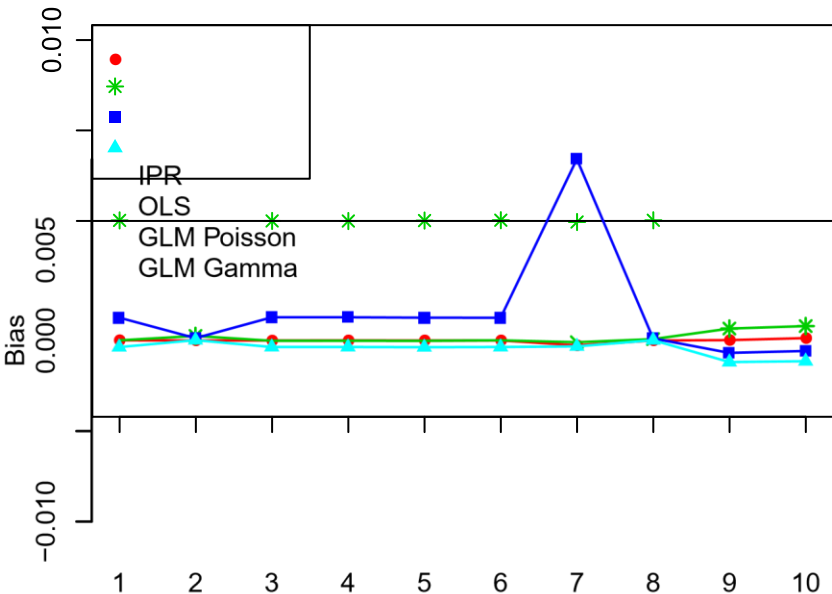

disease 4

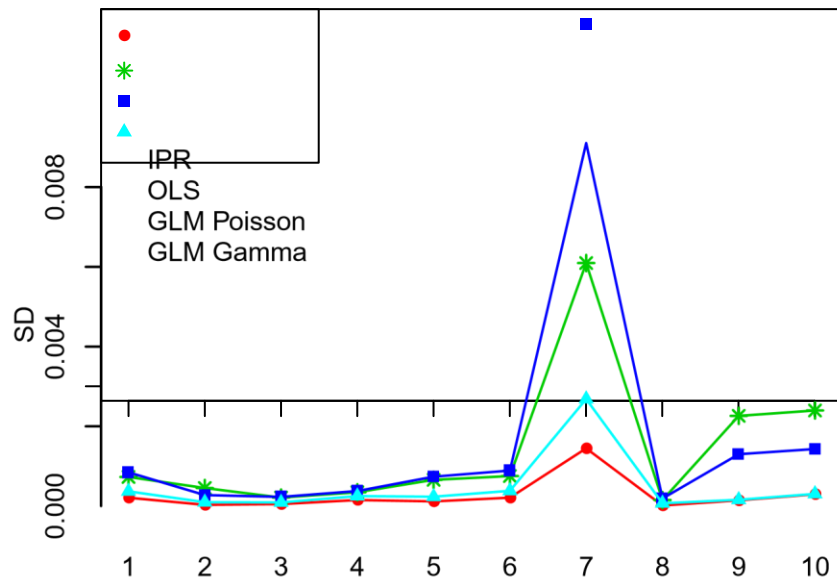

simulation design

disease 4

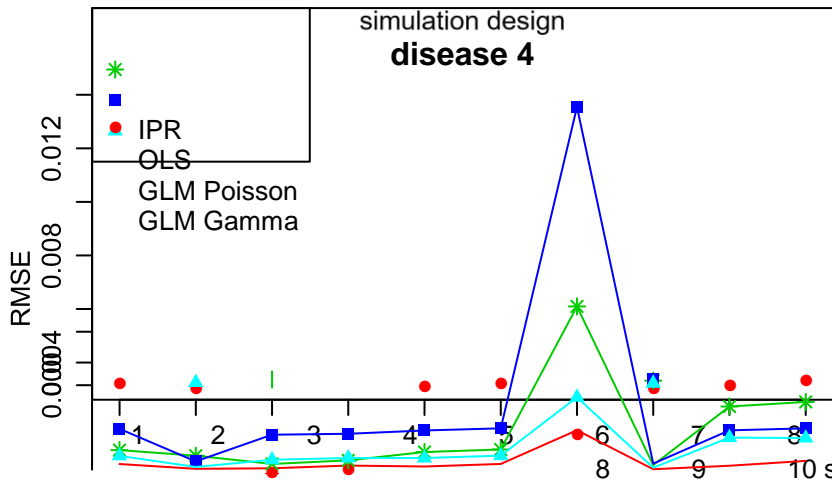

simulation design

disease 4

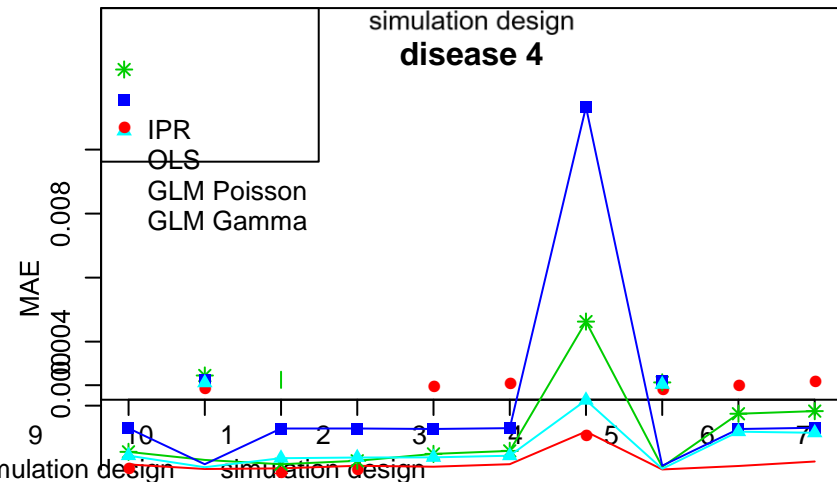



disease 5

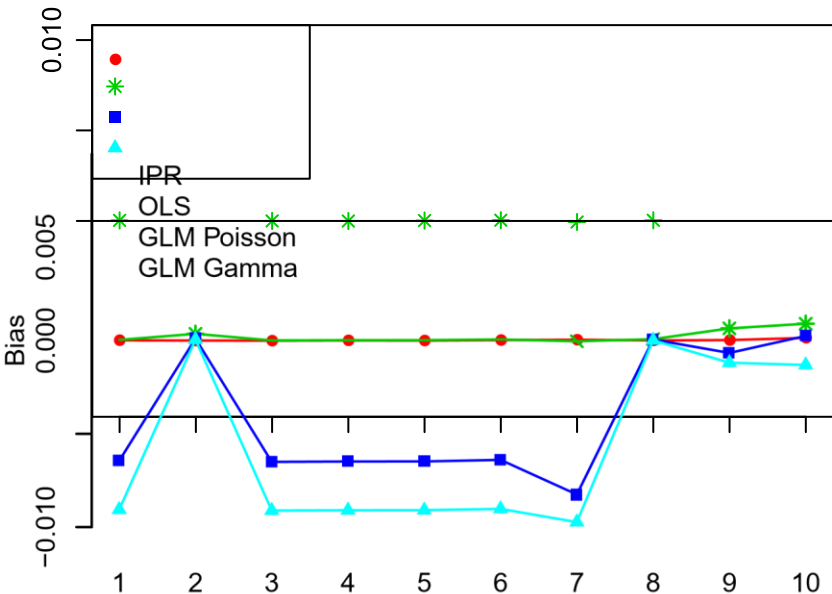

disease 5

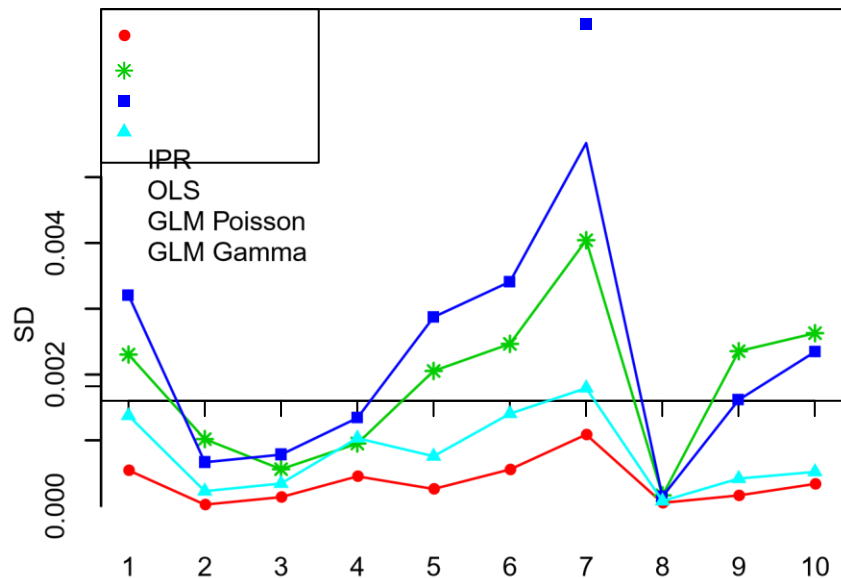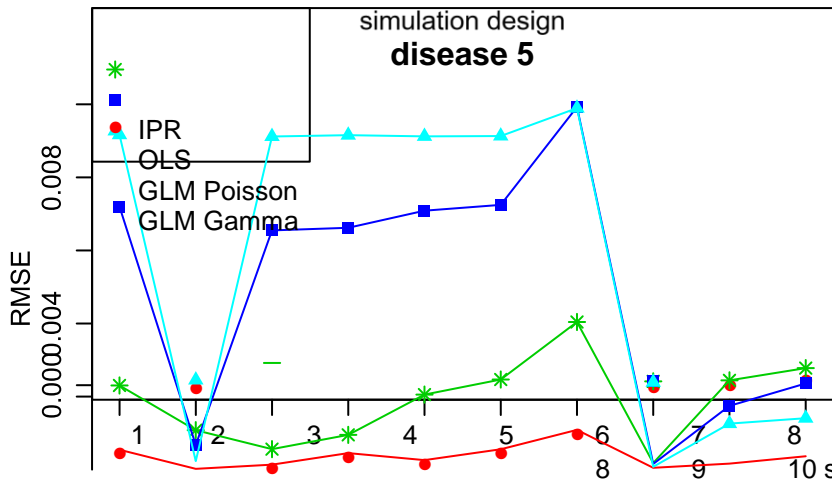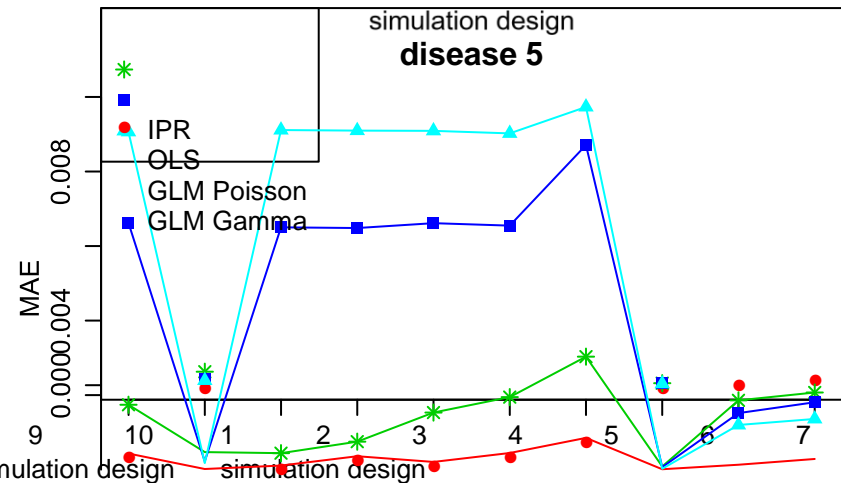

disease 6

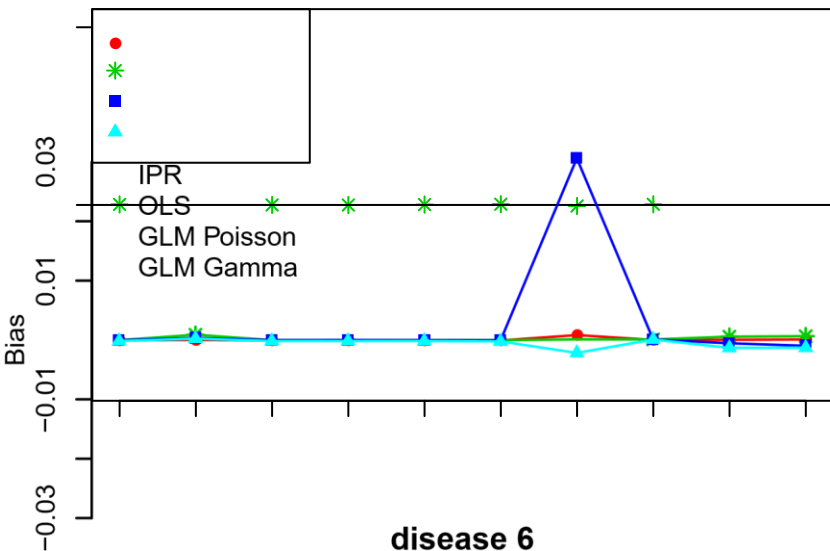

disease 6

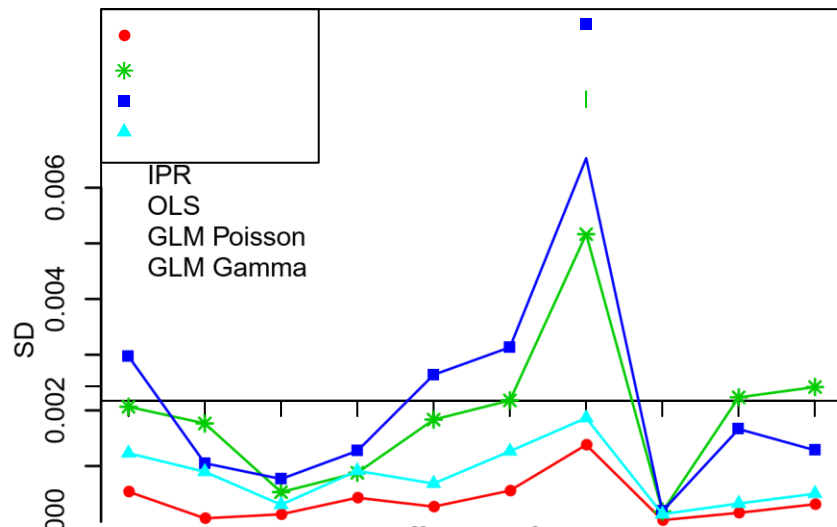

disease 6

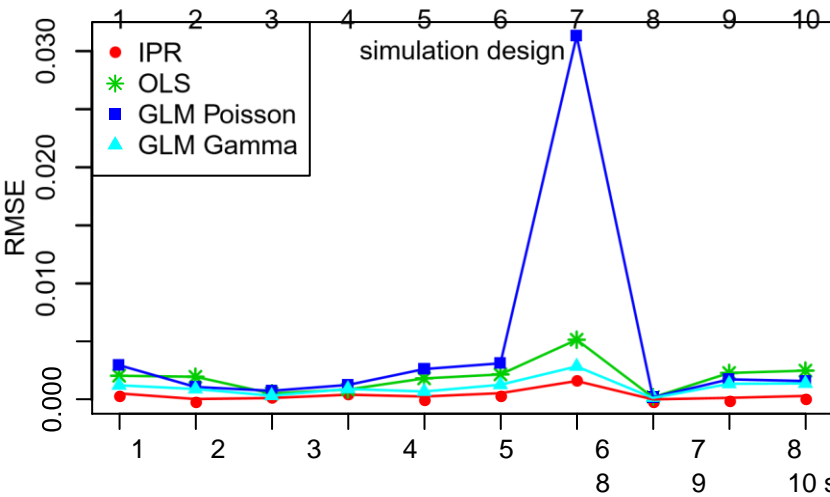

disease 6

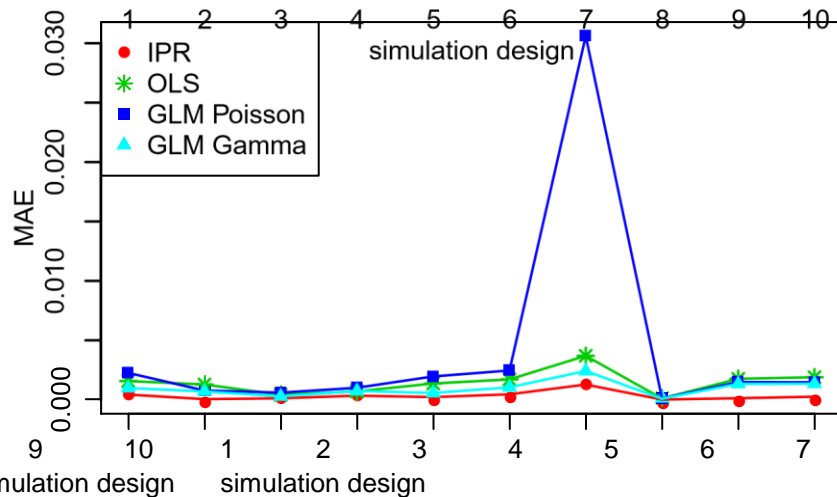

disease 7

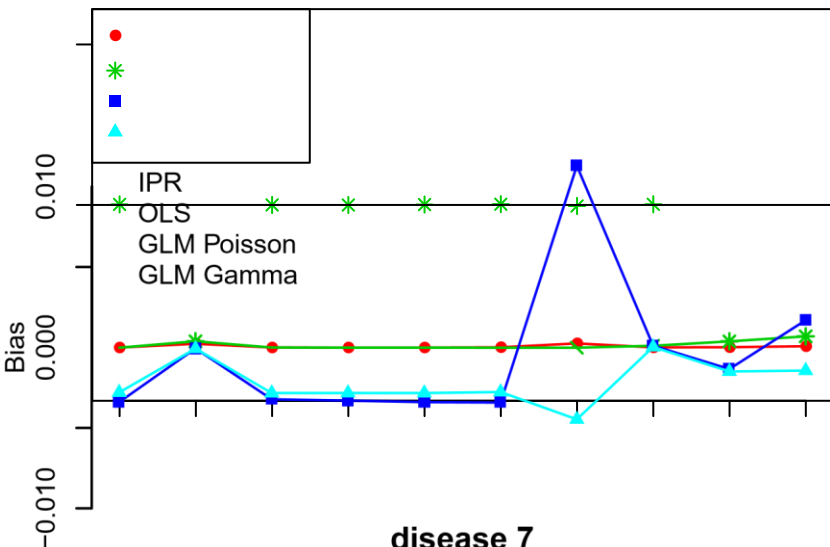

disease 7

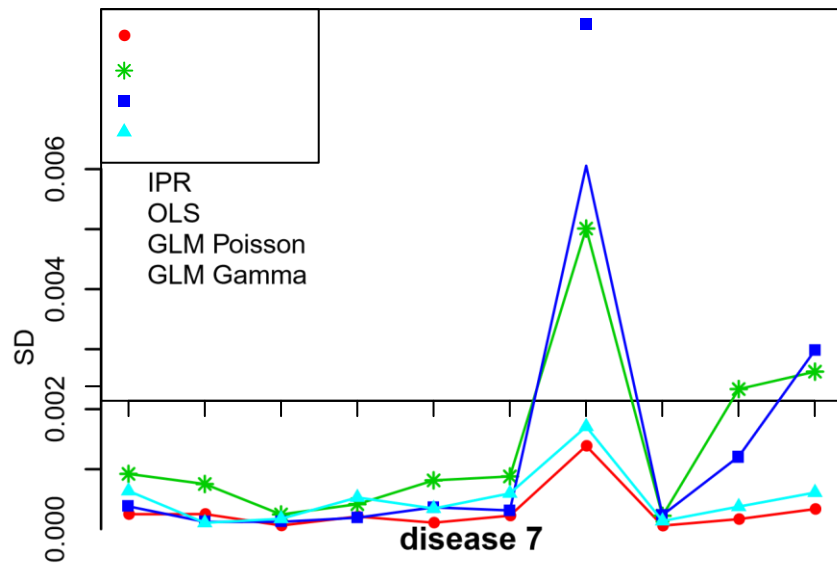

disease 7

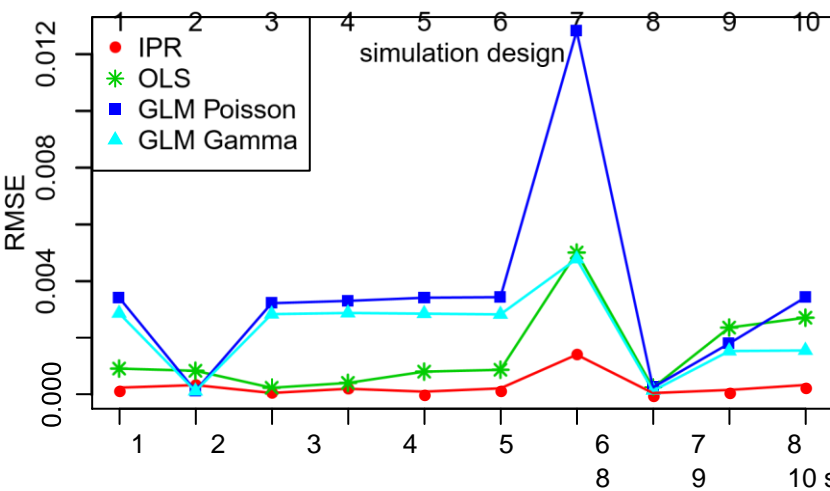

disease 7

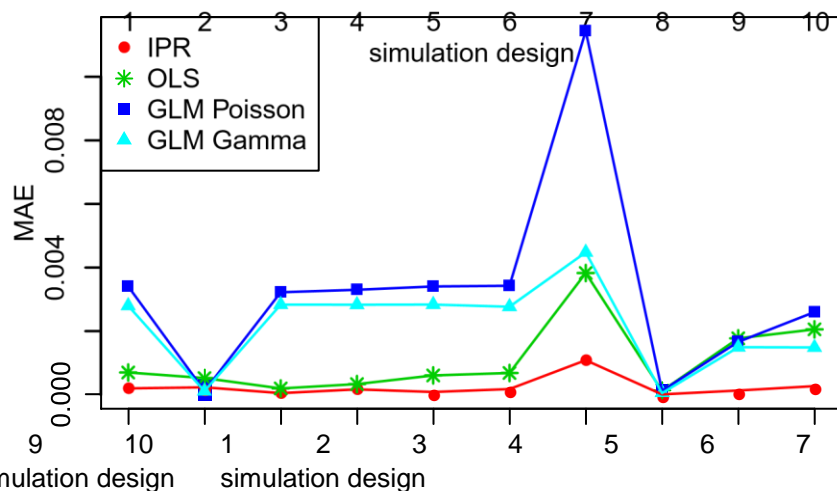

disease 8

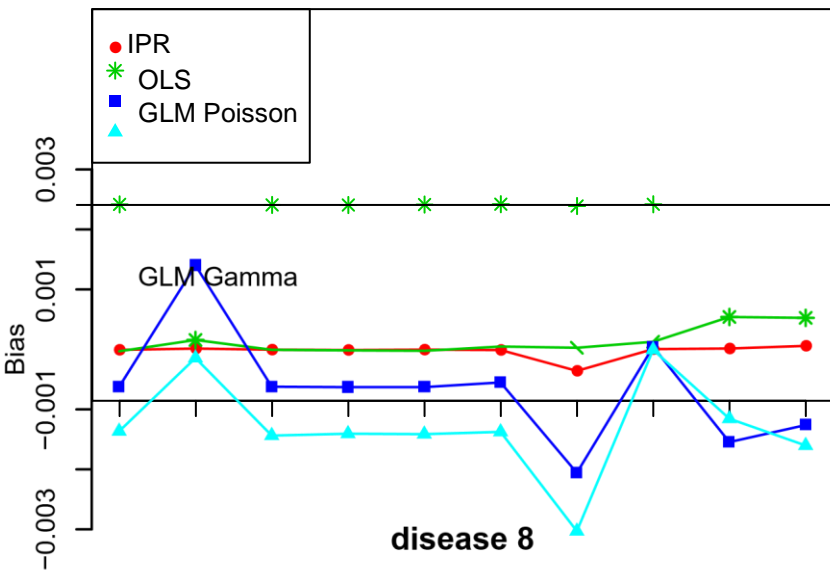

disease 8

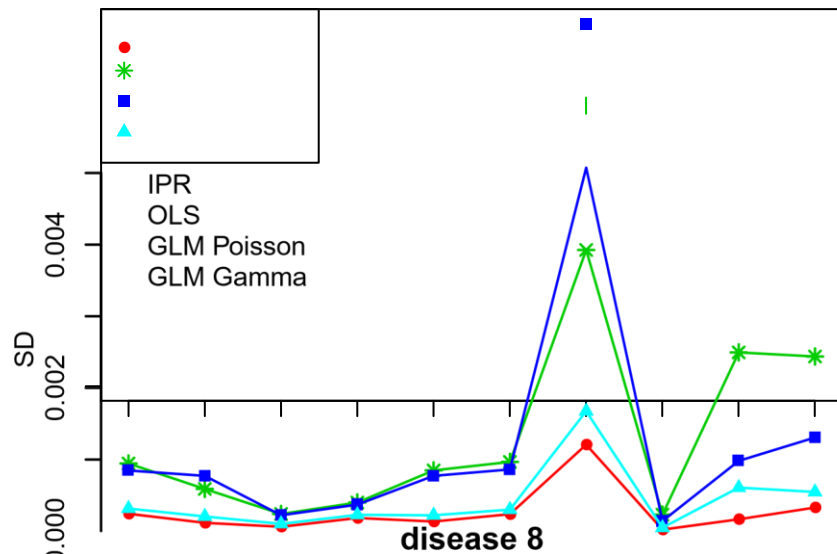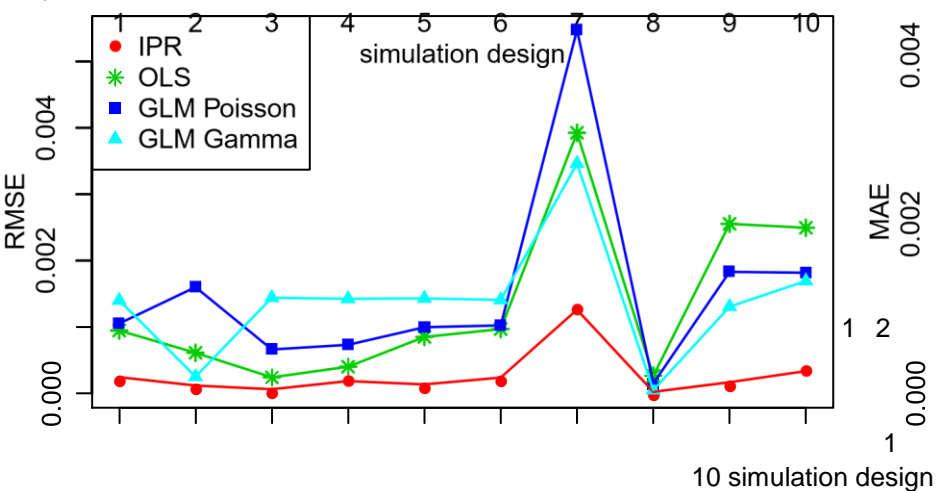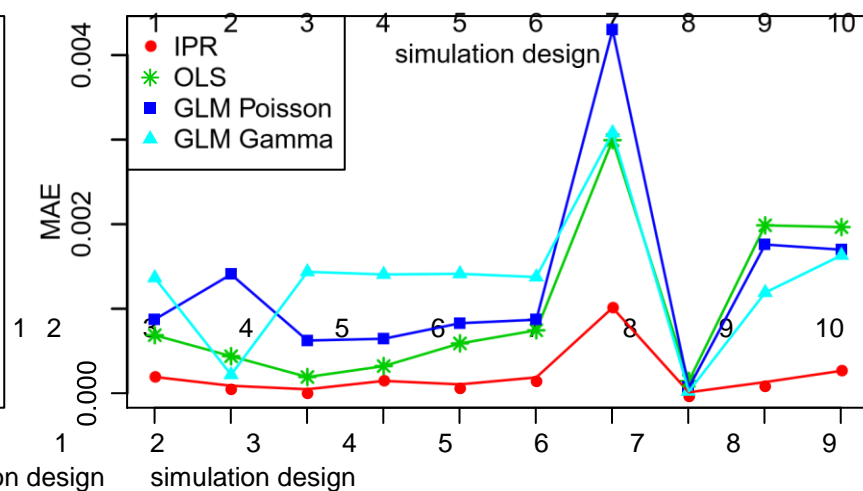

disease 9

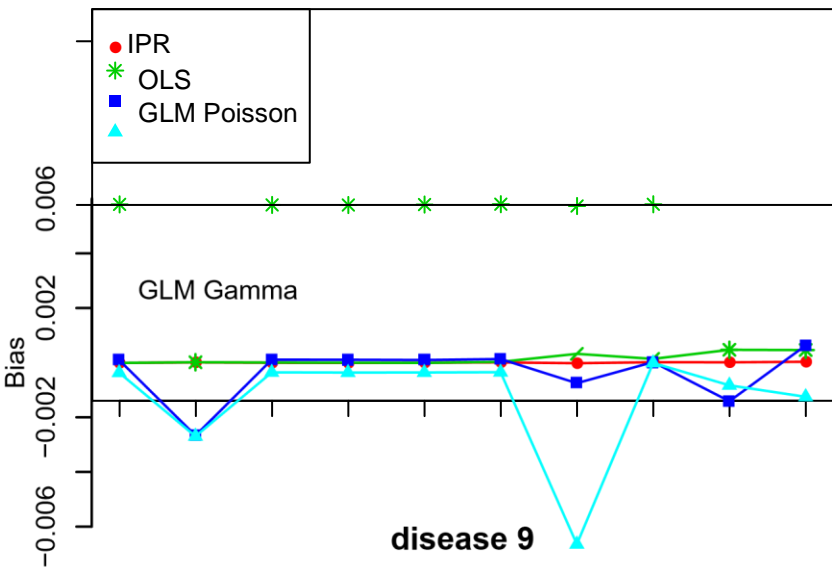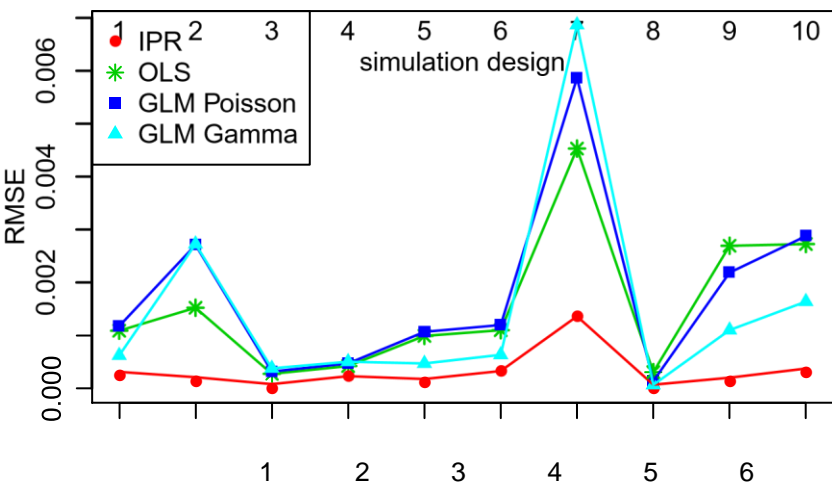

disease 9

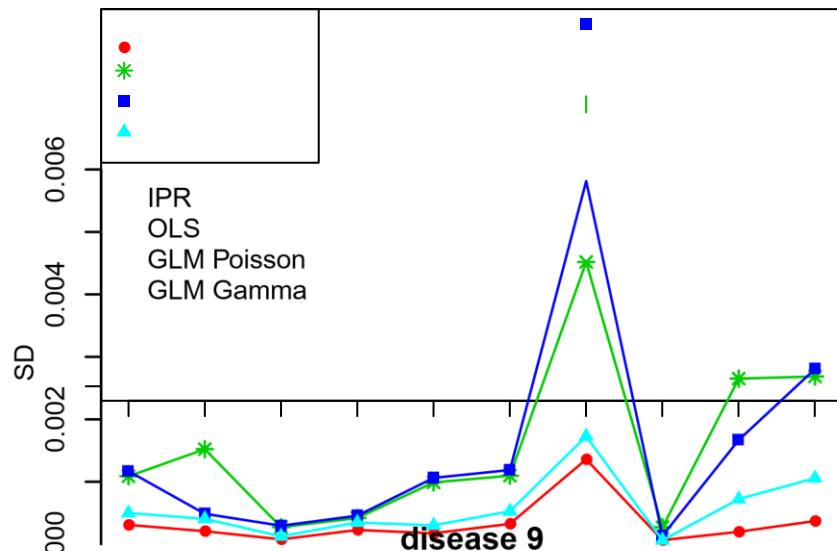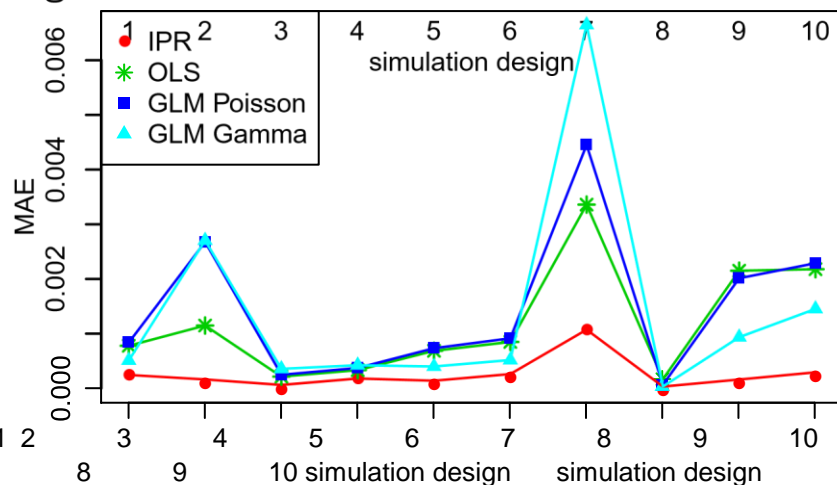

disease 10

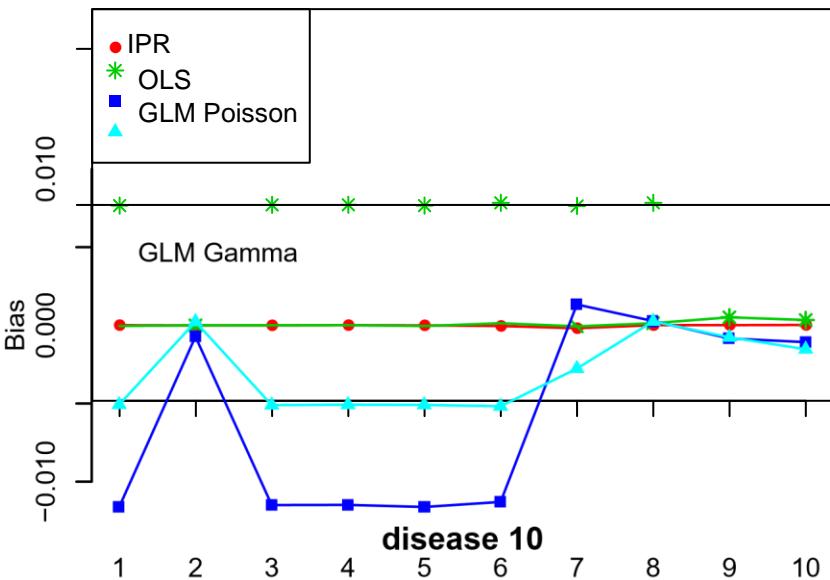

disease 10

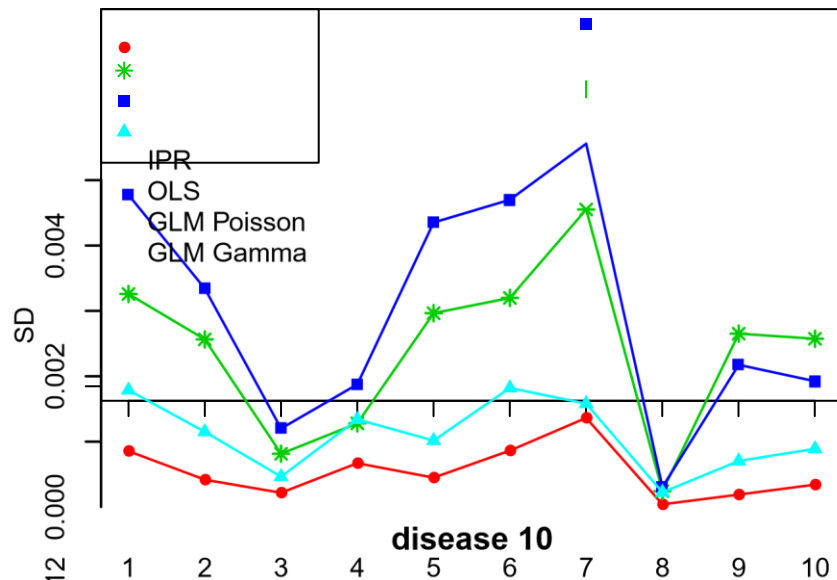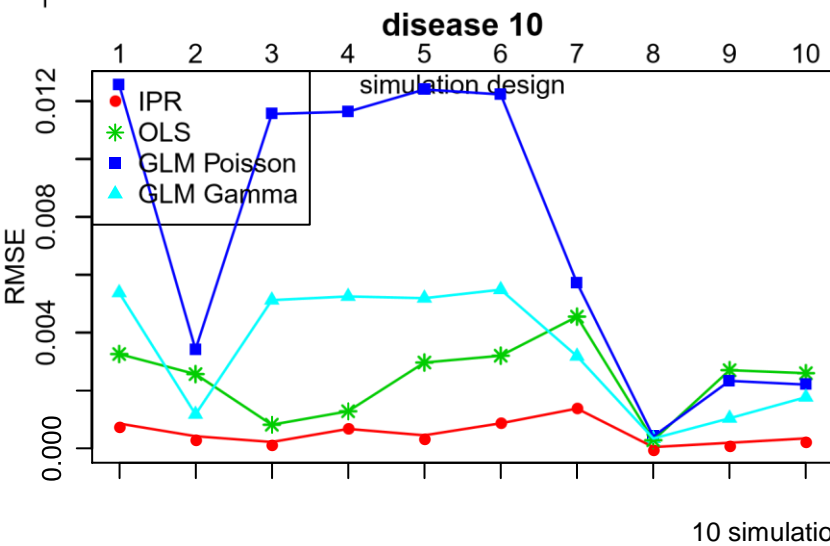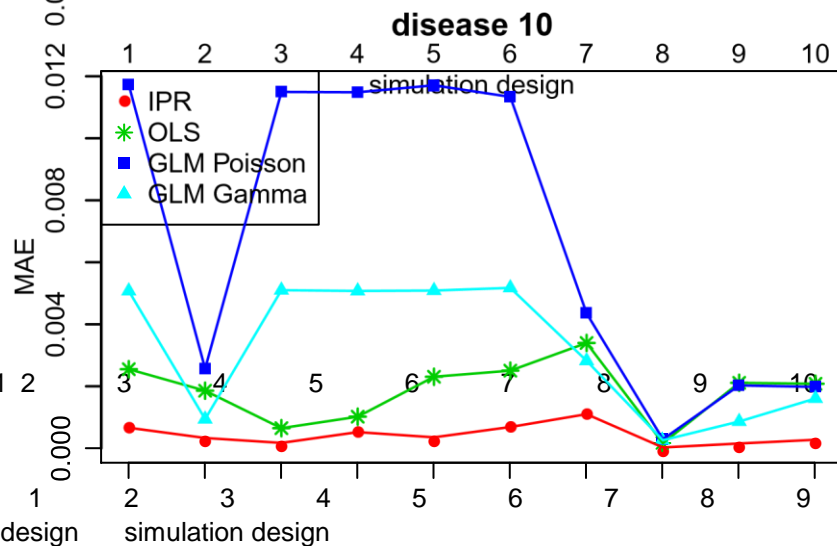

disease 11

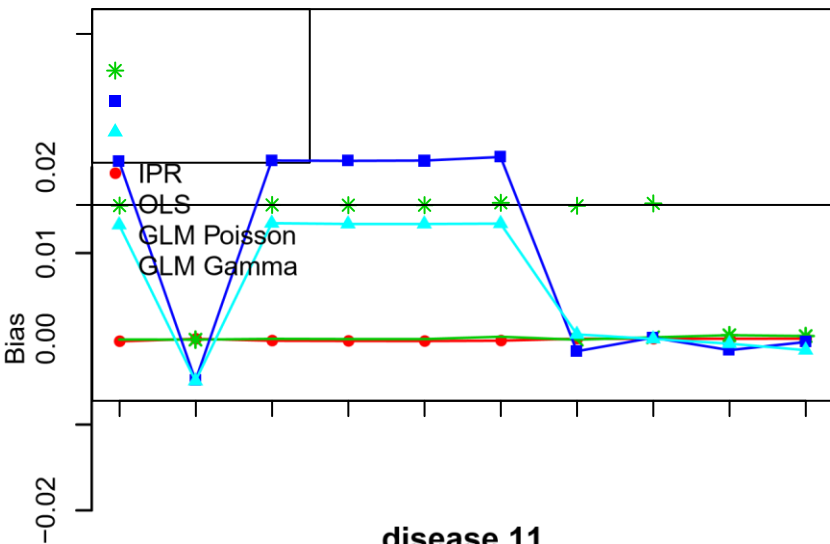

disease 11

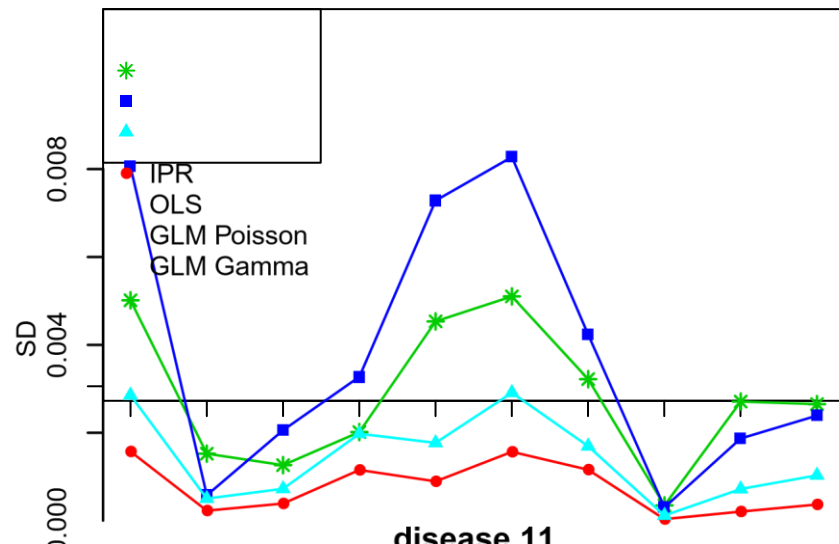

disease 11

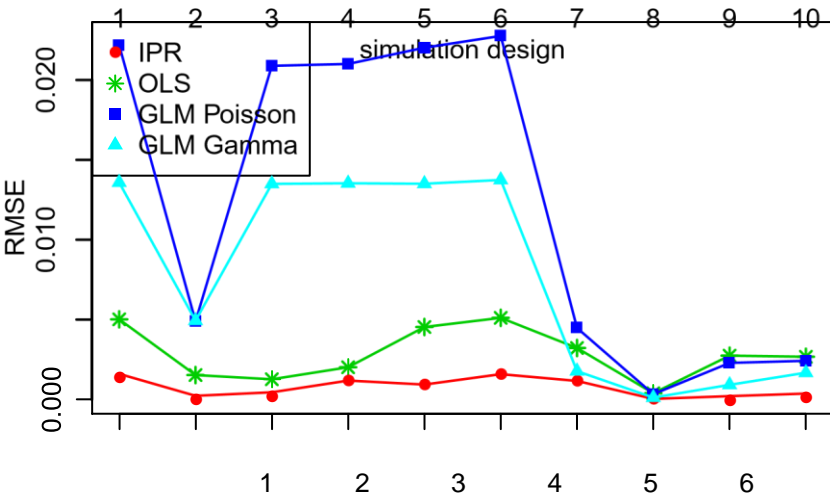

disease 11

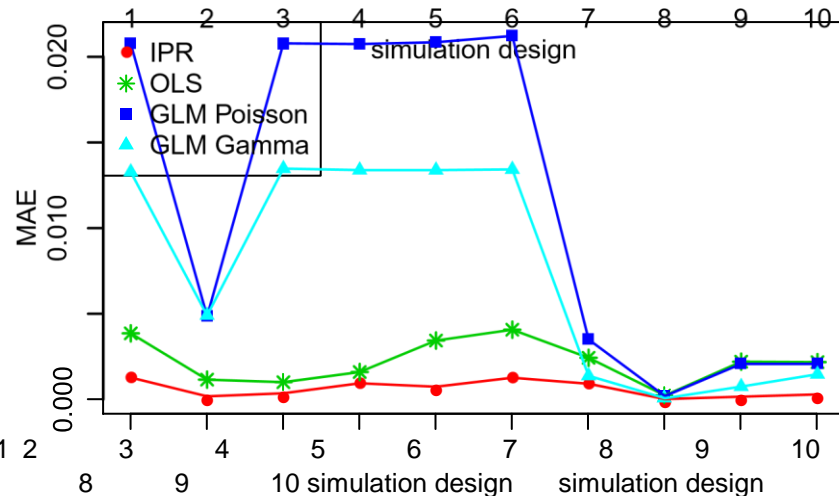

disease 12

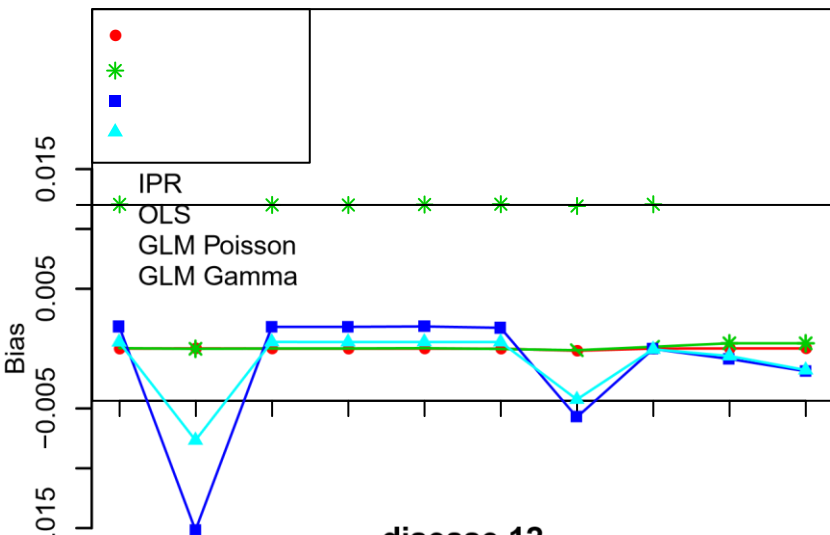

disease 12

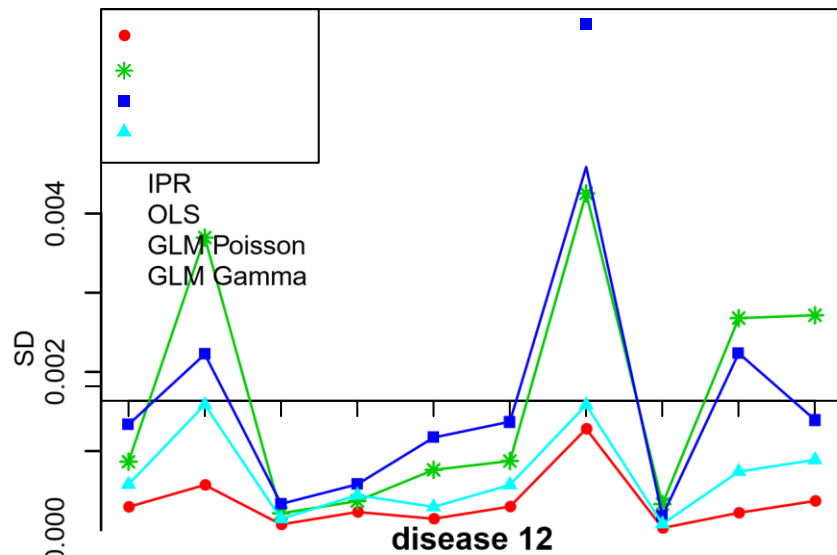

disease 12

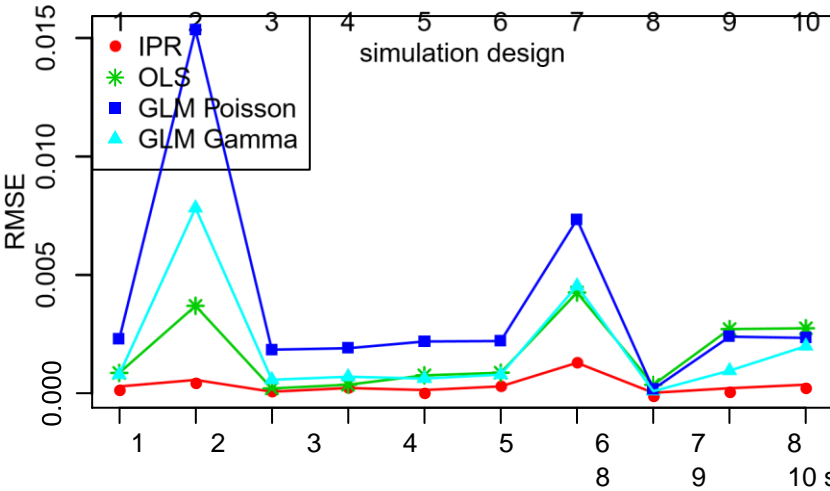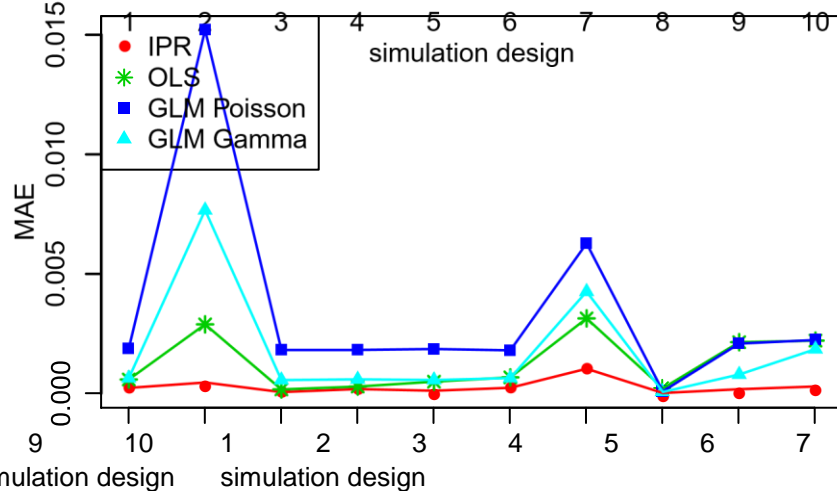



disease 13

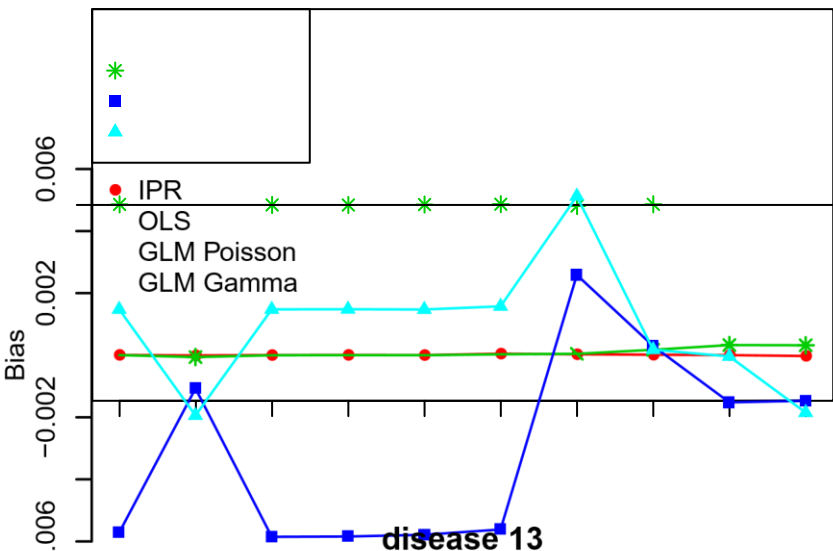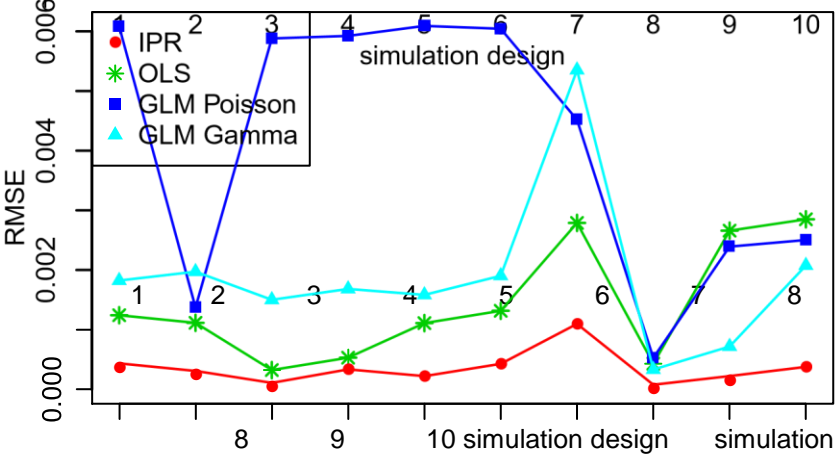

disease 13

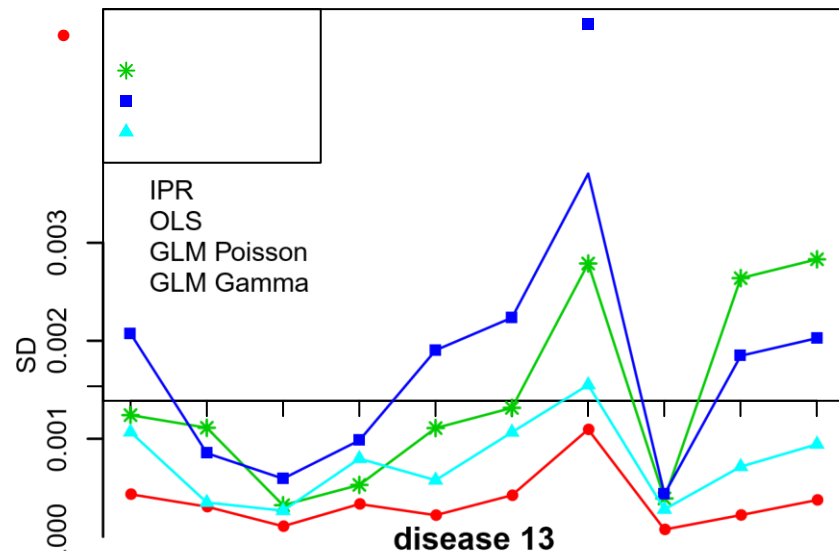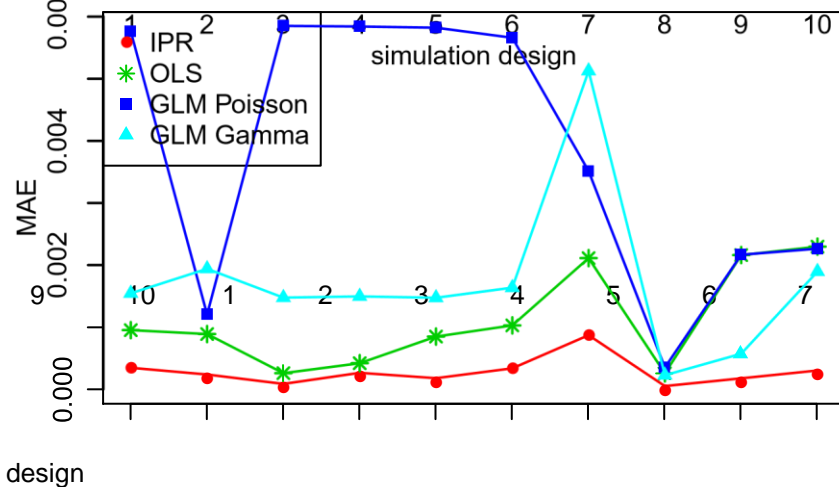

disease 14

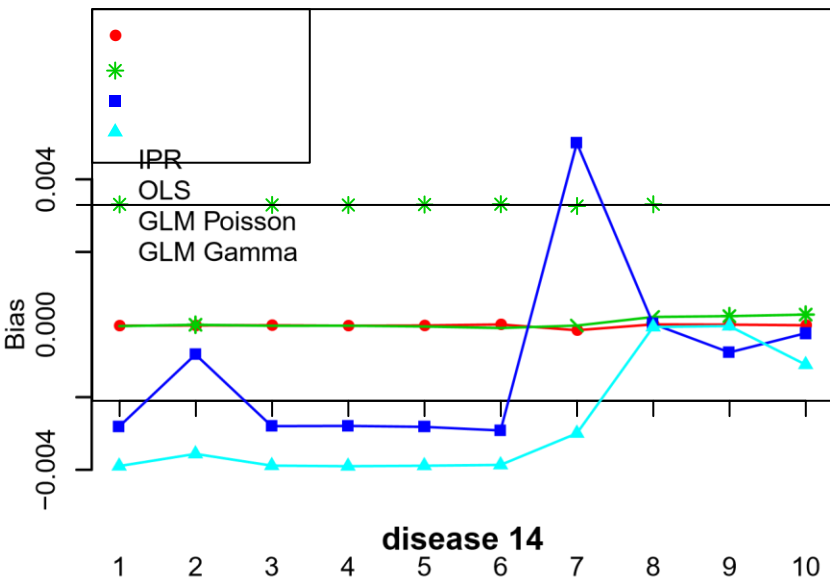

disease 14

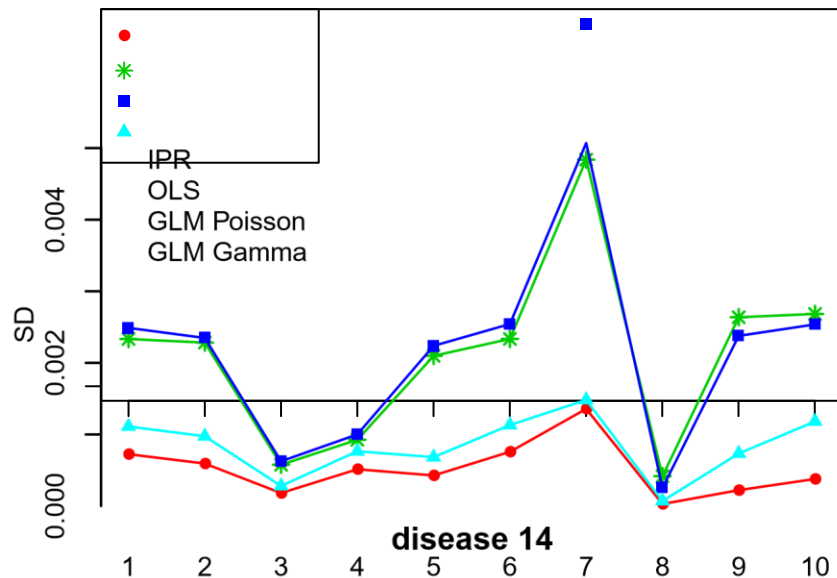

disease 14

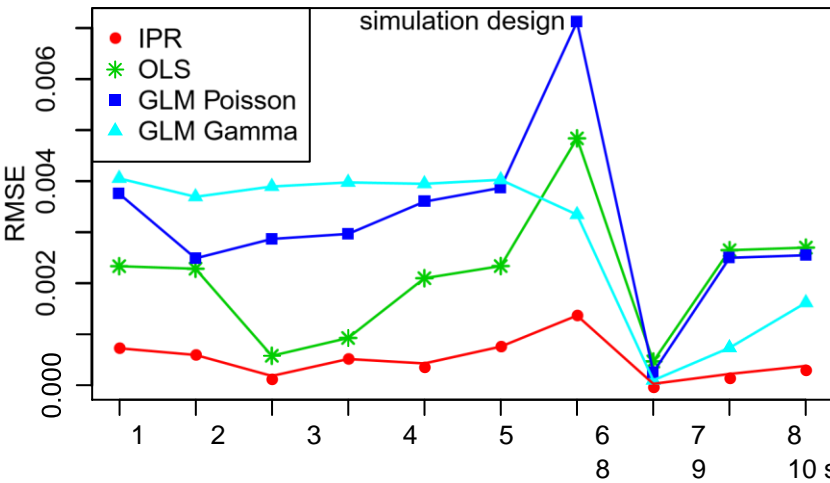

disease 14

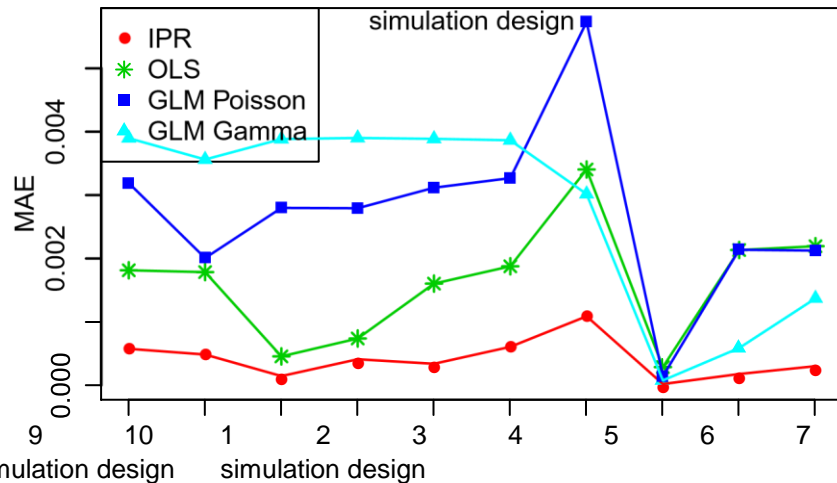

disease 15

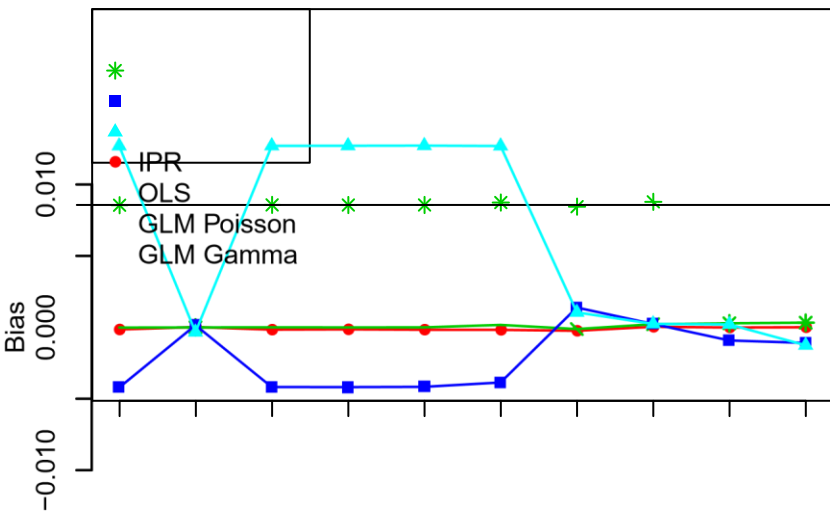

disease 15

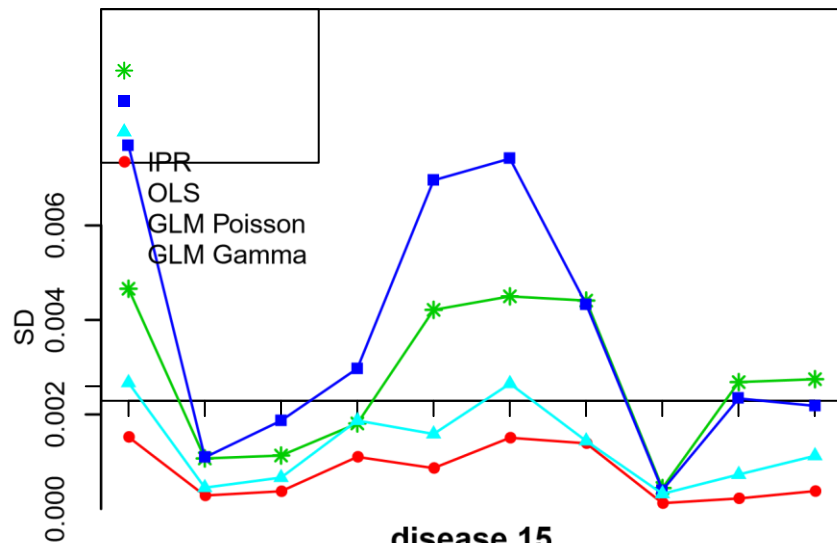

disease 15

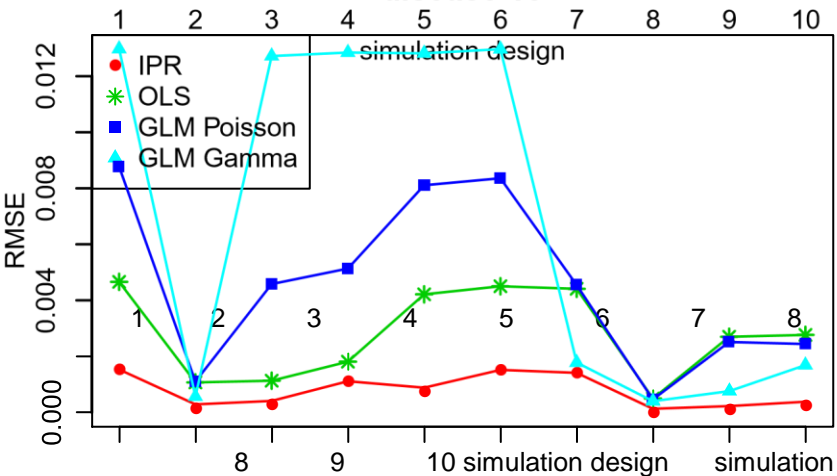

disease 15

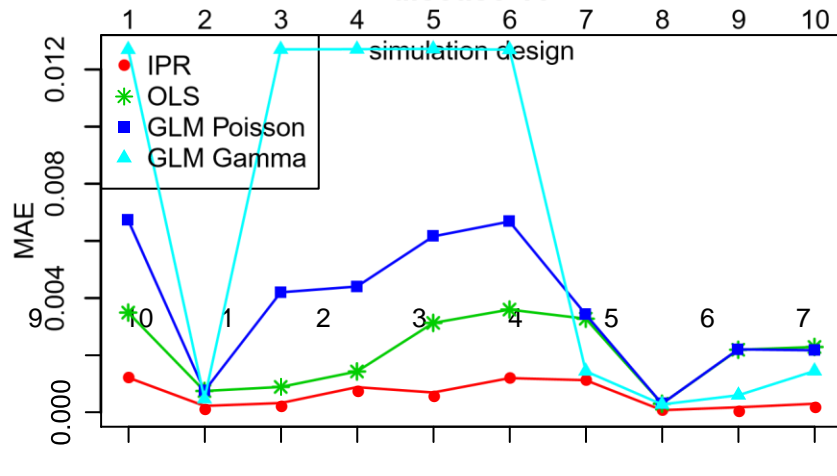

design

disease 16

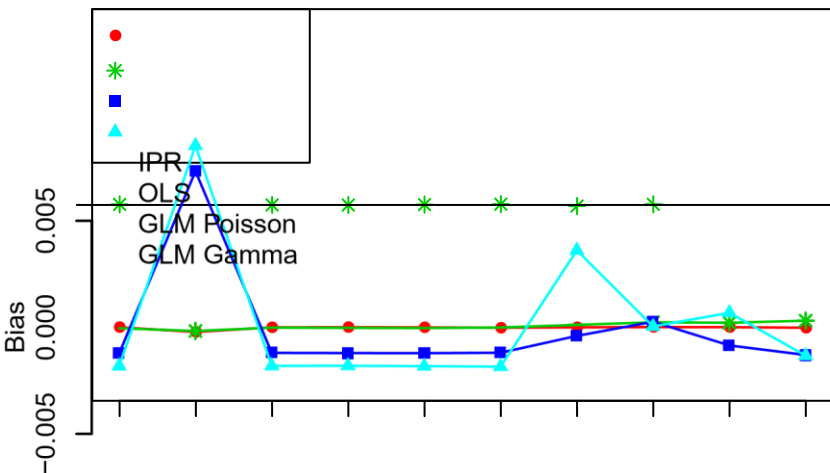

disease 16

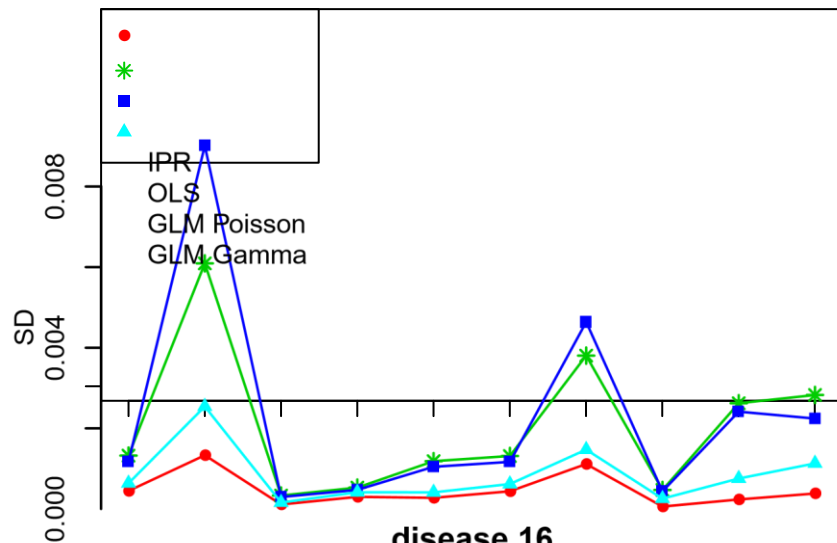

disease 16

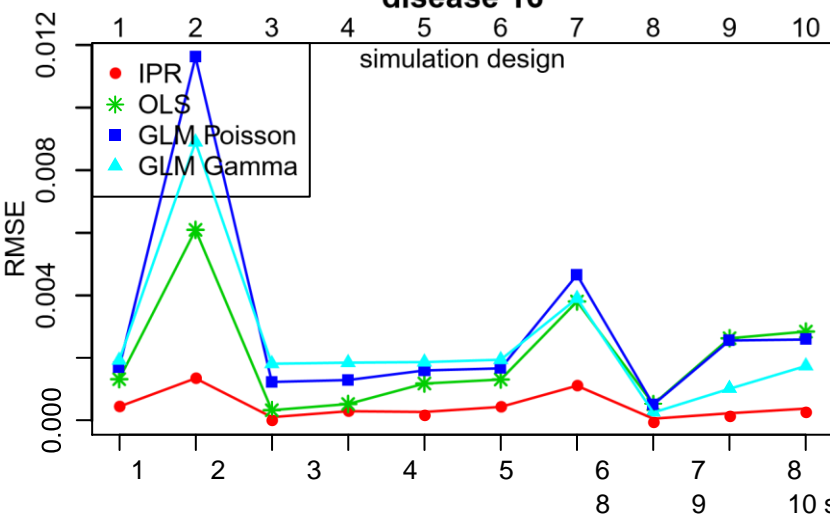

disease 16

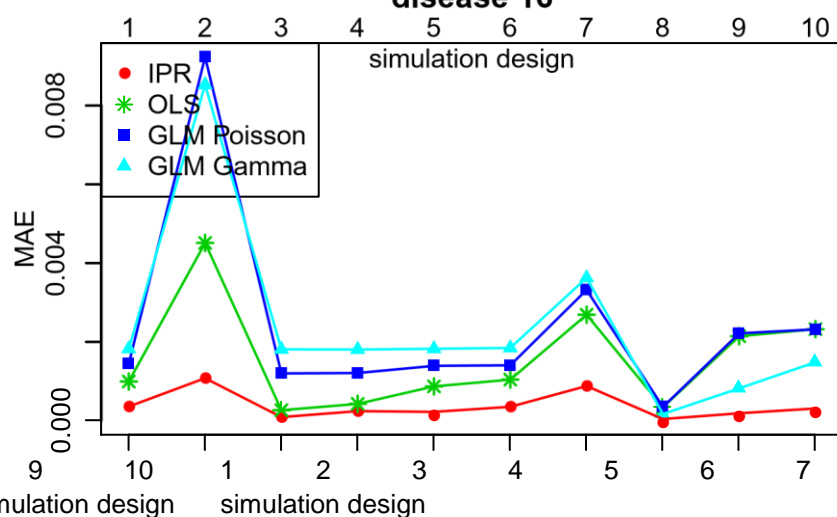

disease 17

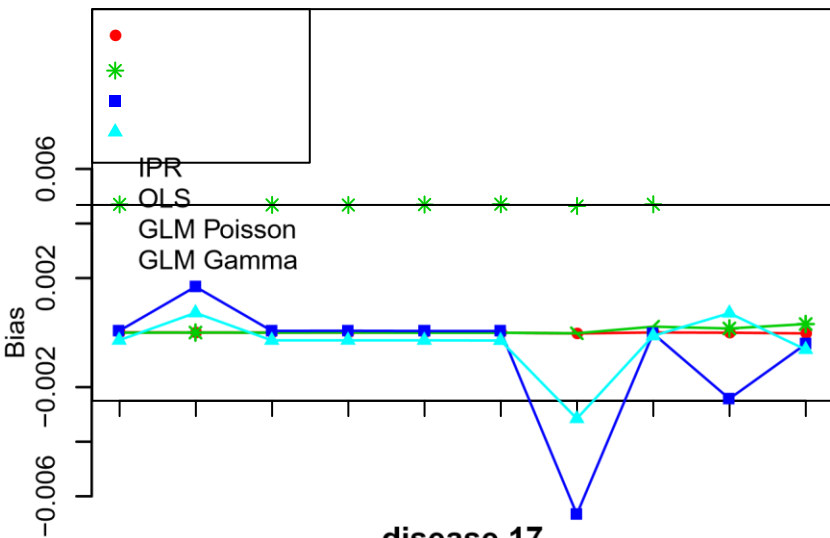

disease 17

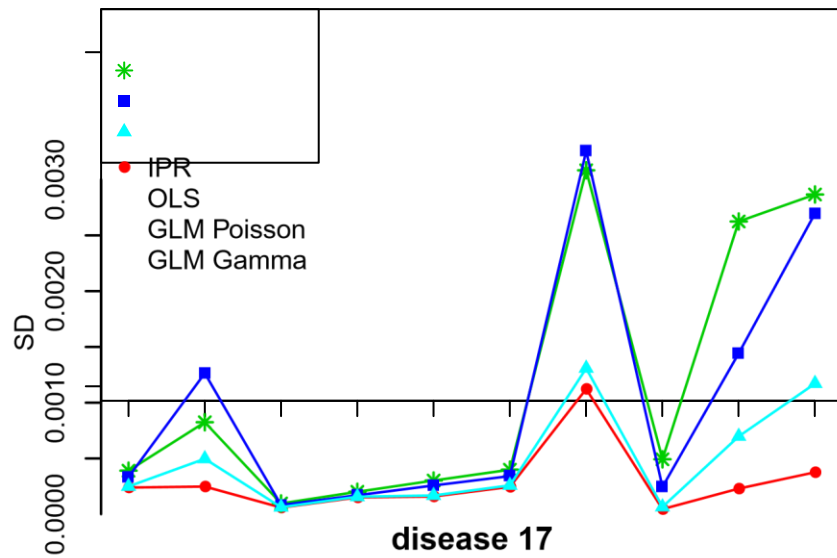

disease 17

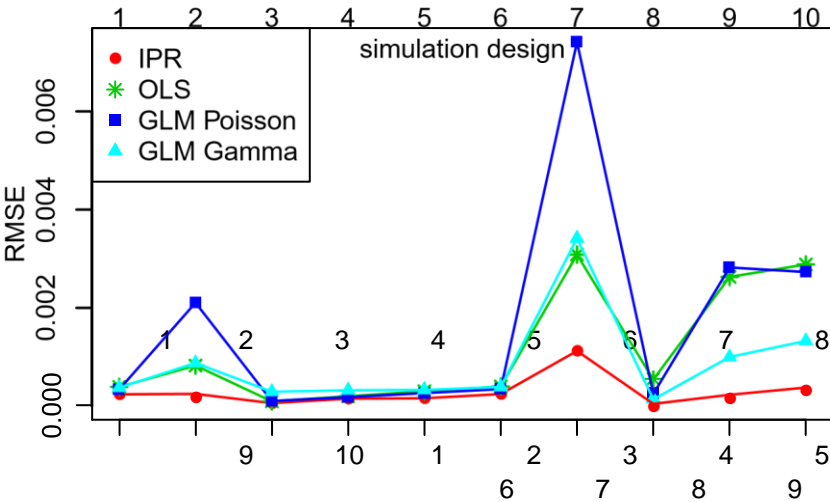

disease 17

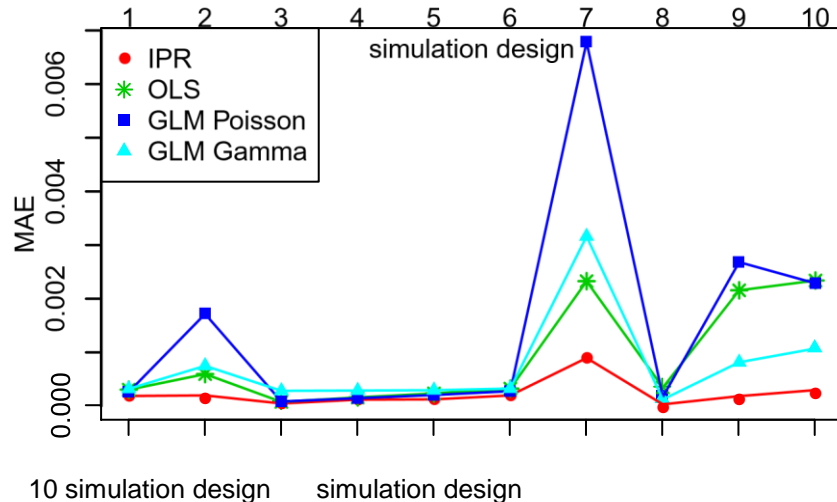

disease 18

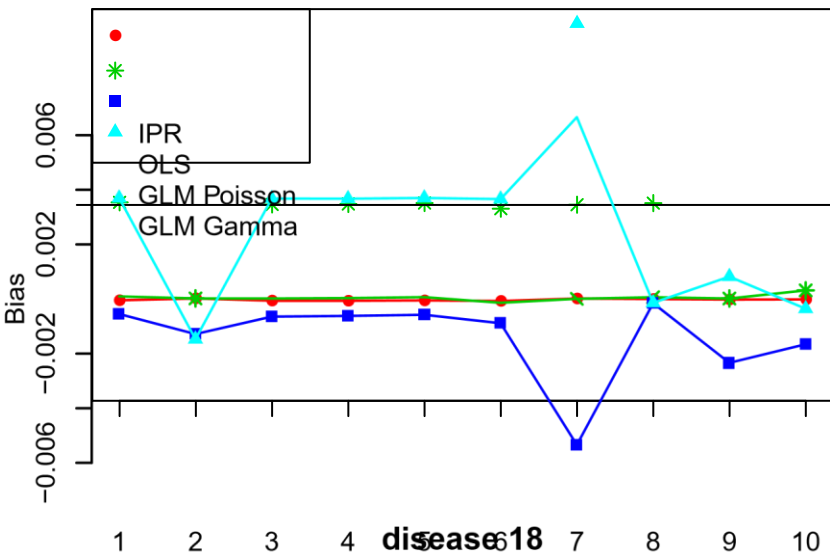

disease 18

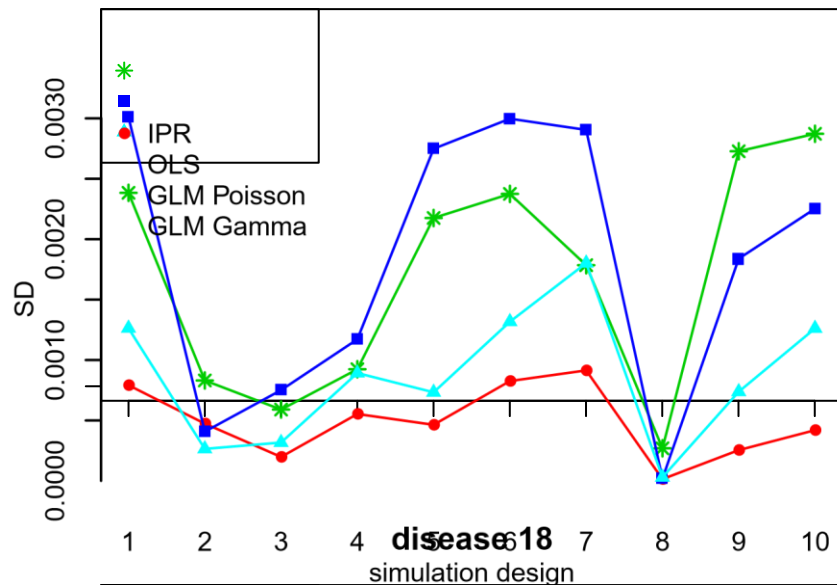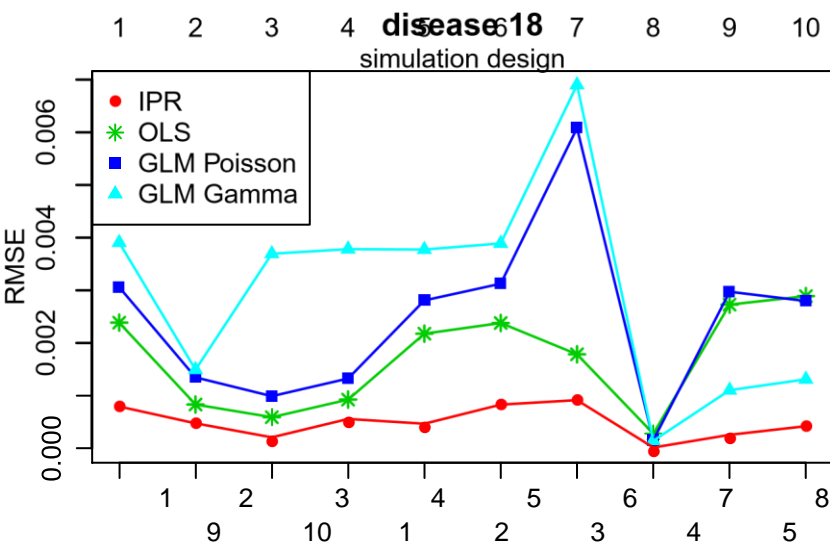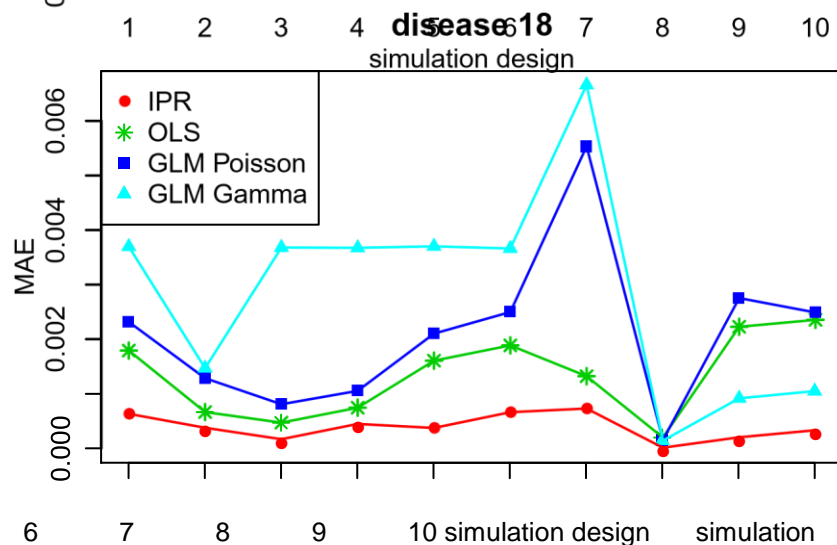

disease 19

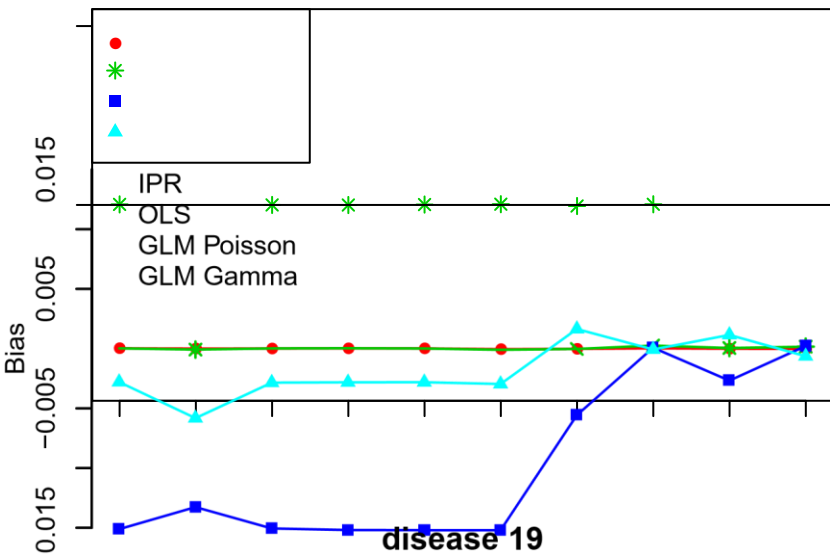

disease 19

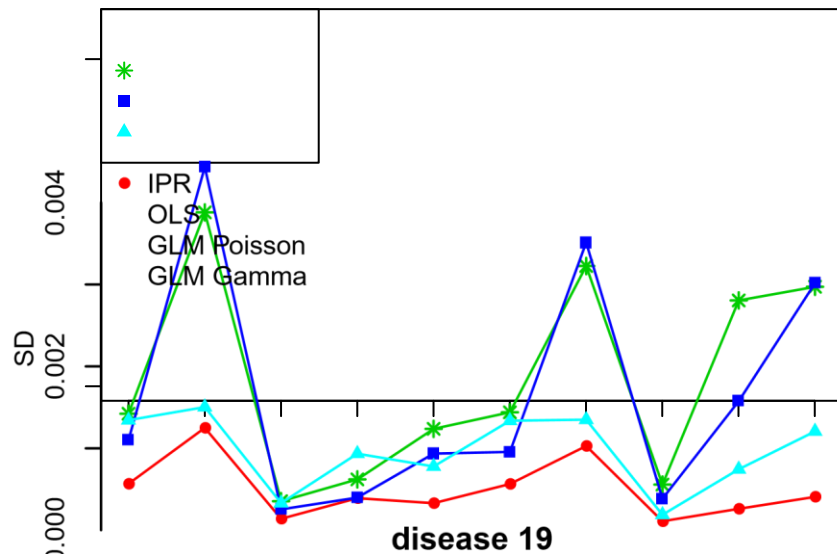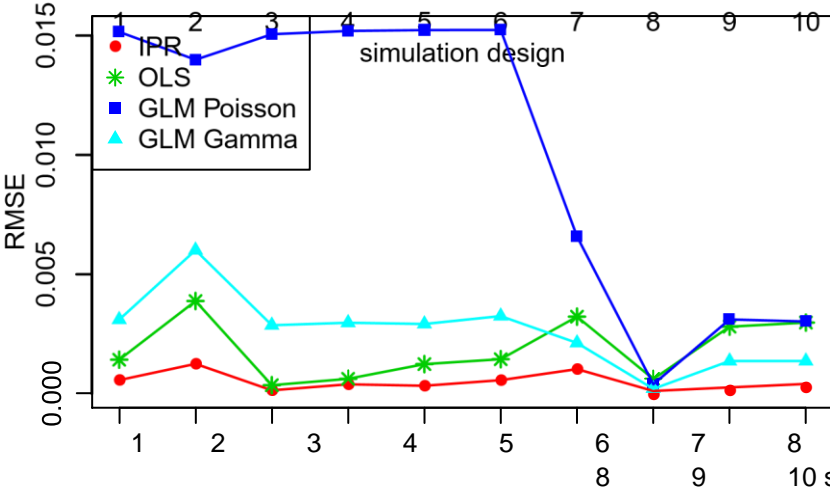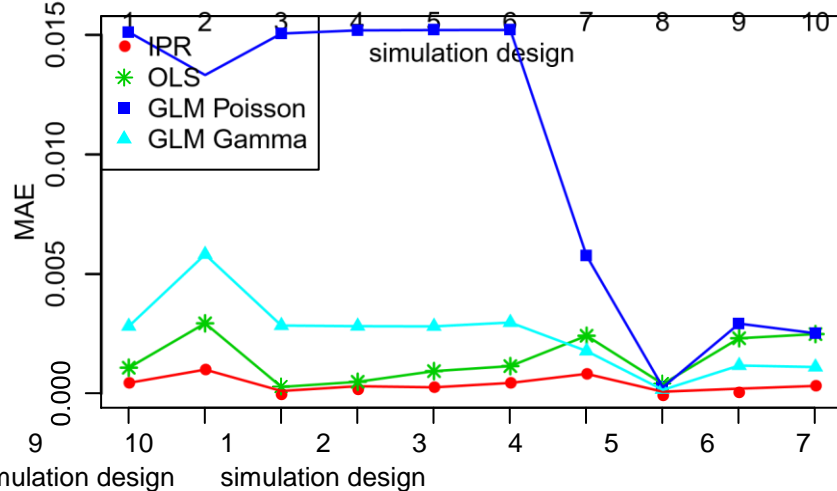

disease 20

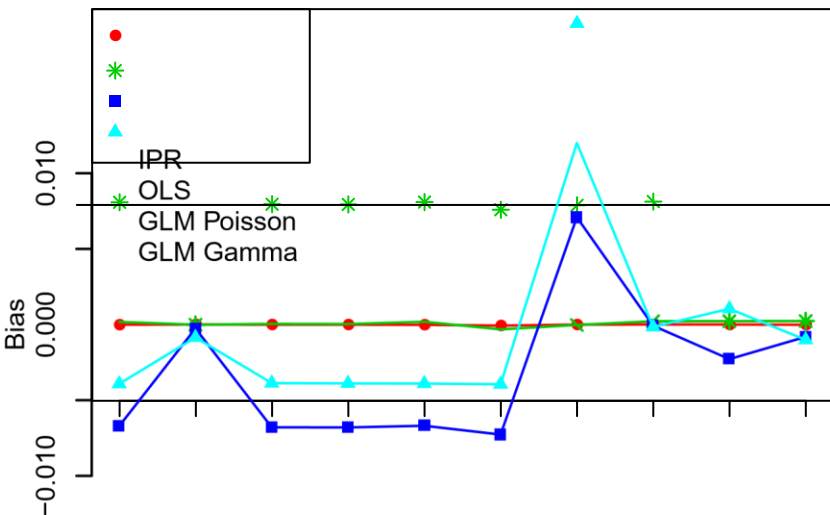

disease 20

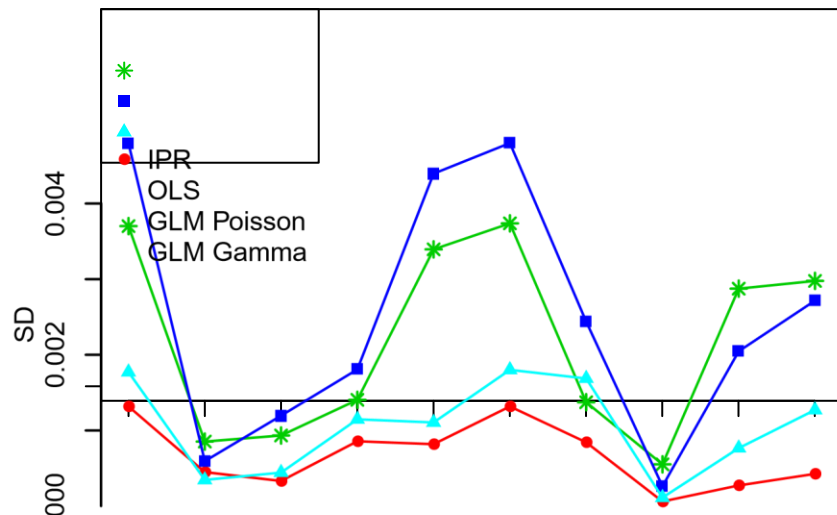

disease 20

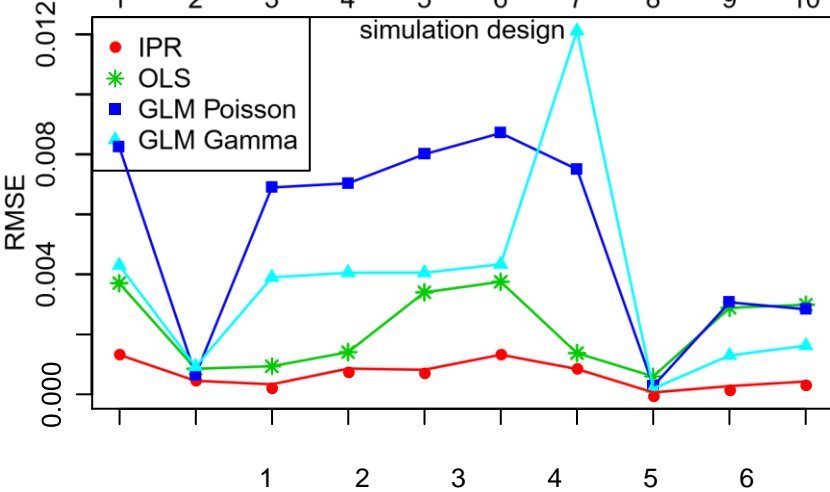

disease 20

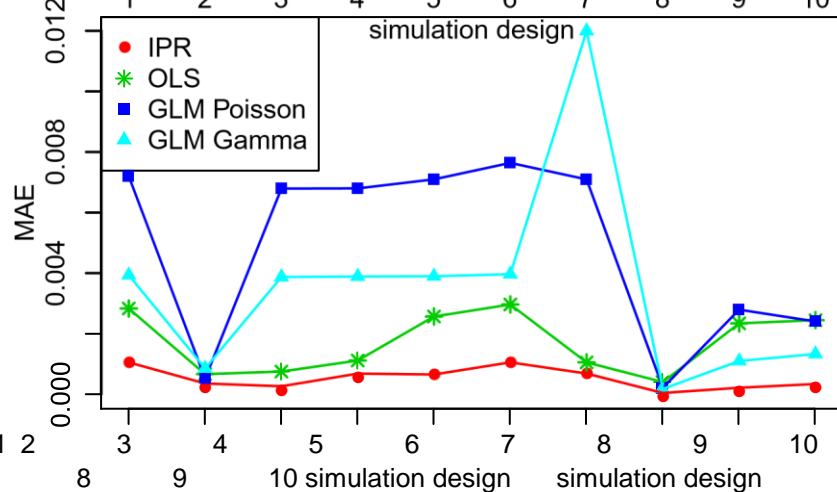



disease 21

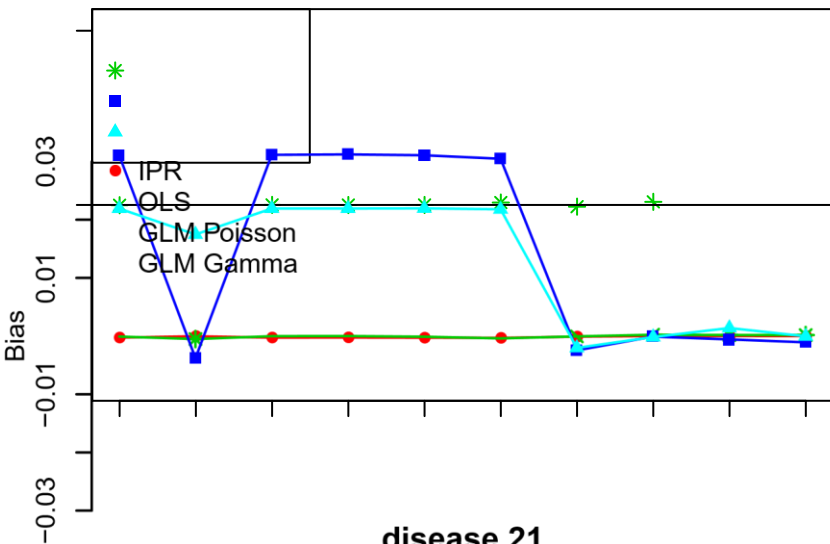

disease 21

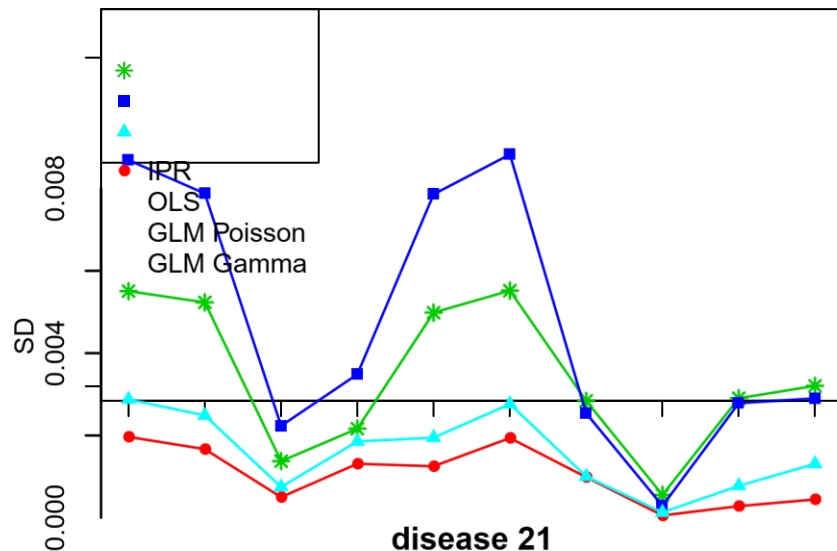

disease 21

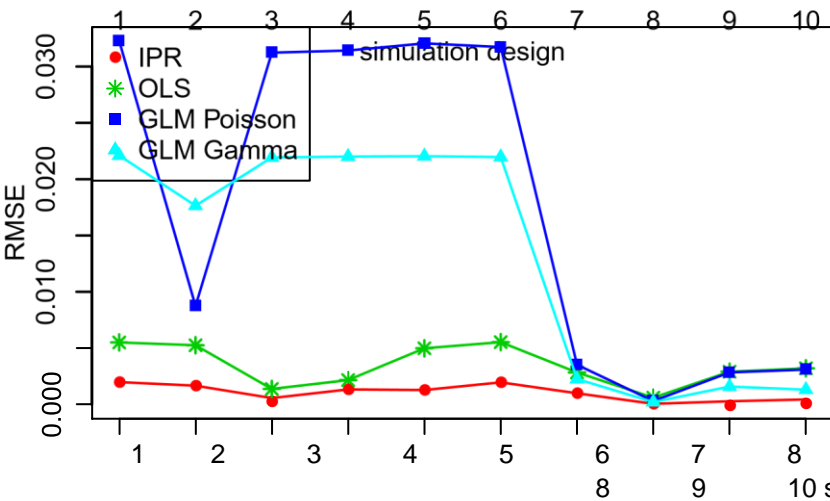

disease 21

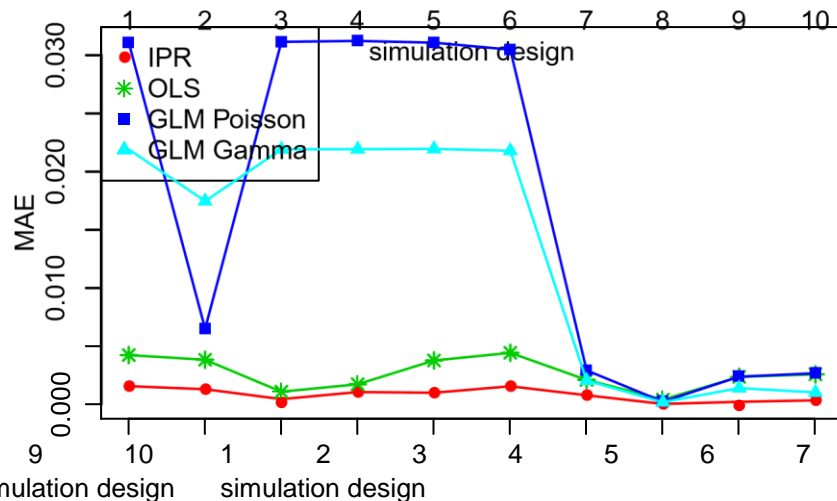

disease 22

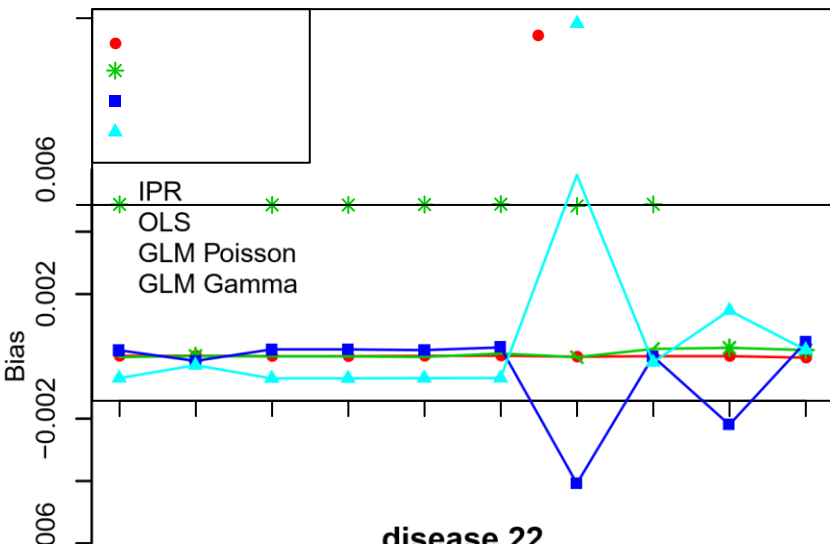

disease 22

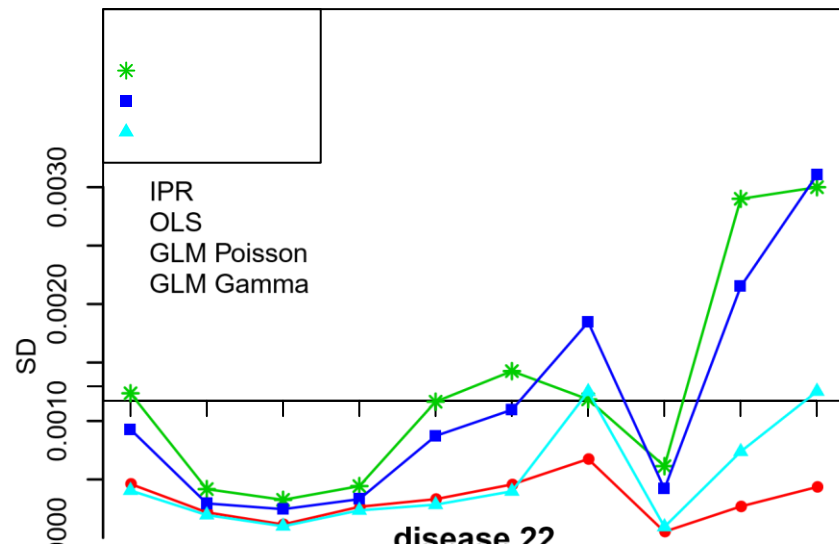

disease 22

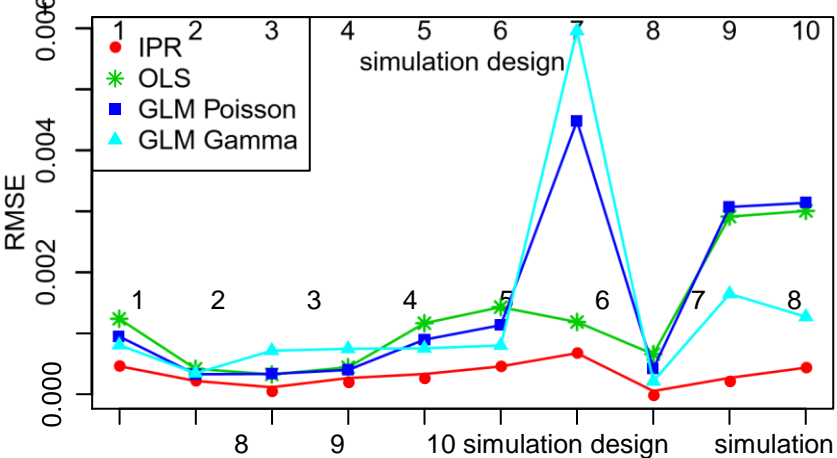

disease 22

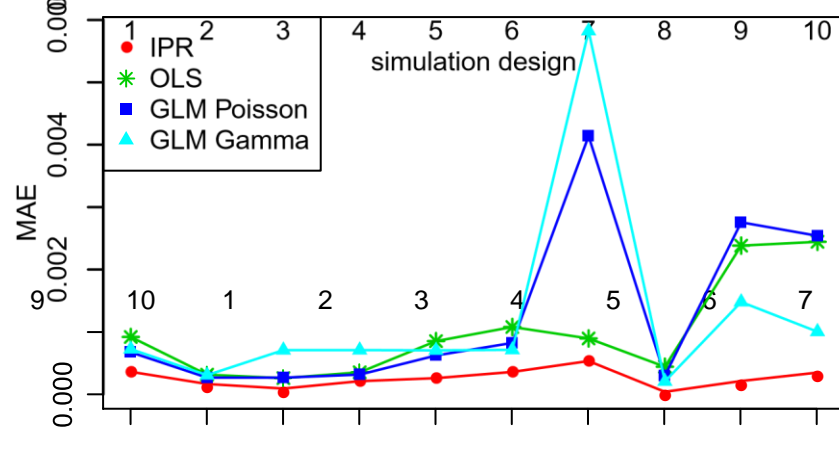

design

disease 23

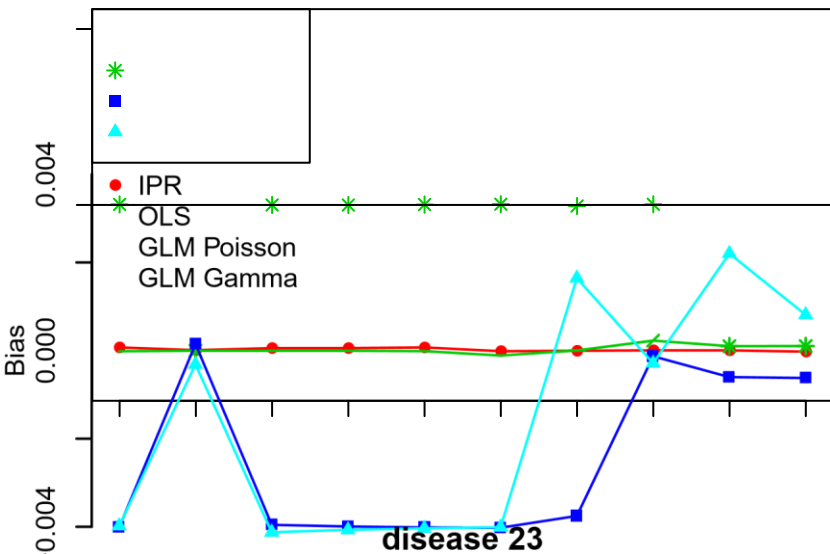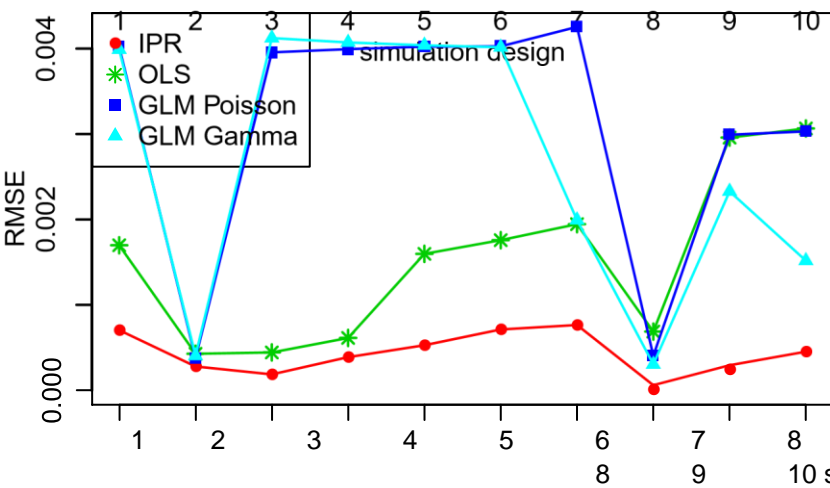

disease 23

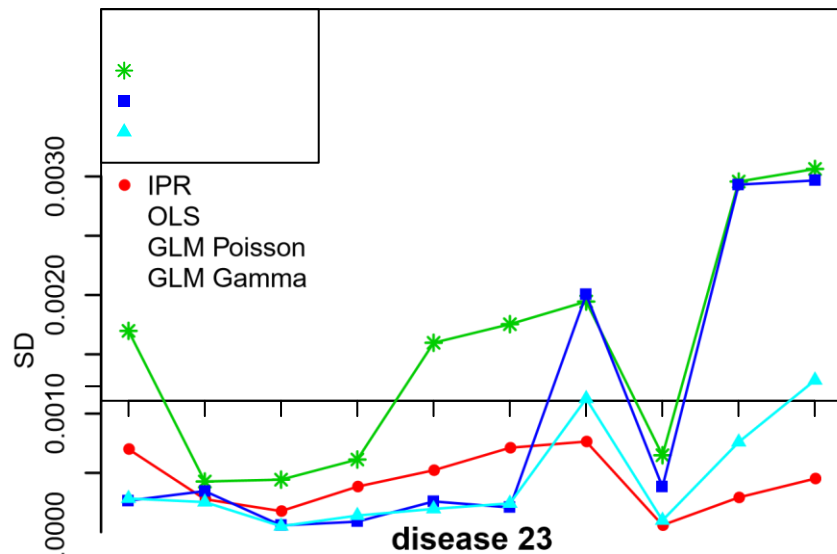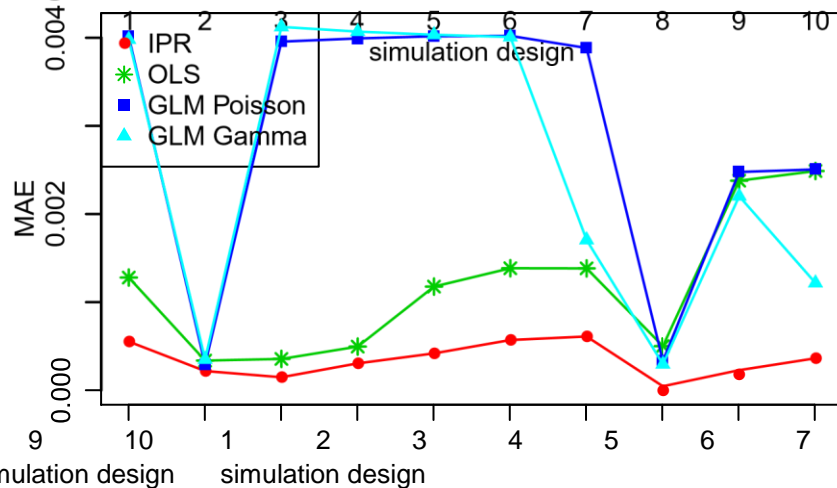

disease 24

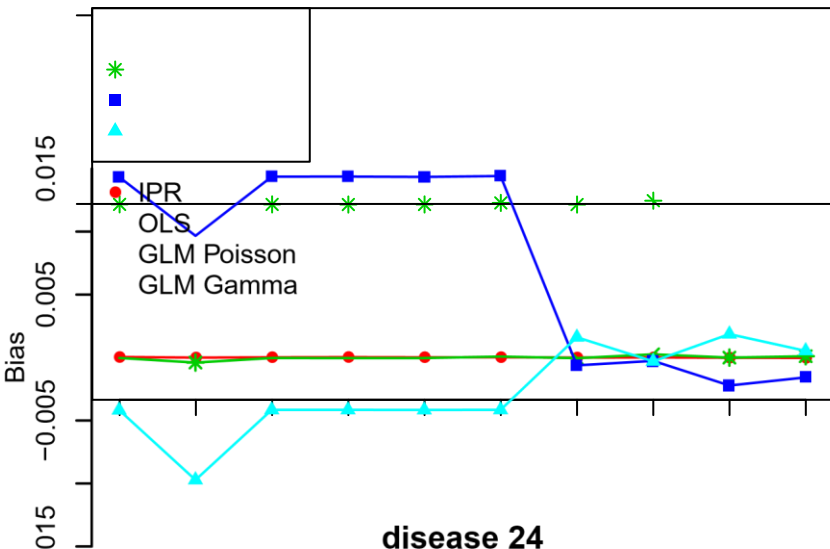

disease 24

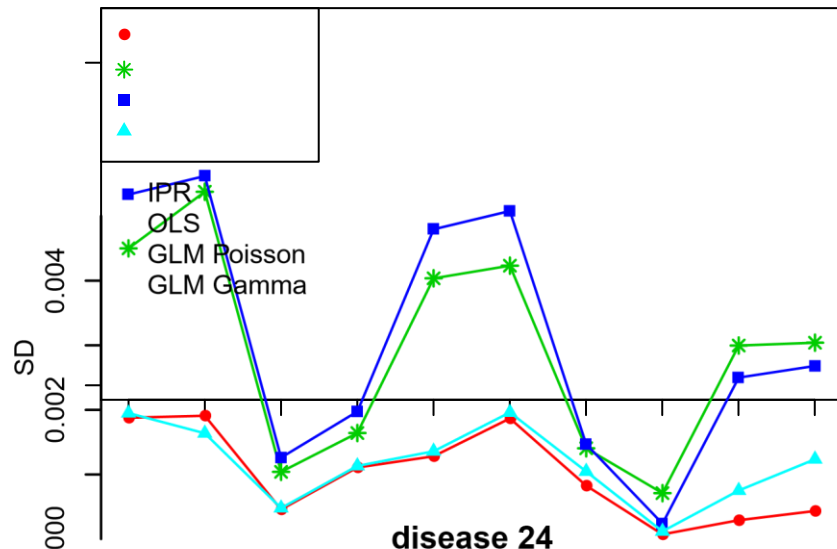

disease 24

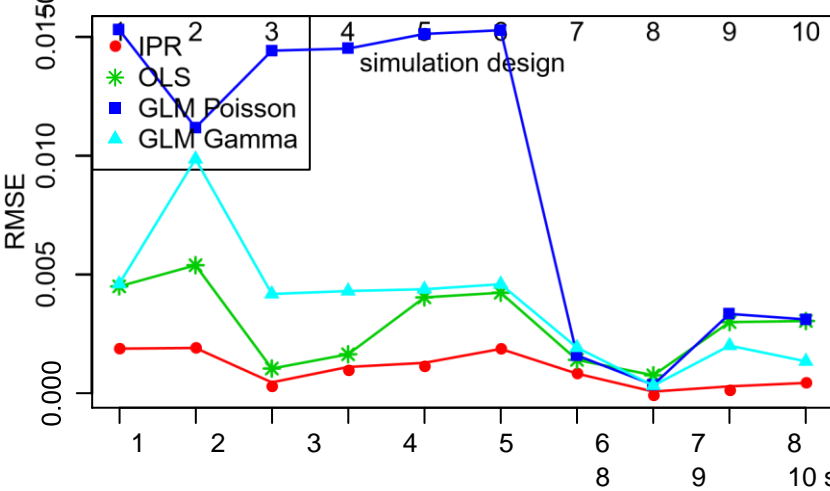

disease 24

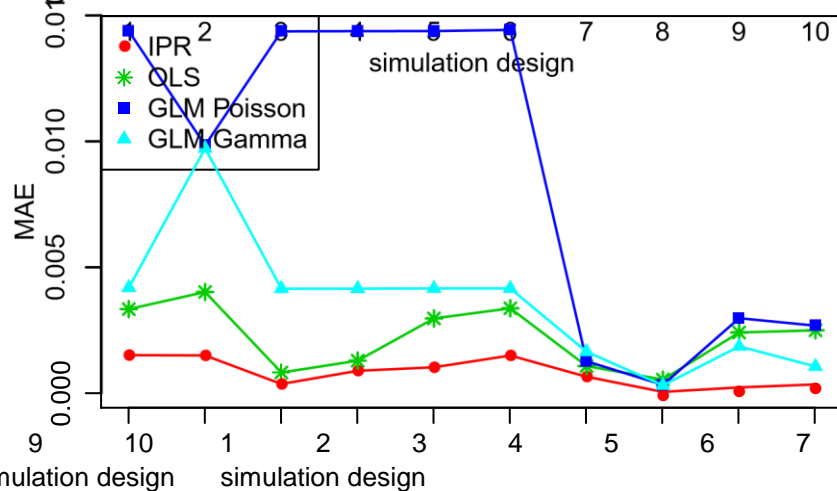

disease 25

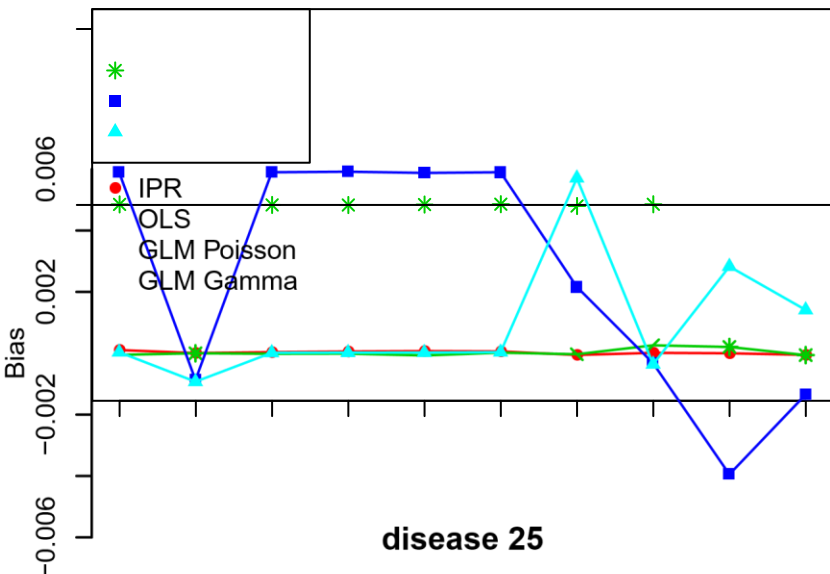

disease 25

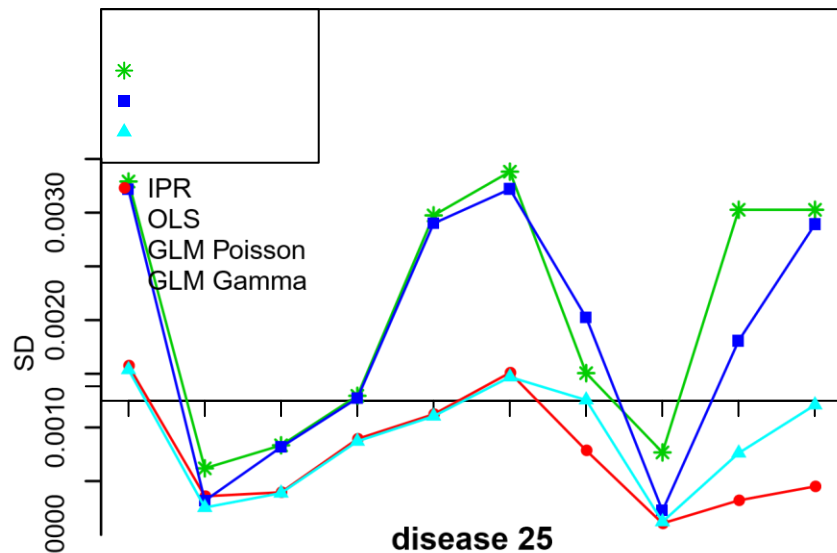

disease 25

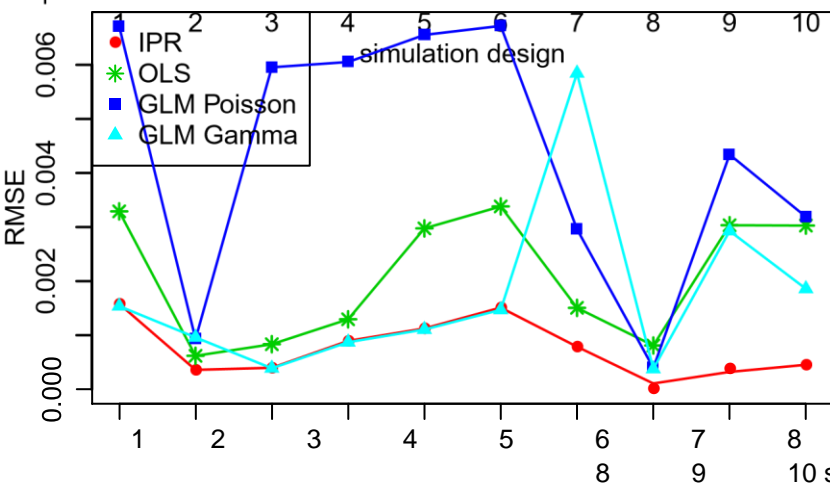

disease 25

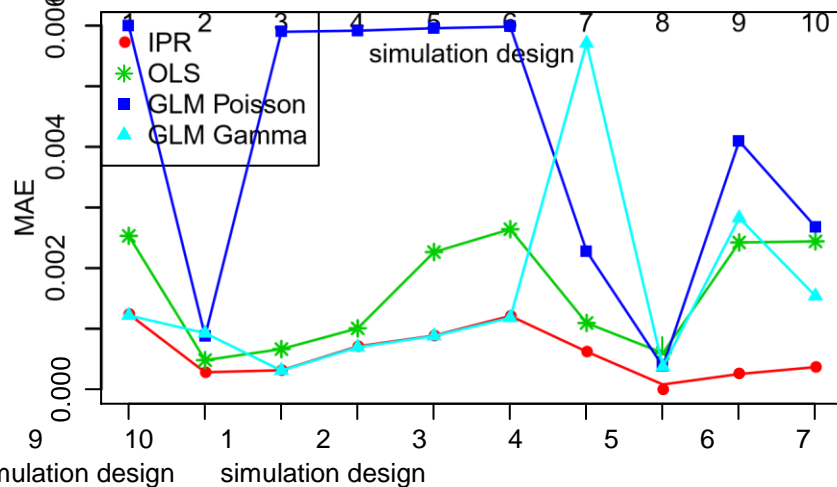

disease 26

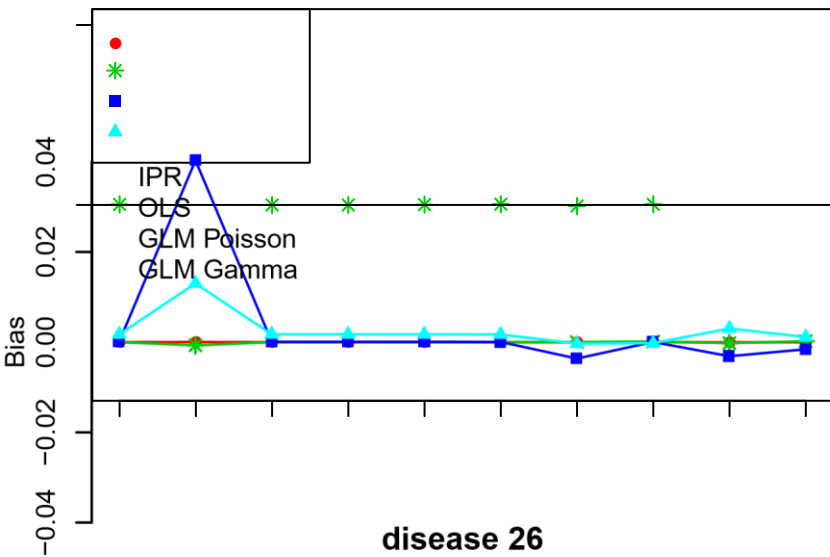

disease 26

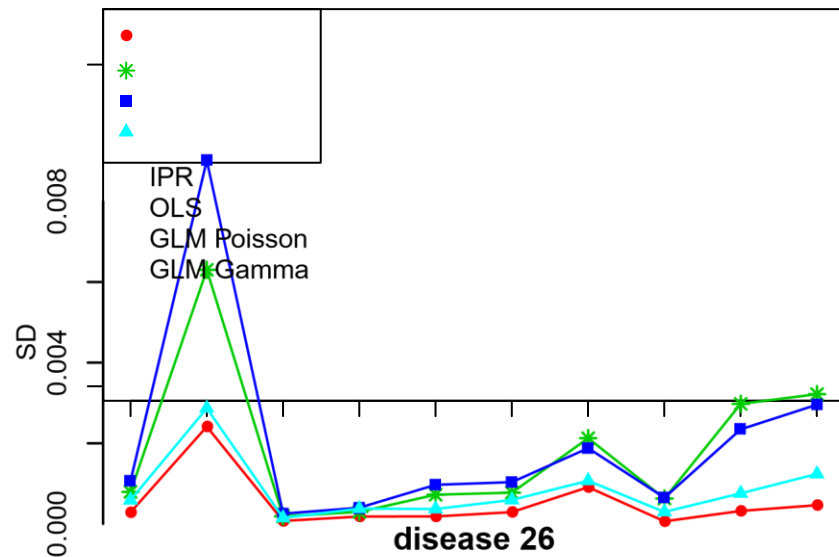

disease 26

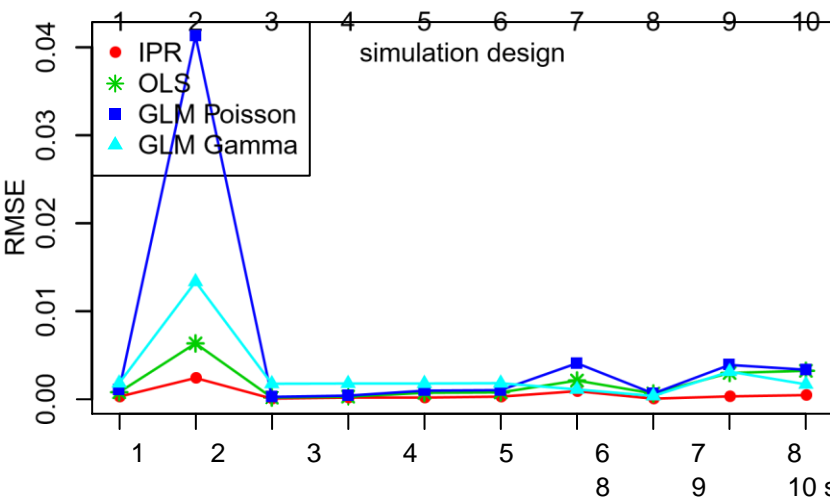

disease 26

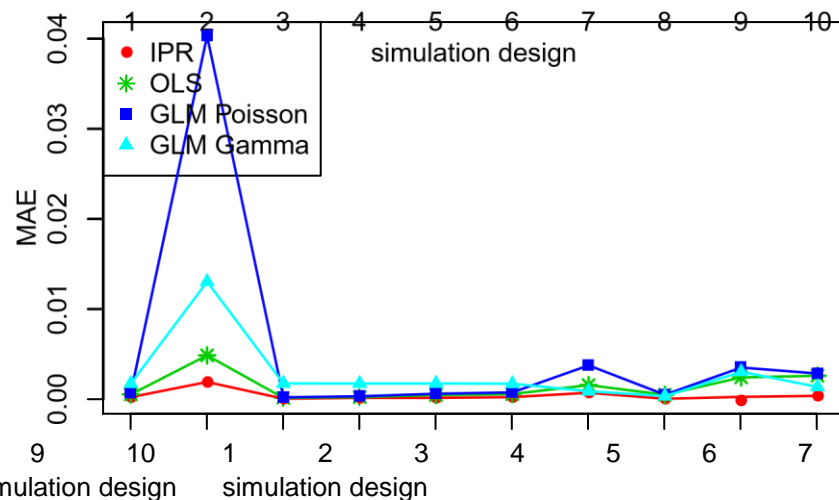

disease 27

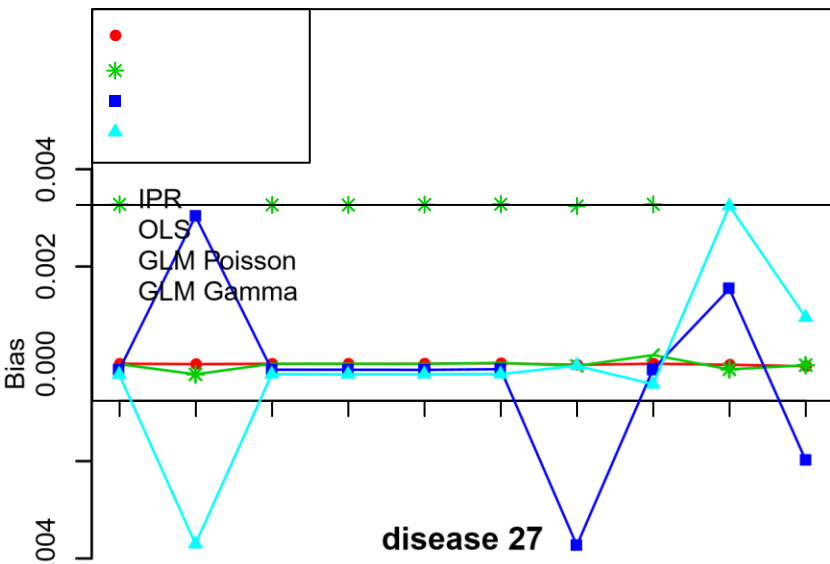

disease 27

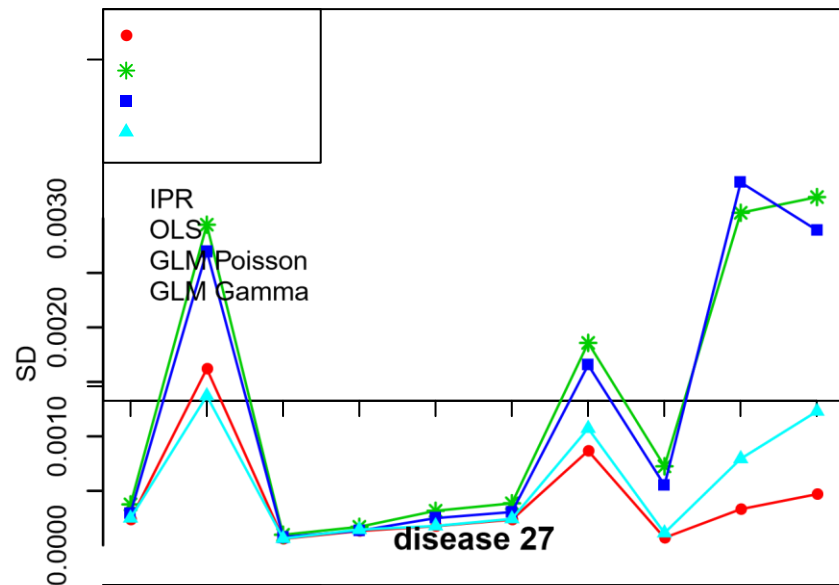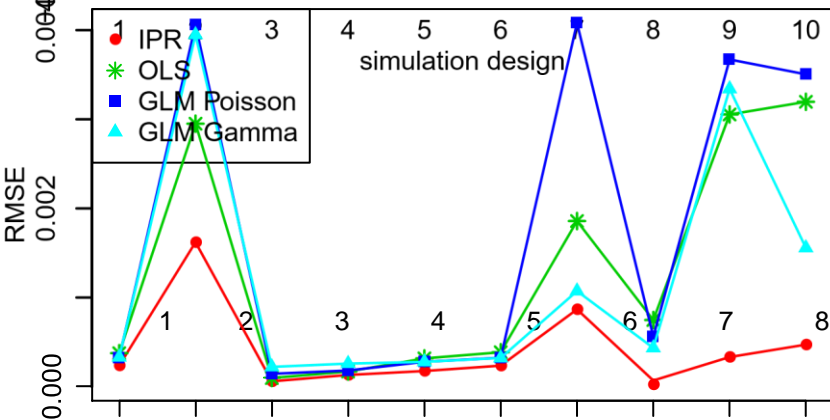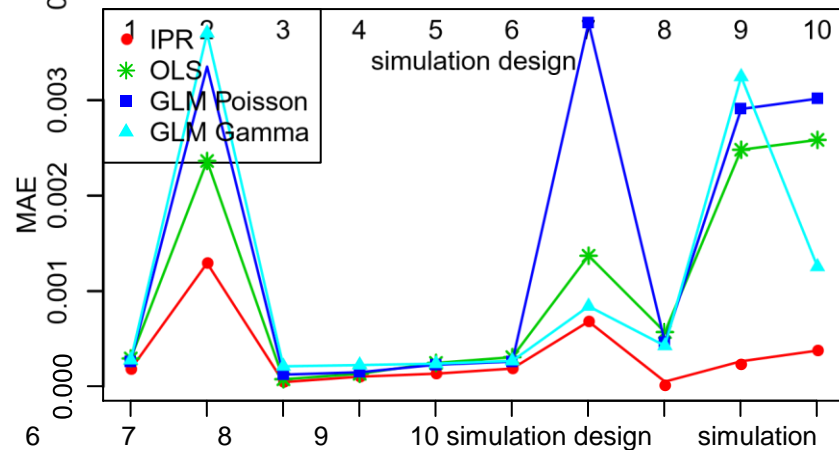

design

disease 28

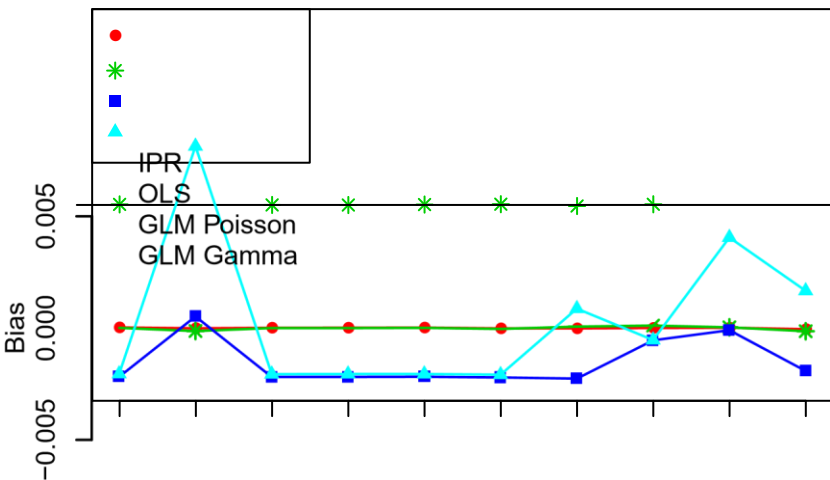

disease 28

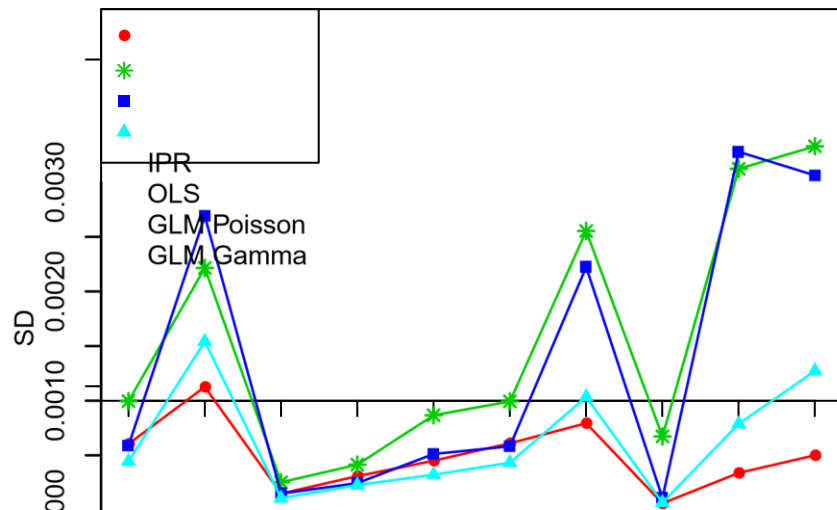

disease 28

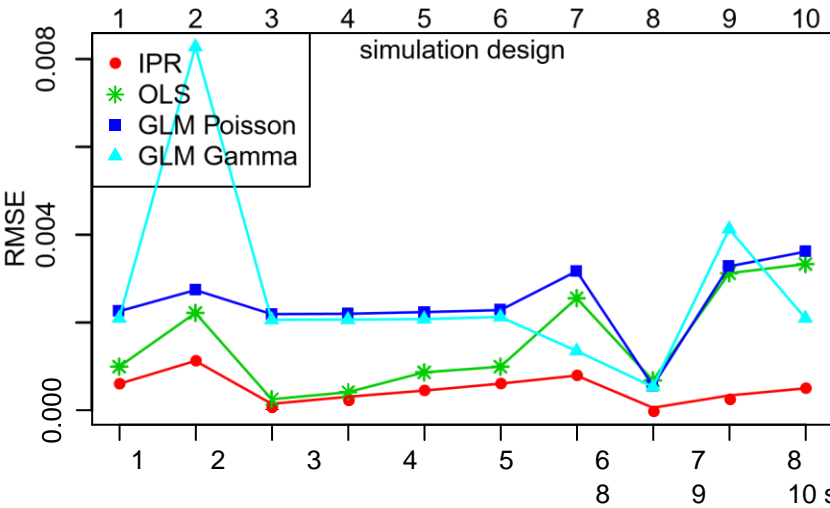

disease 28

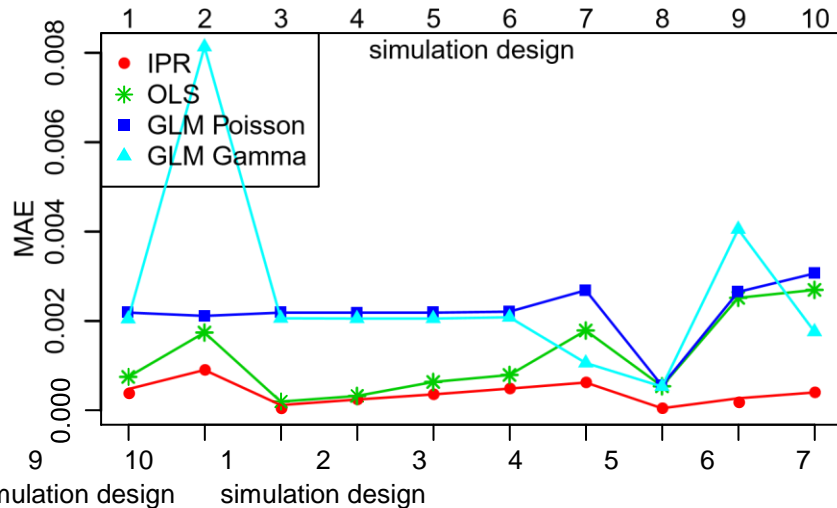



disease 29

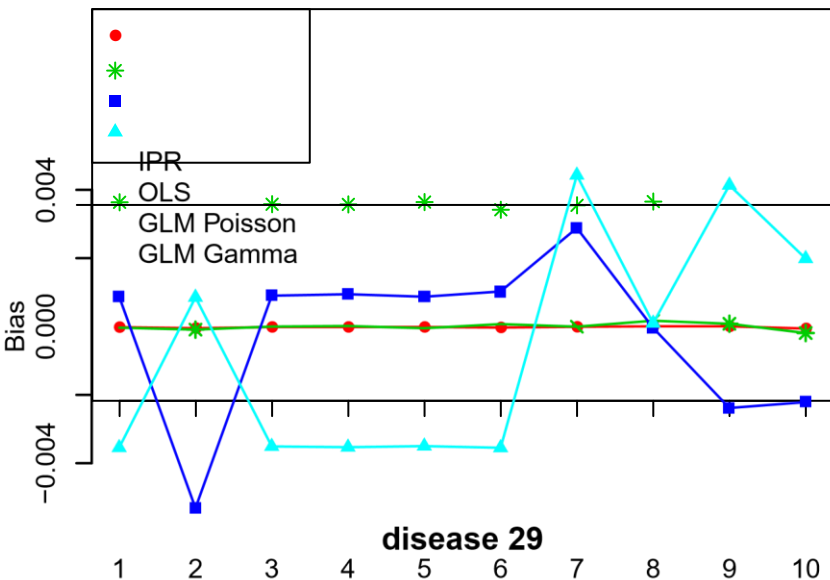

disease 29

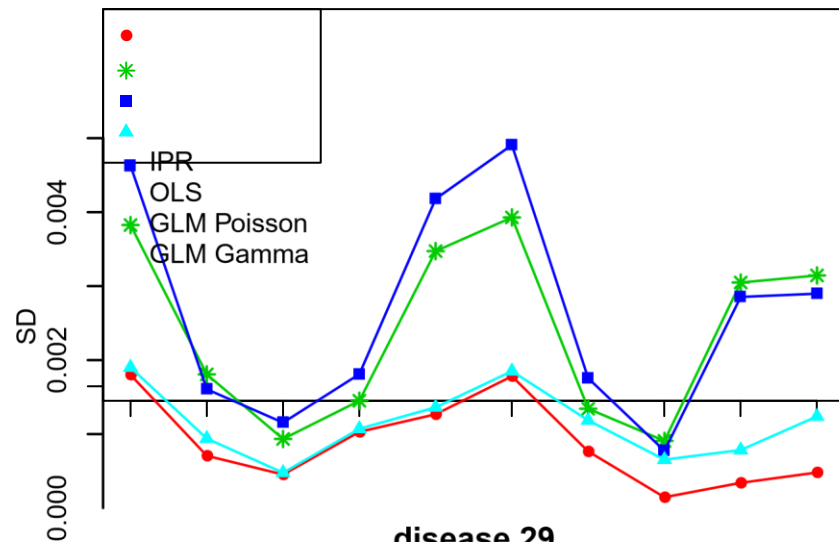

disease 29

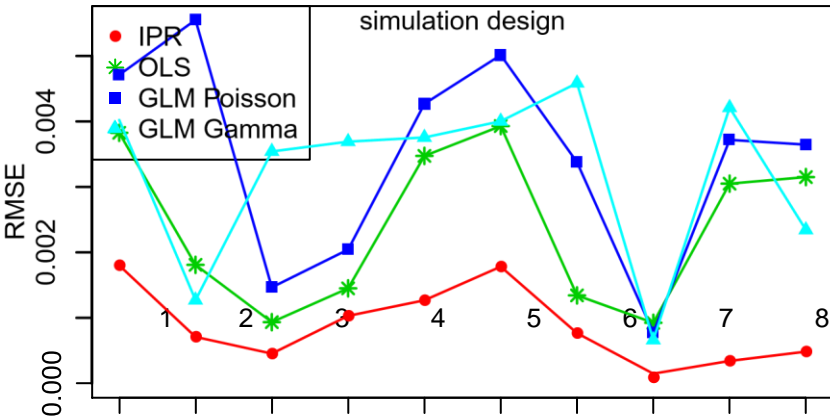

disease 29

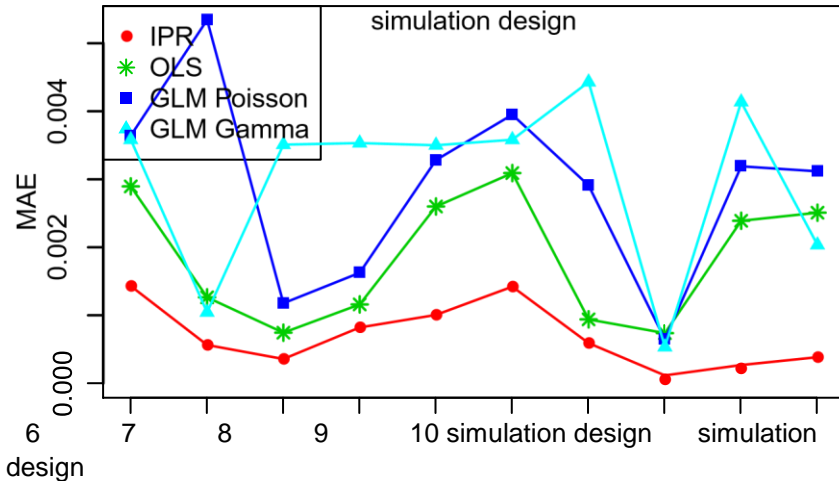

disease 30

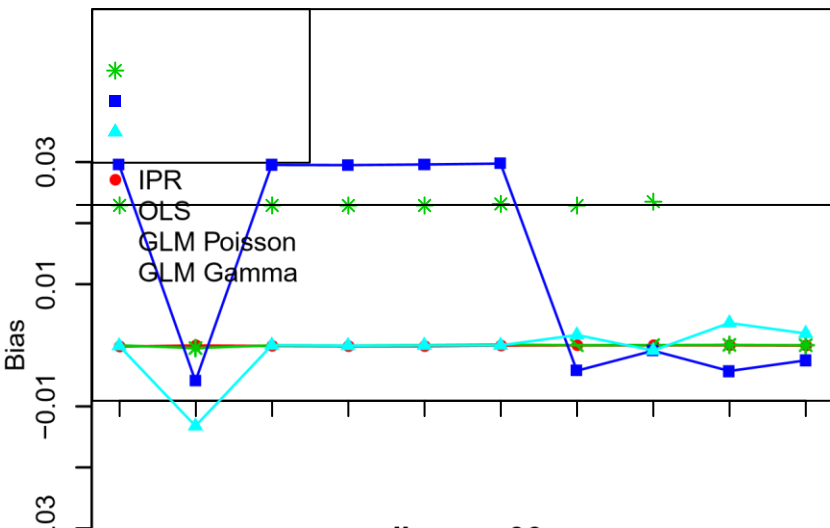

disease 30

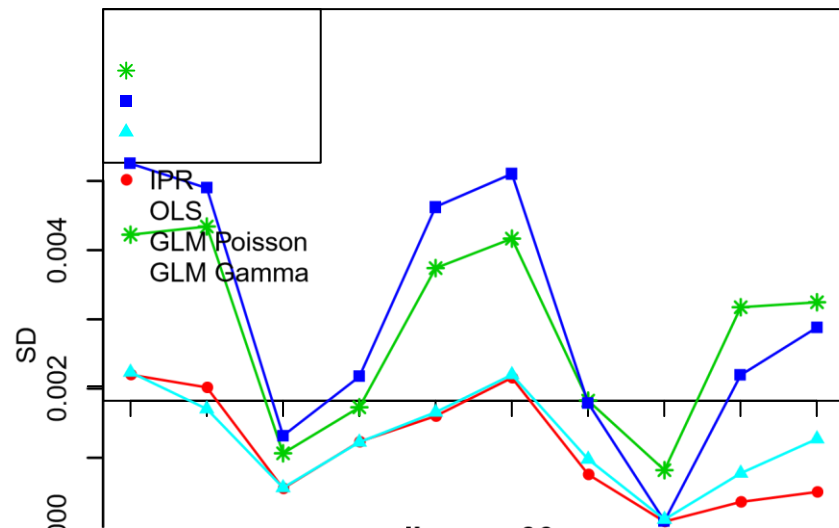

disease 30

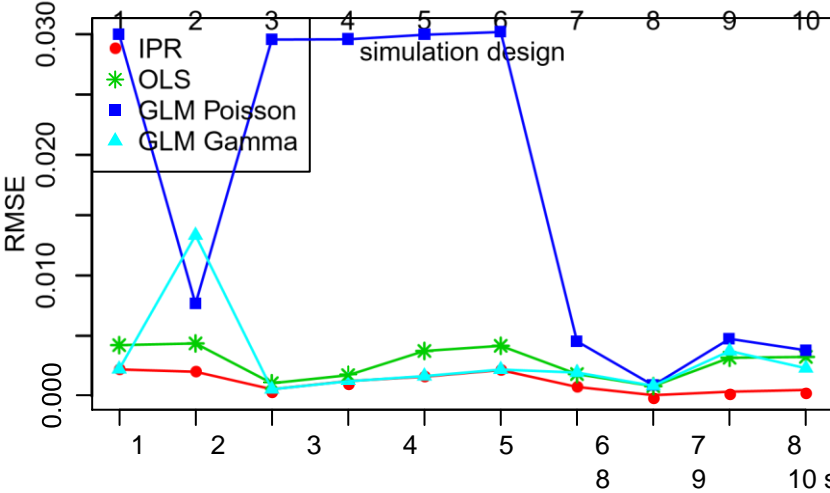

disease 30

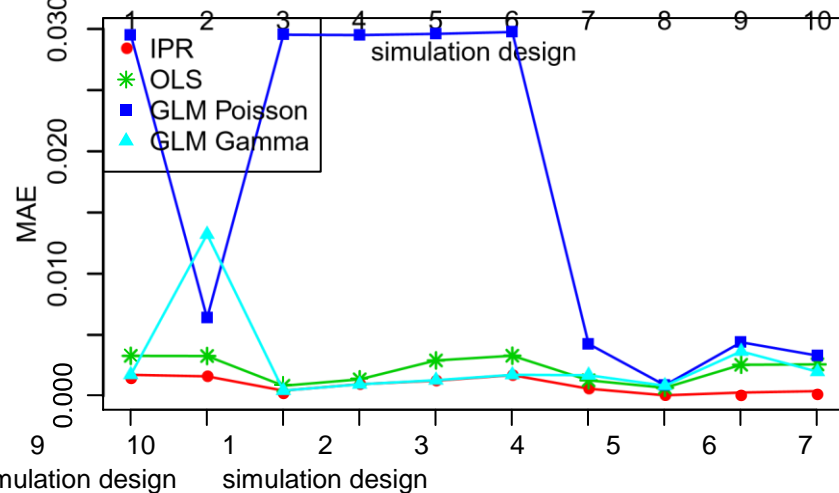

disease 31

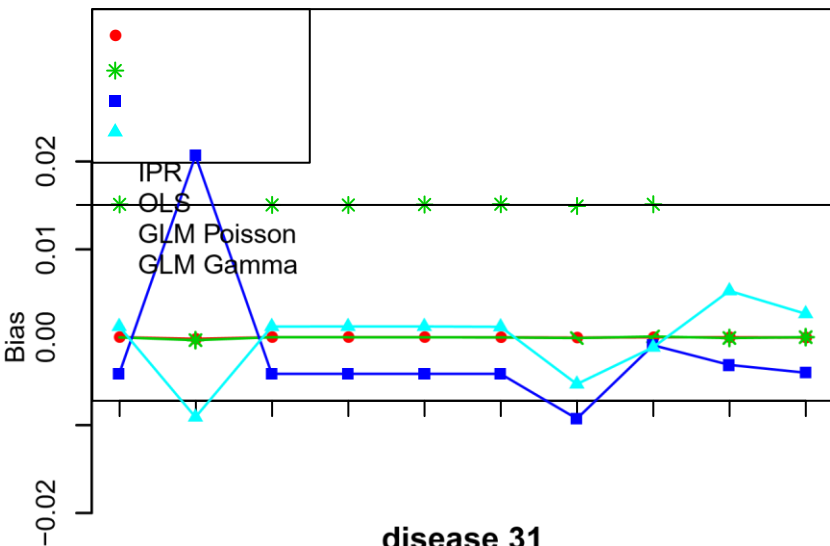

disease 31

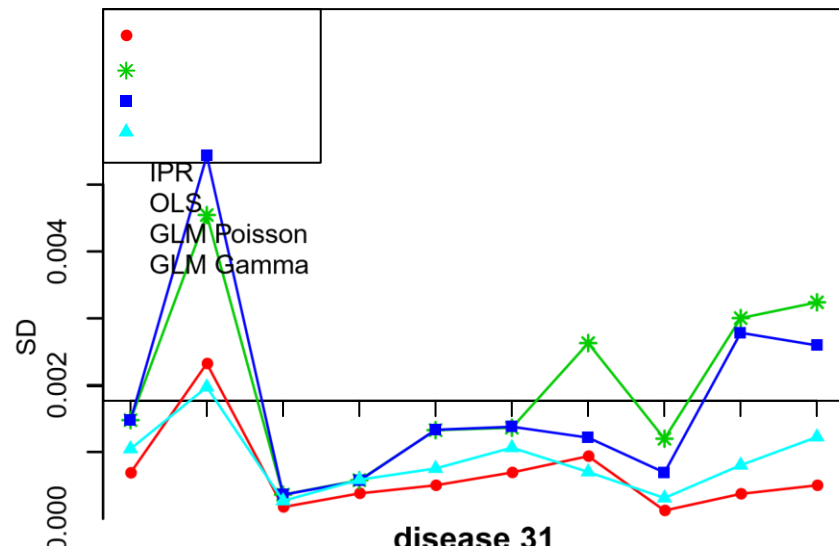

disease 31

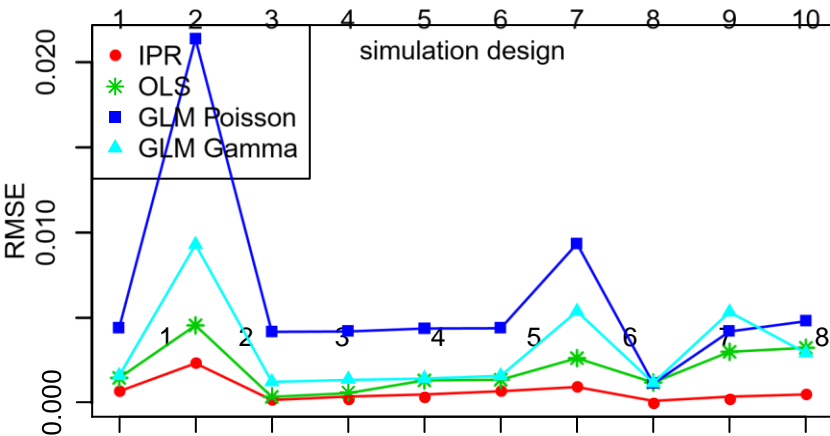

disease 31

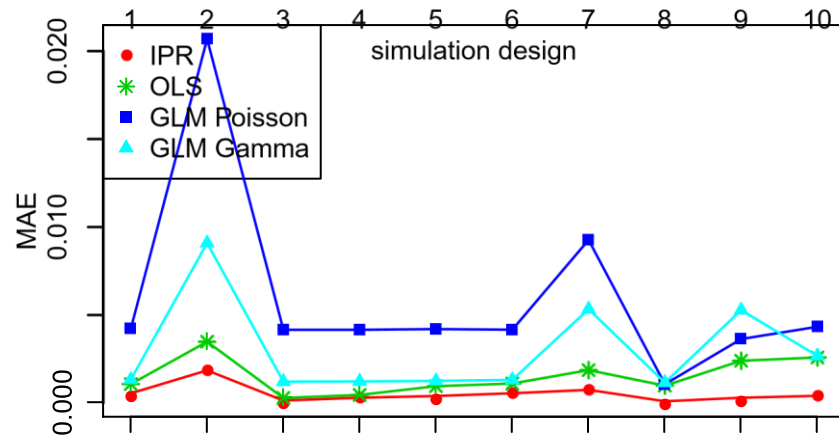

design

disease 32

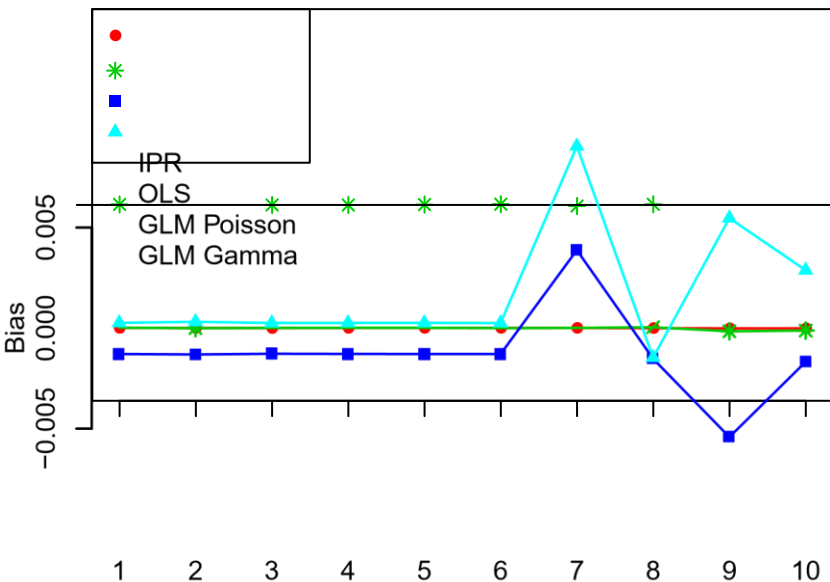

disease 32

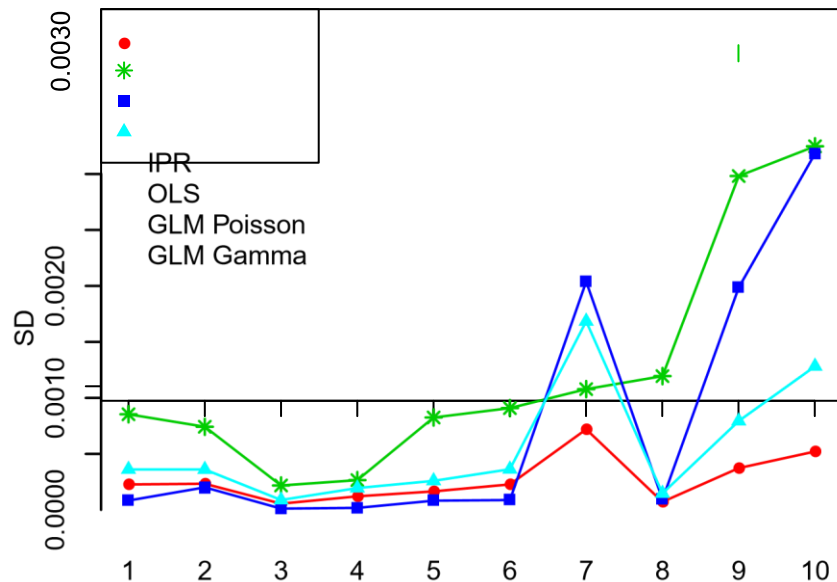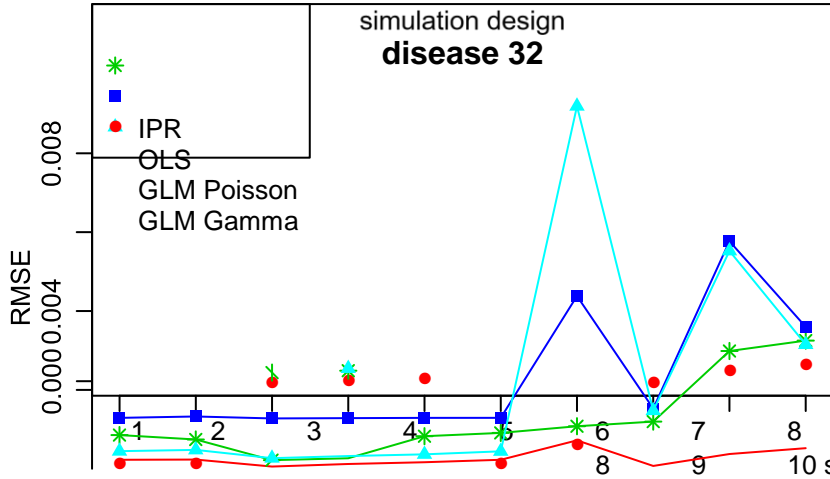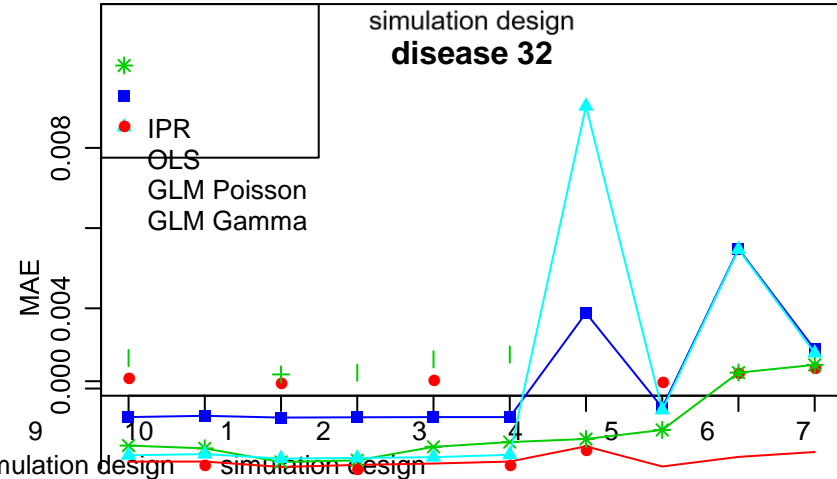

disease 33

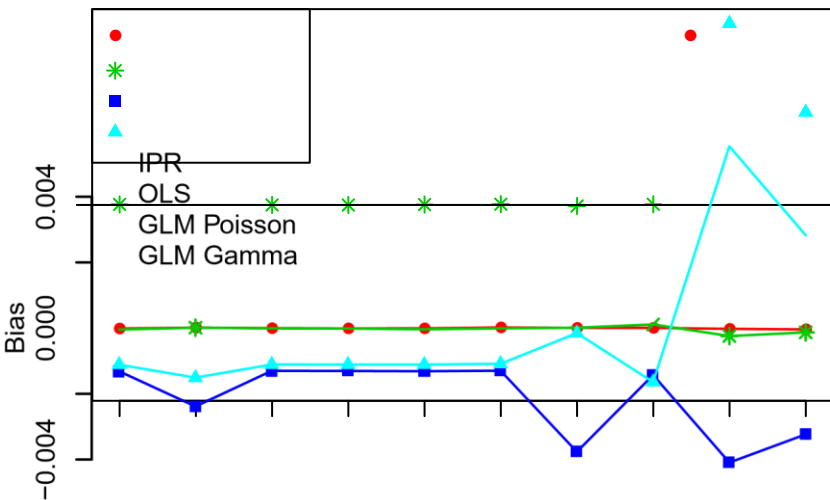

disease 33

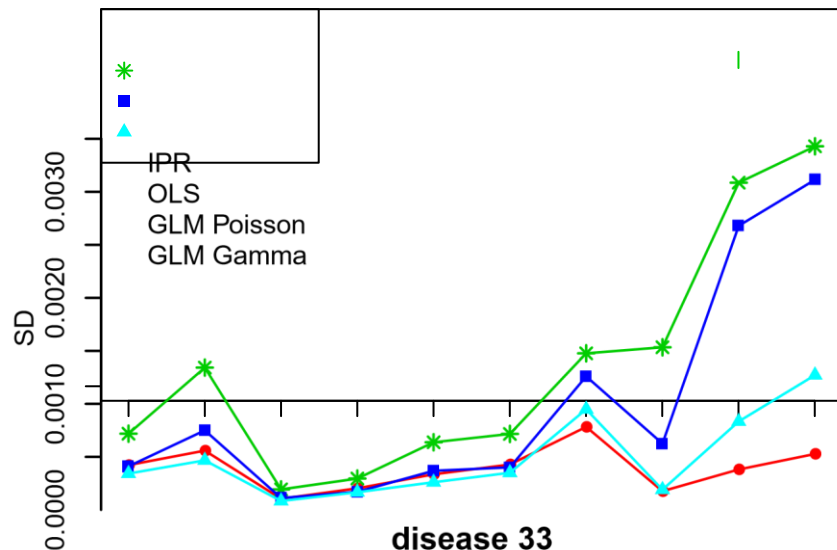

disease 33

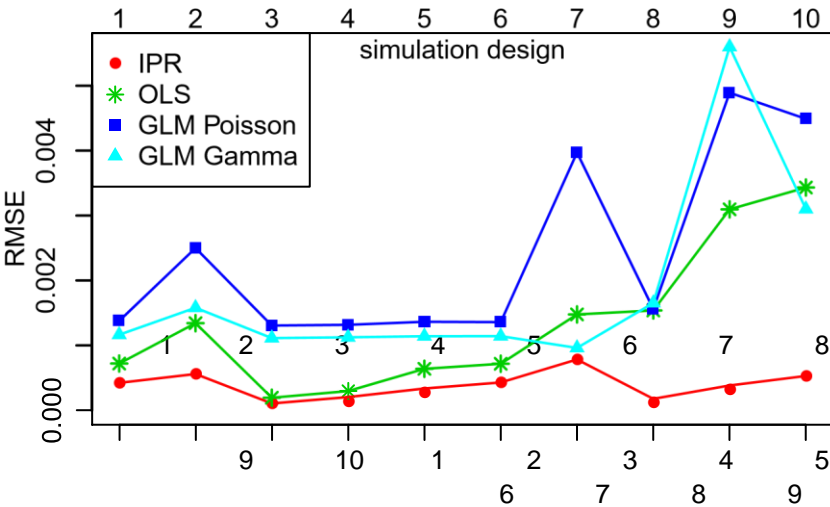

disease 33

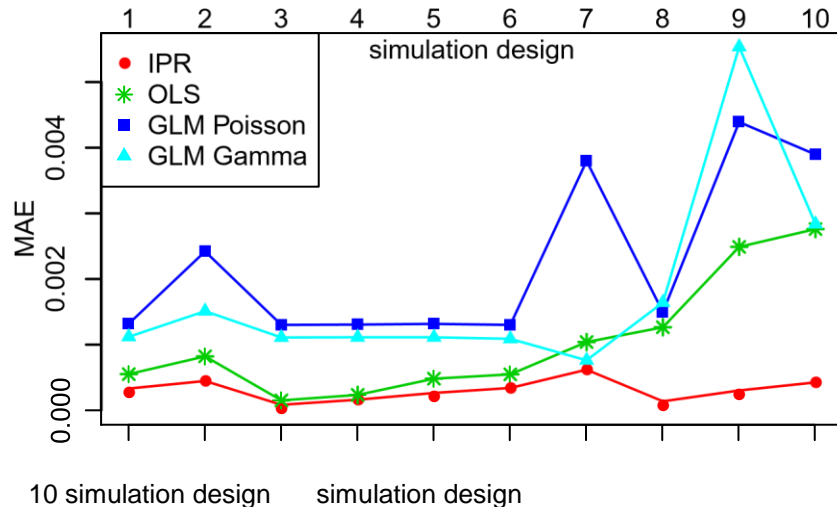

disease 34

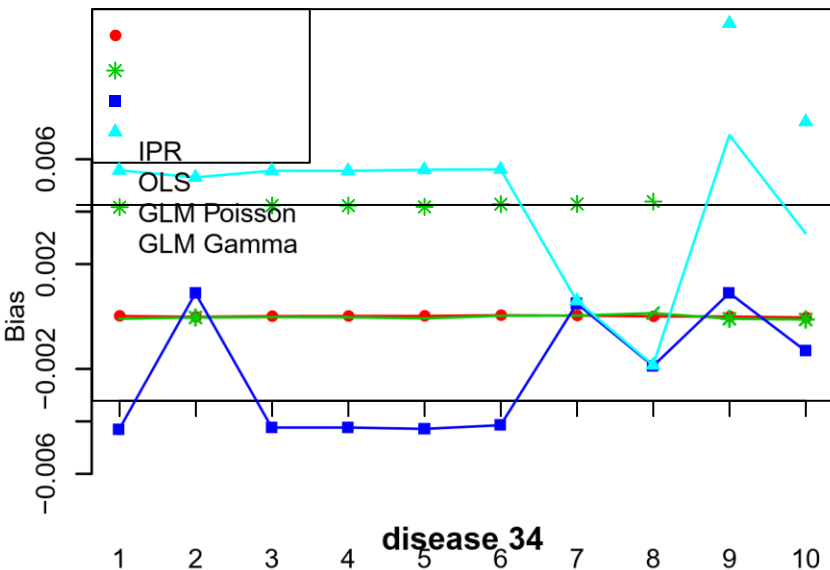

disease 34

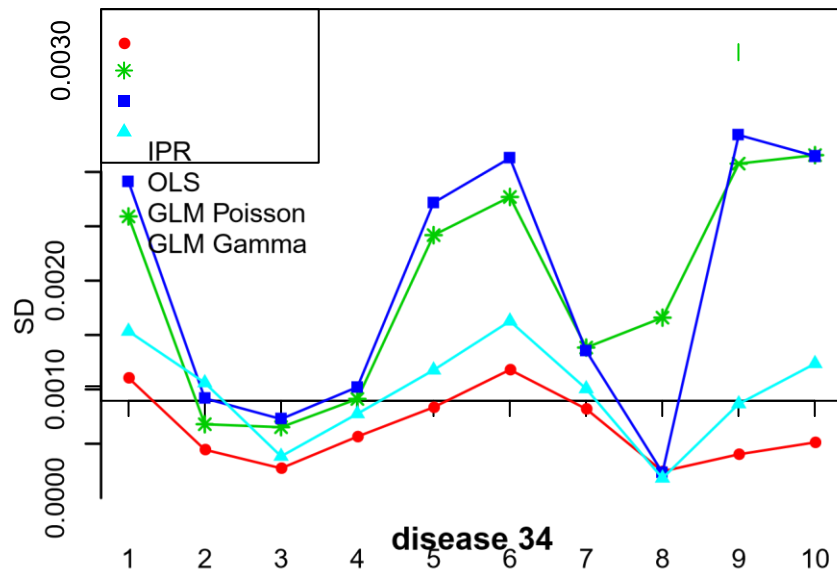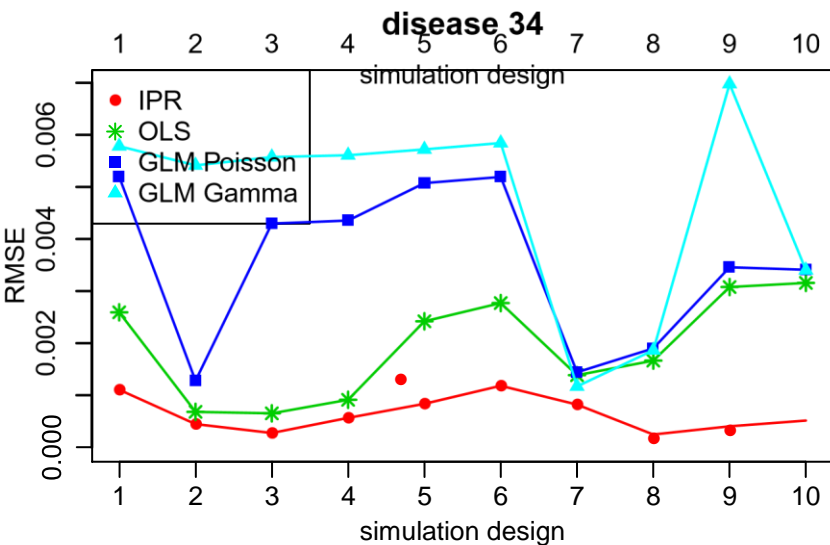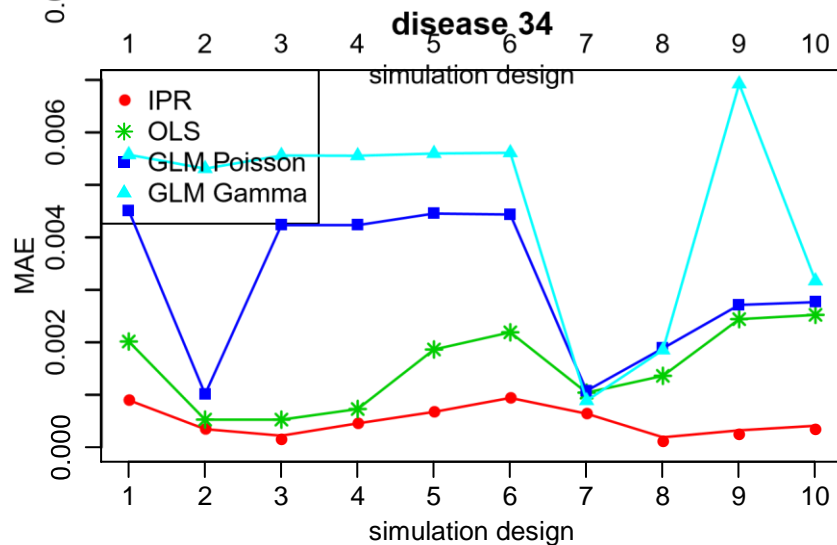

disease 35

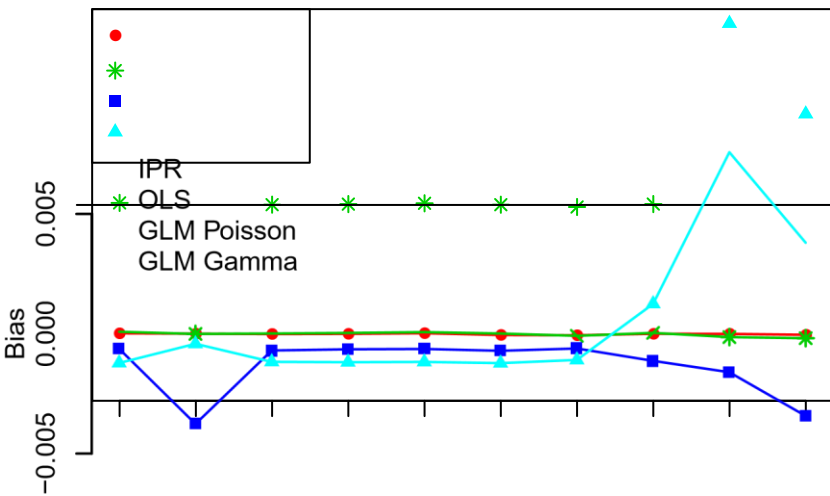

disease 35

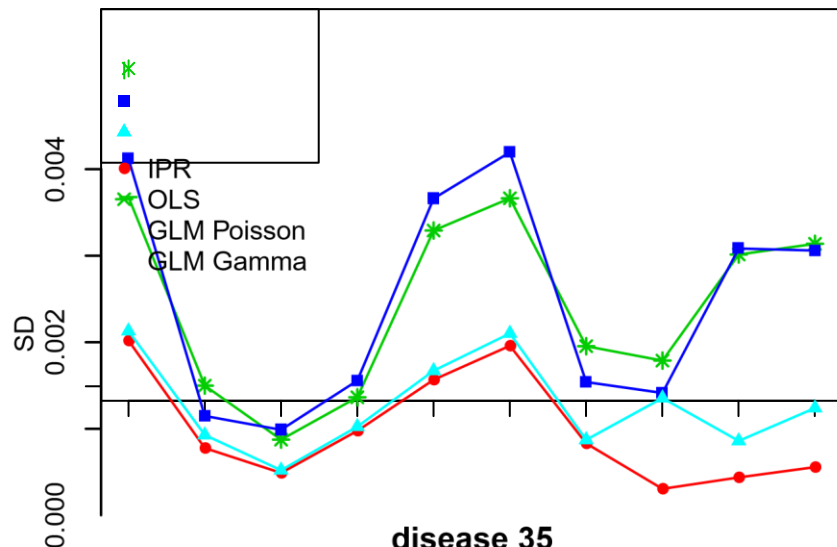

disease 35

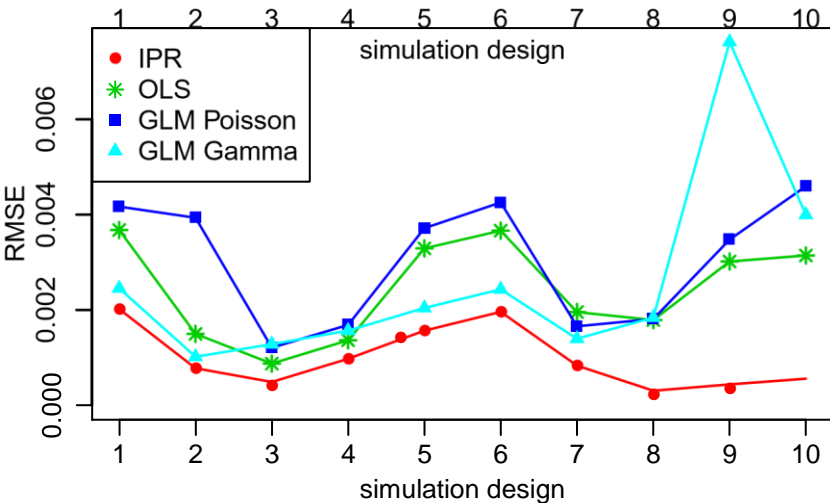

disease 35

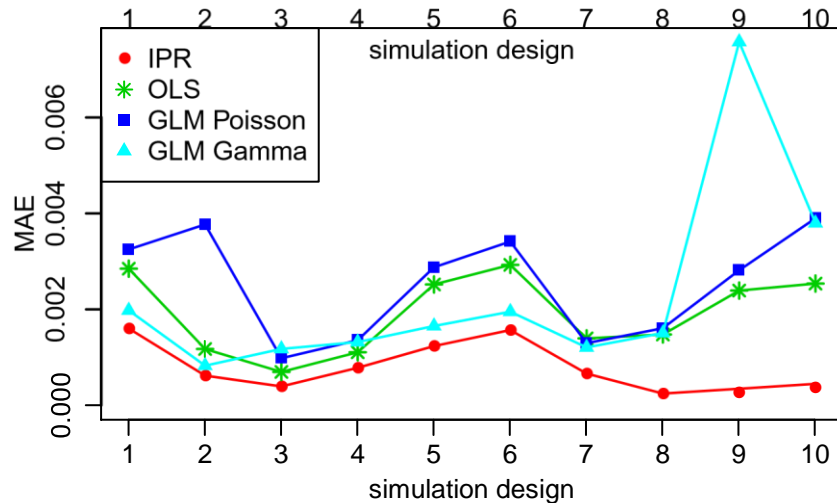

disease 36

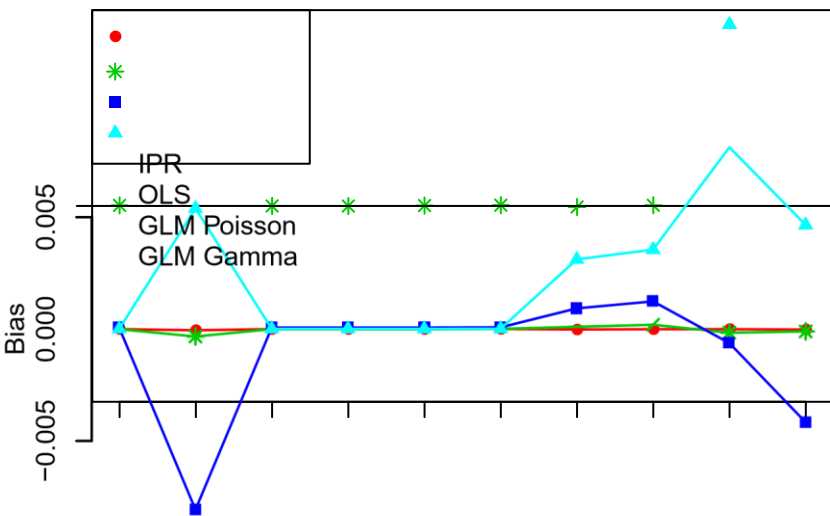

disease 36

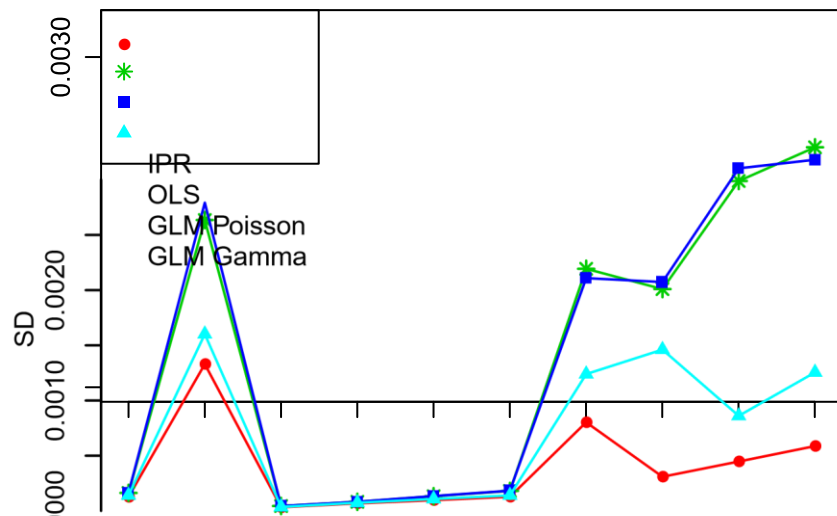

disease 36

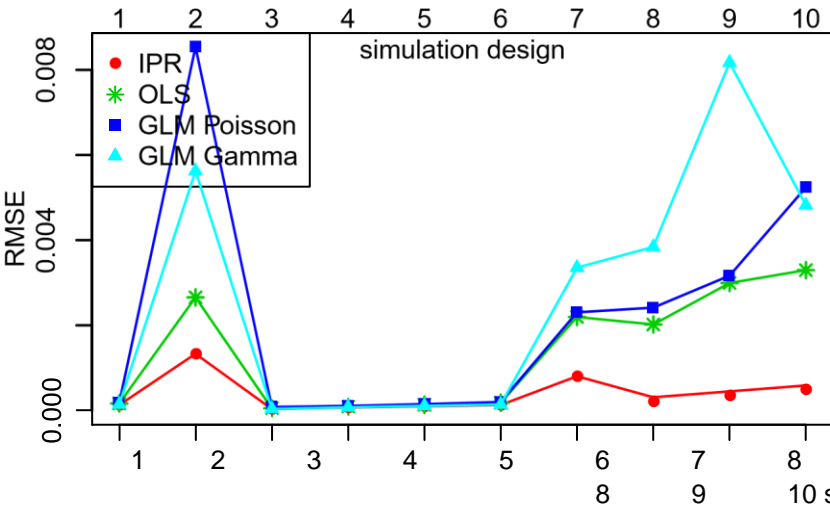

disease 36

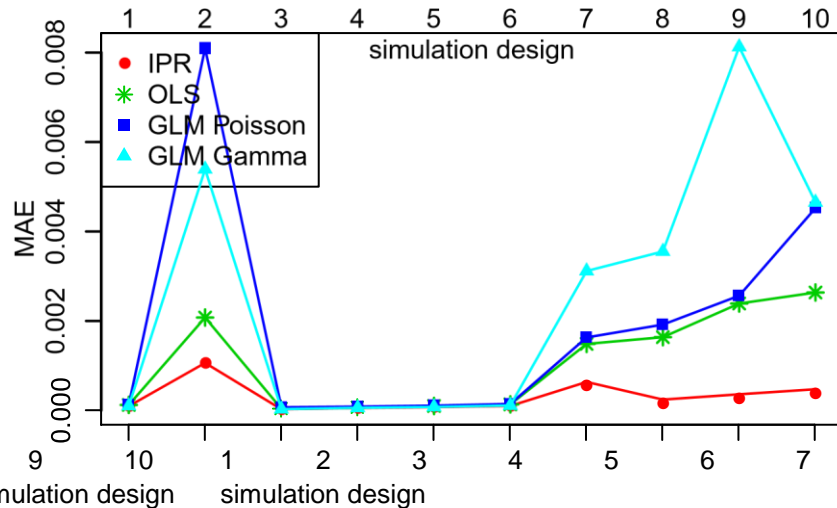



disease 37

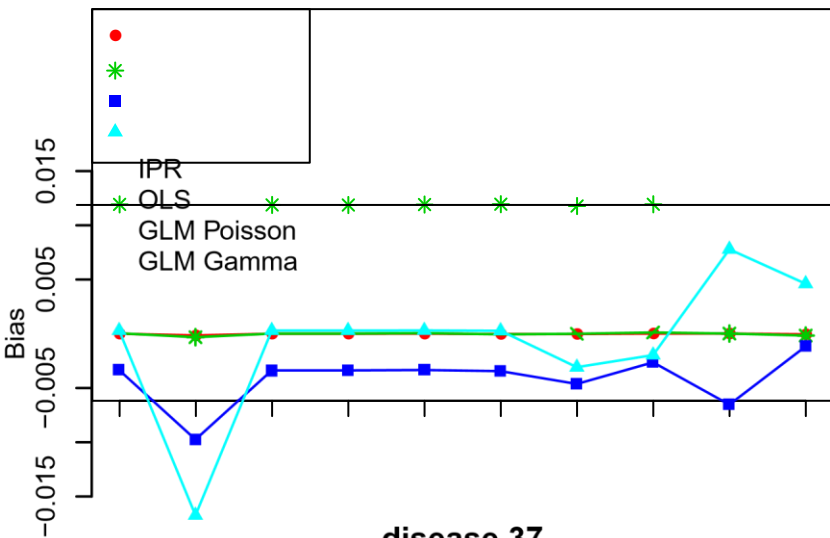

disease 37

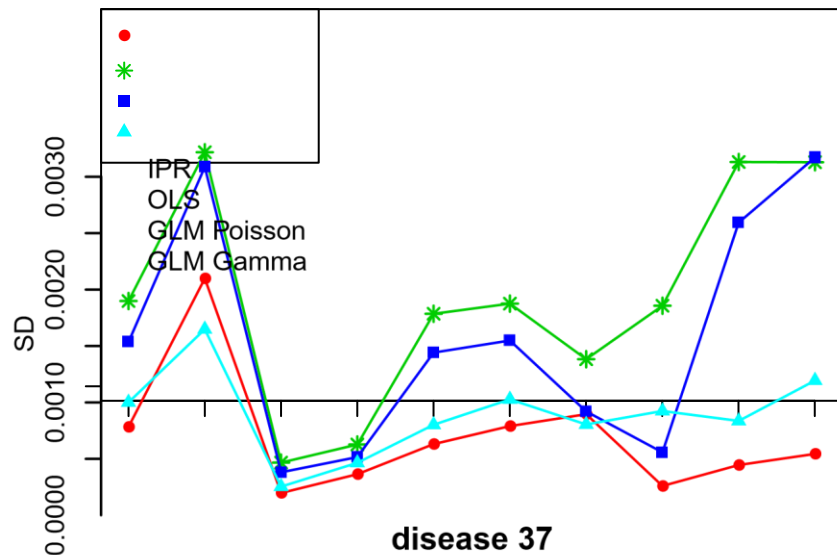

disease 37

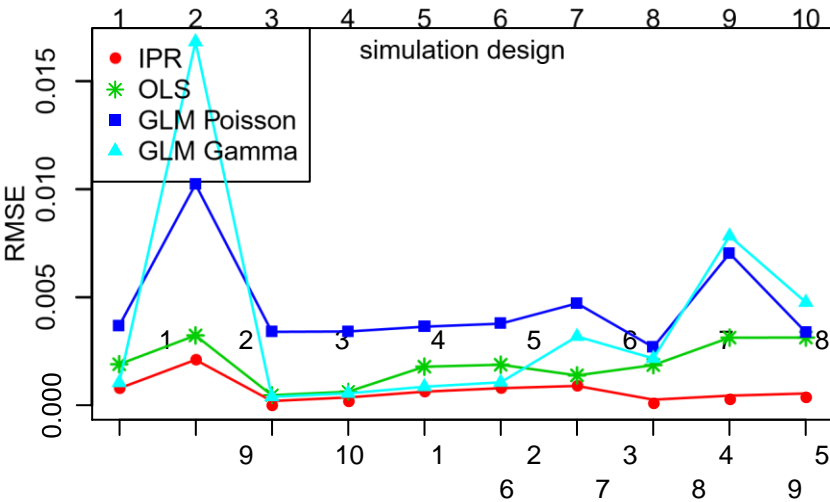

disease 37

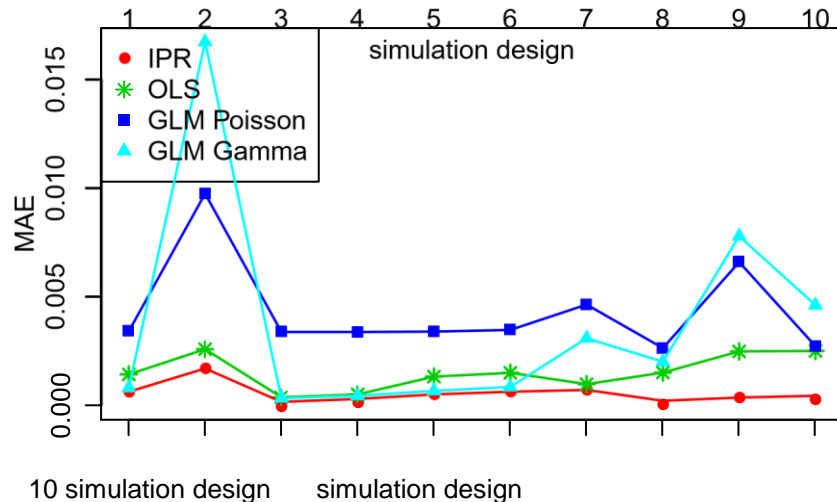

disease 38

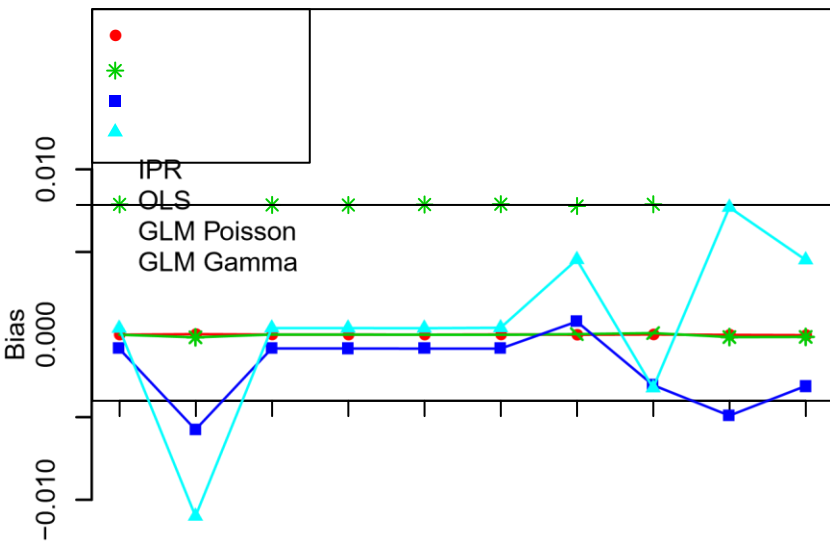

disease 38

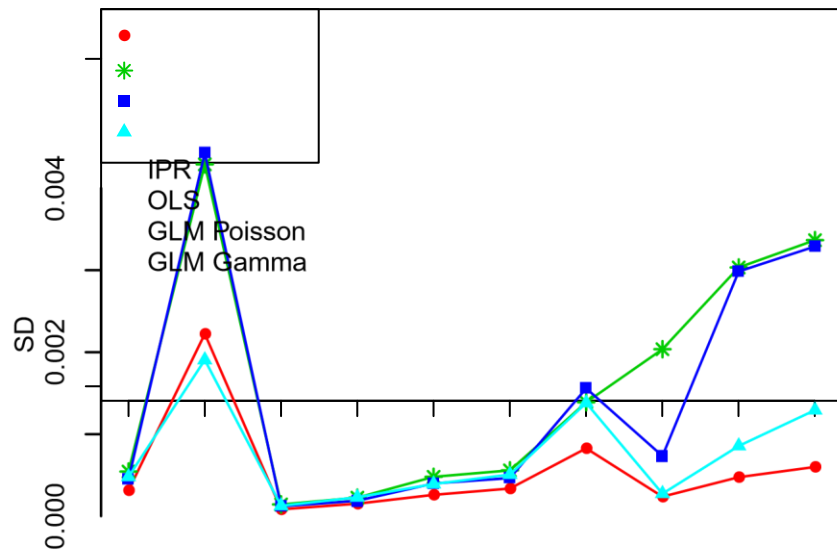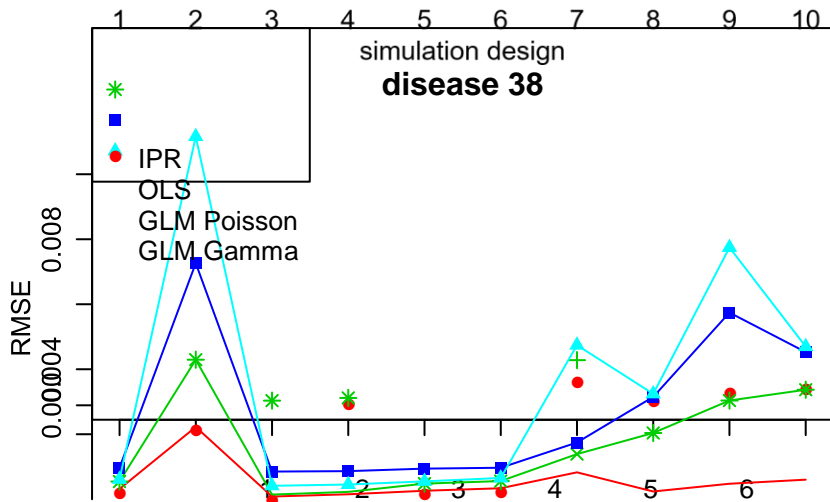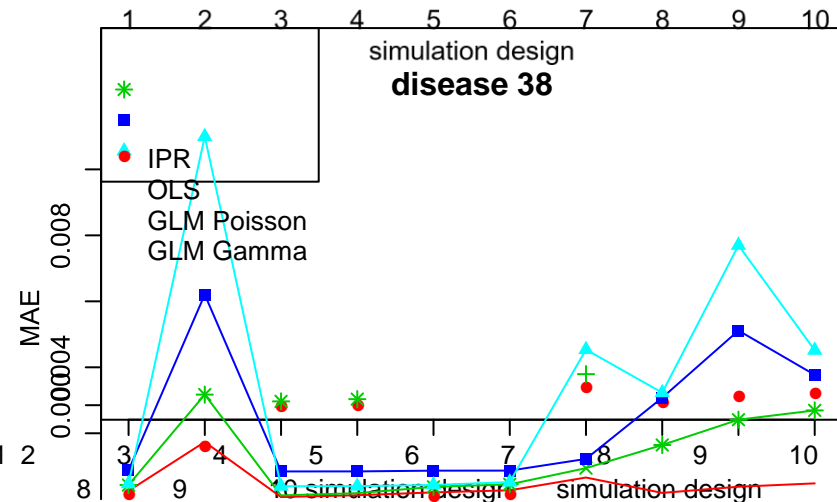

disease 39

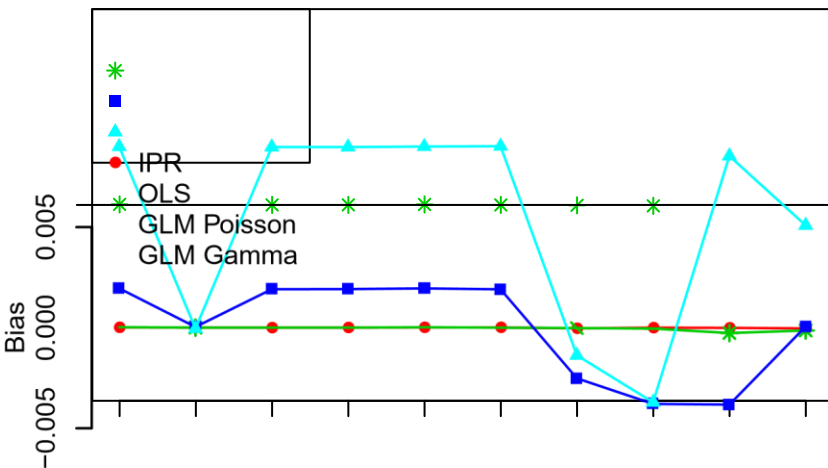

disease 39

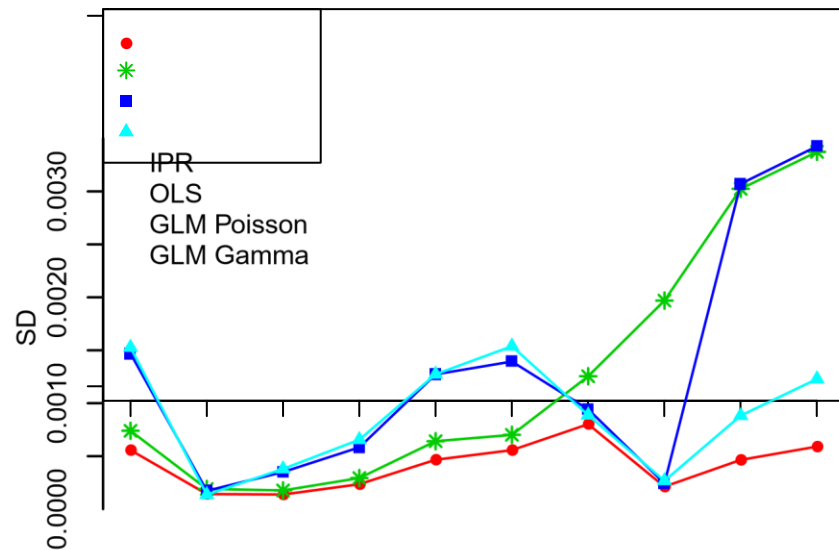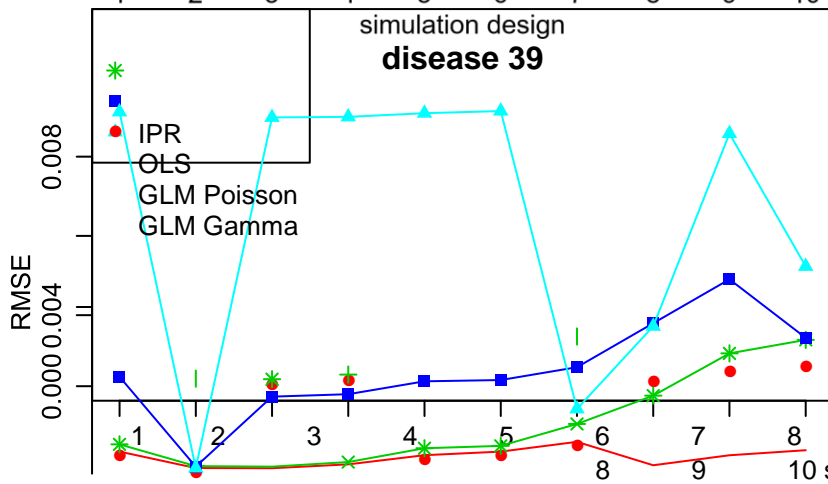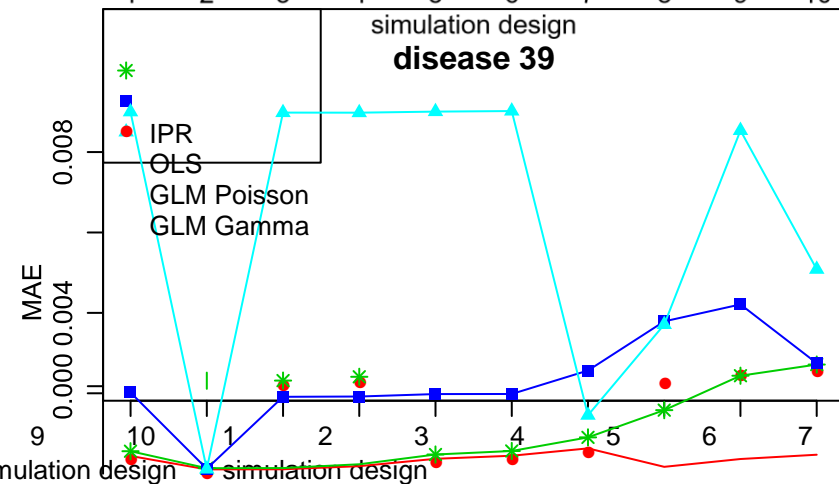

disease 40

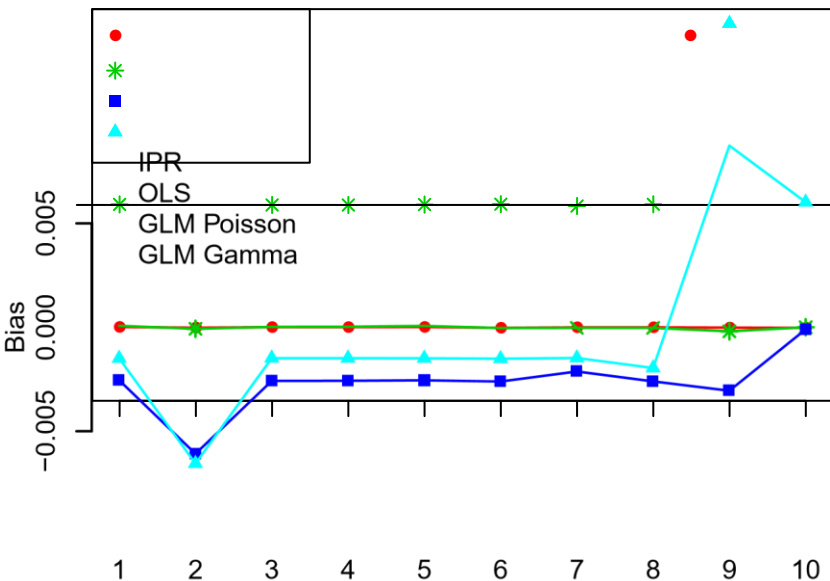

disease 40

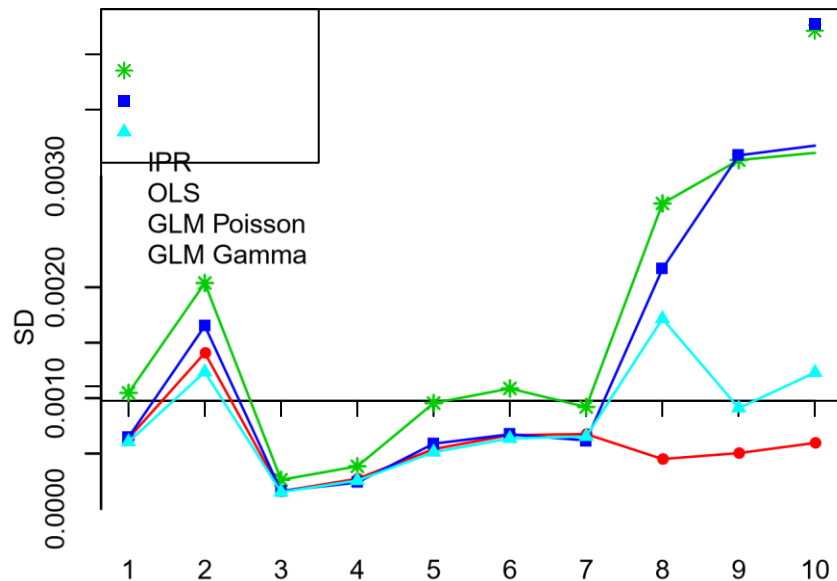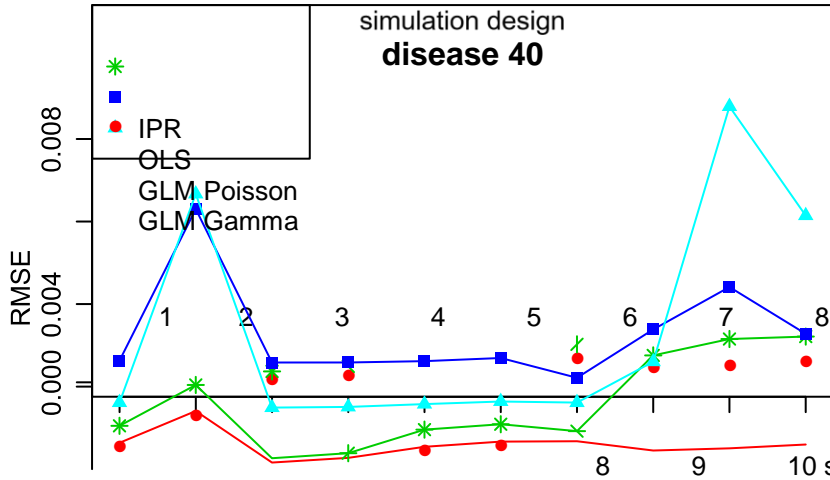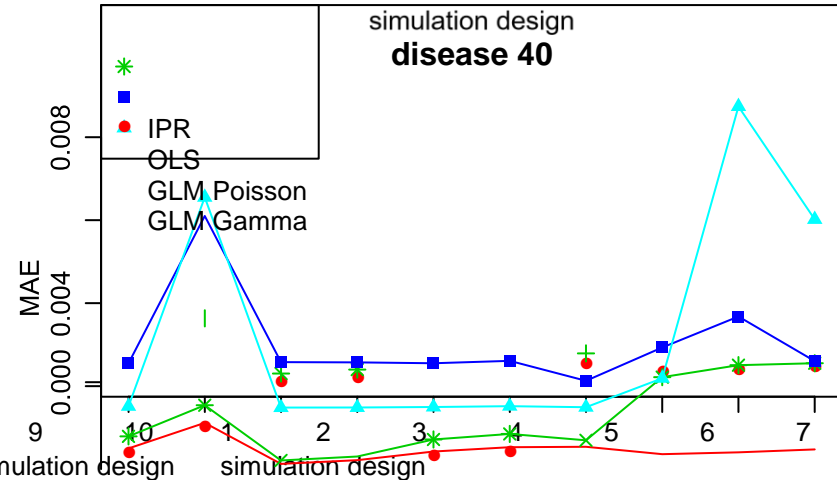

disease 41

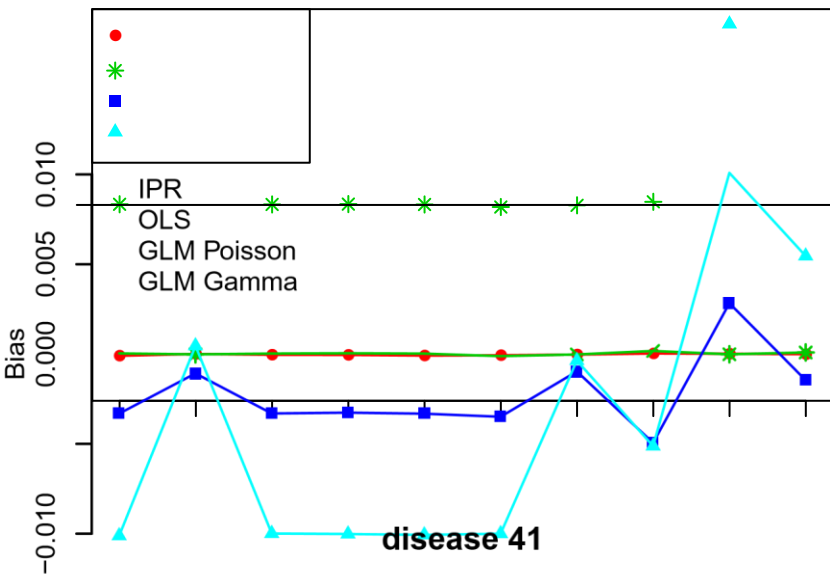

disease 41

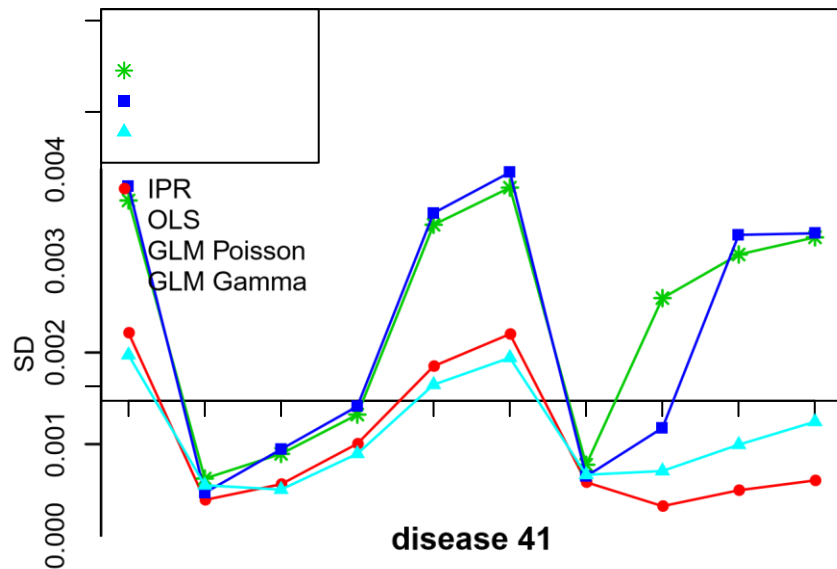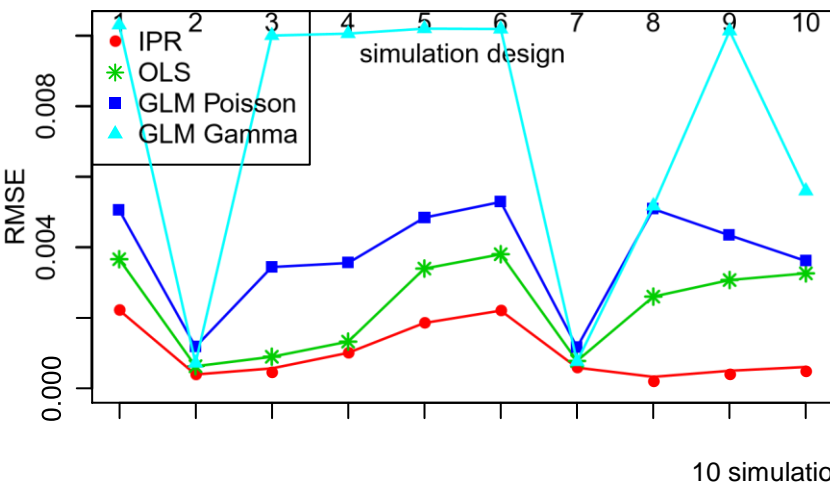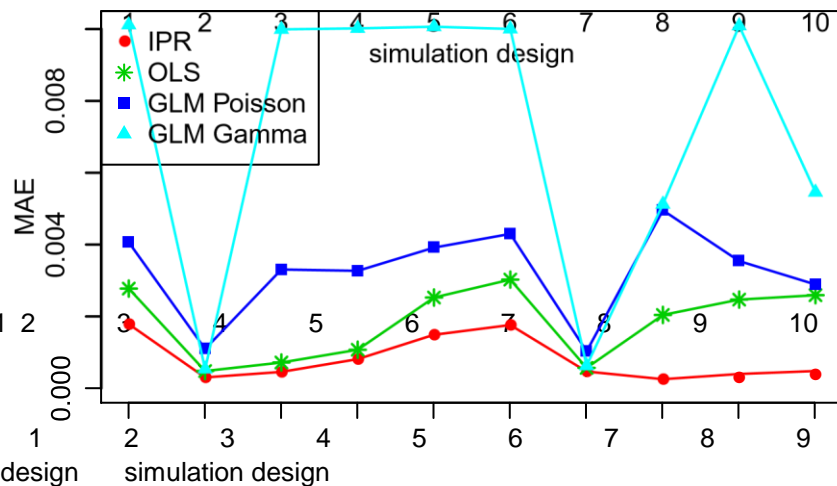

disease 42

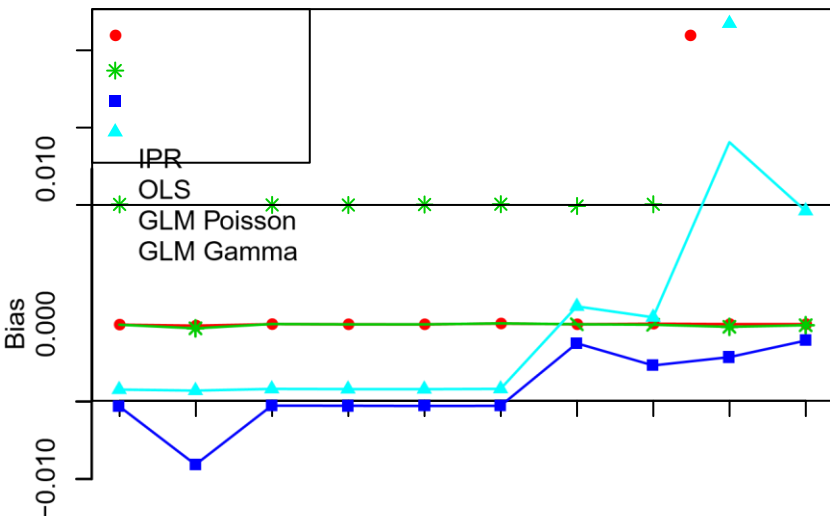

disease 42

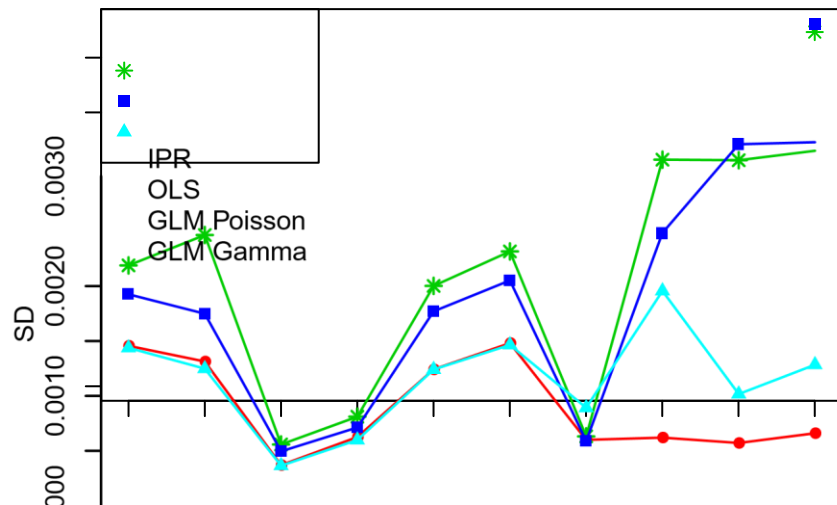

disease 42

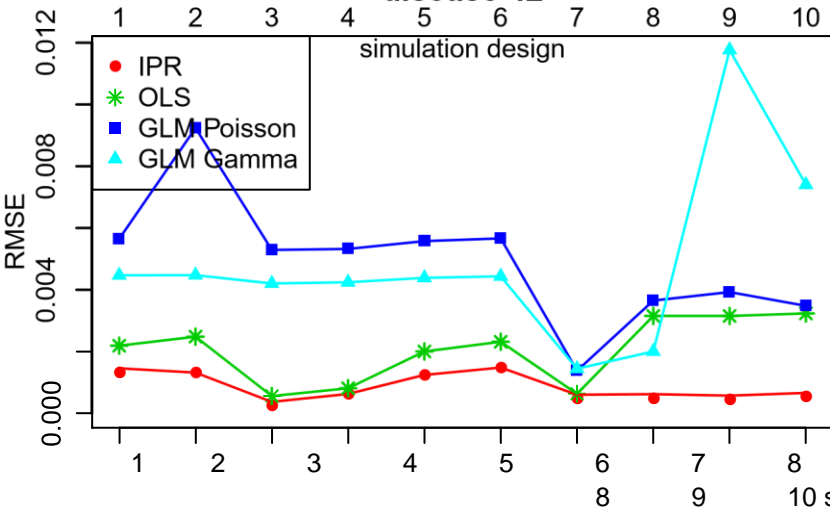

disease 42

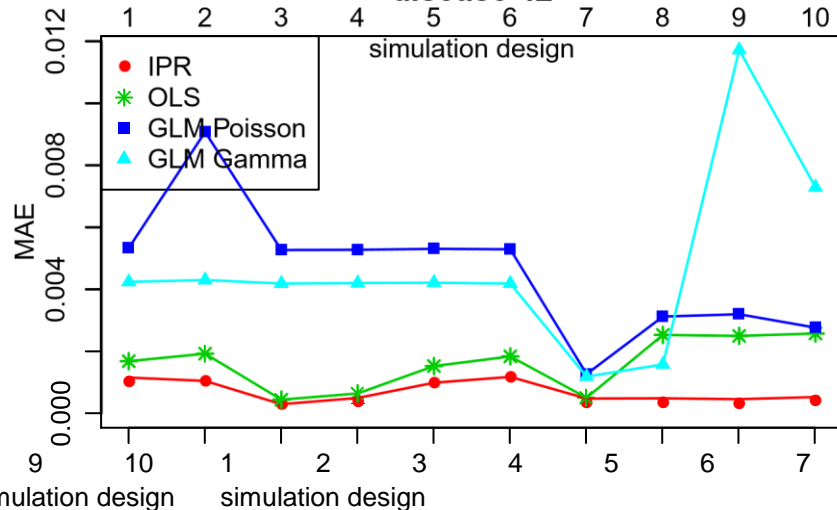

disease 43

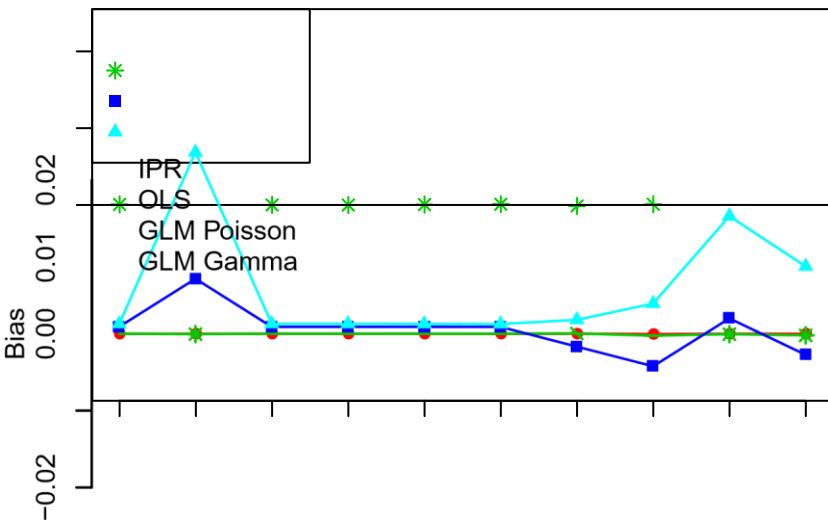

disease 43

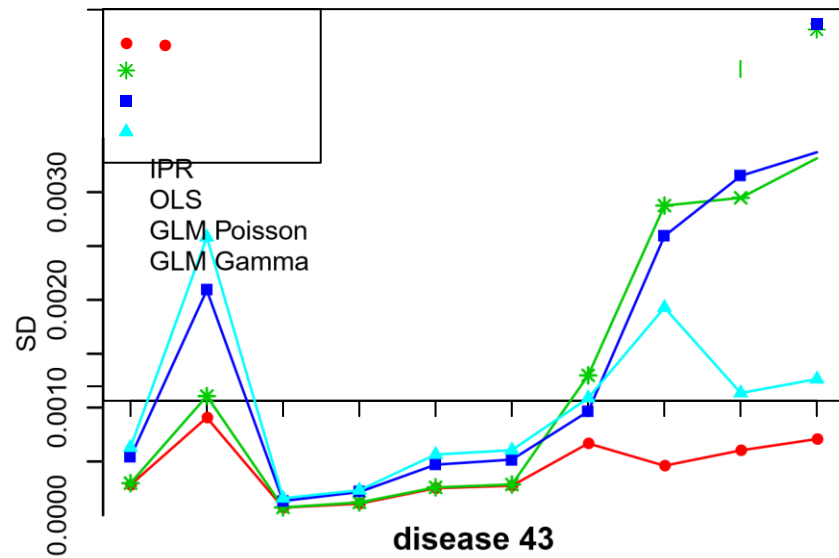

disease 43

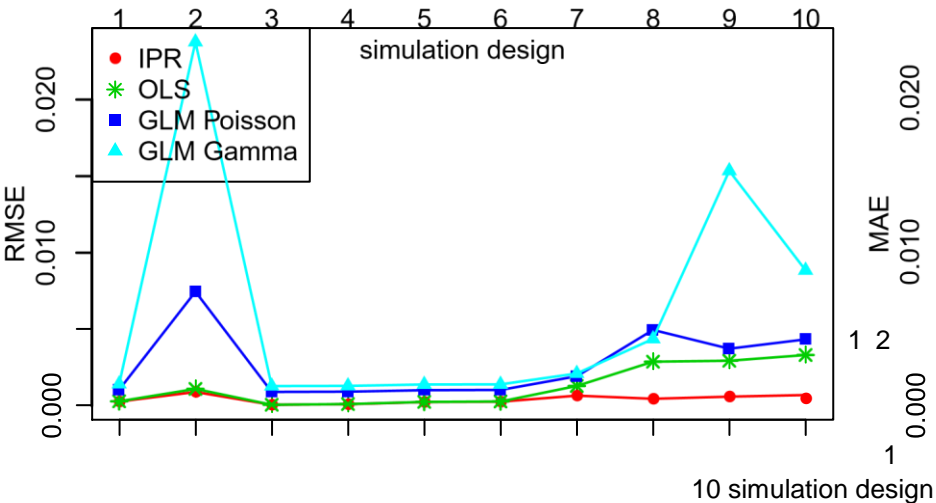

disease 43

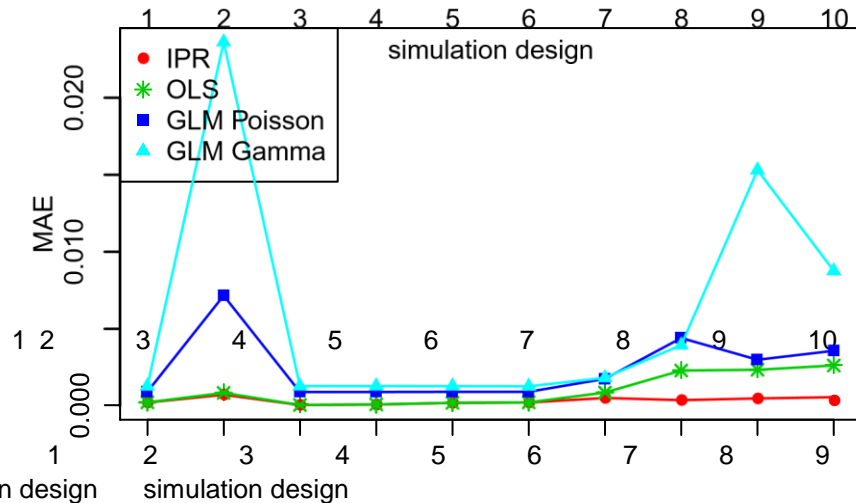

disease 44

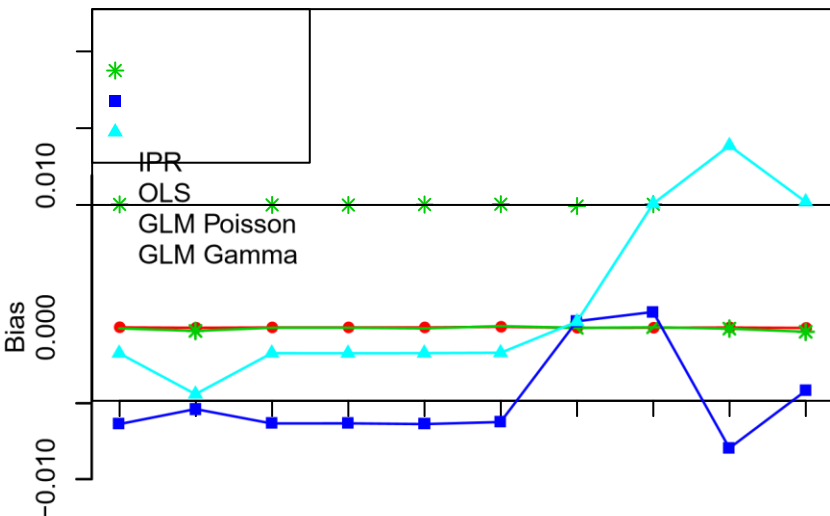

disease 44

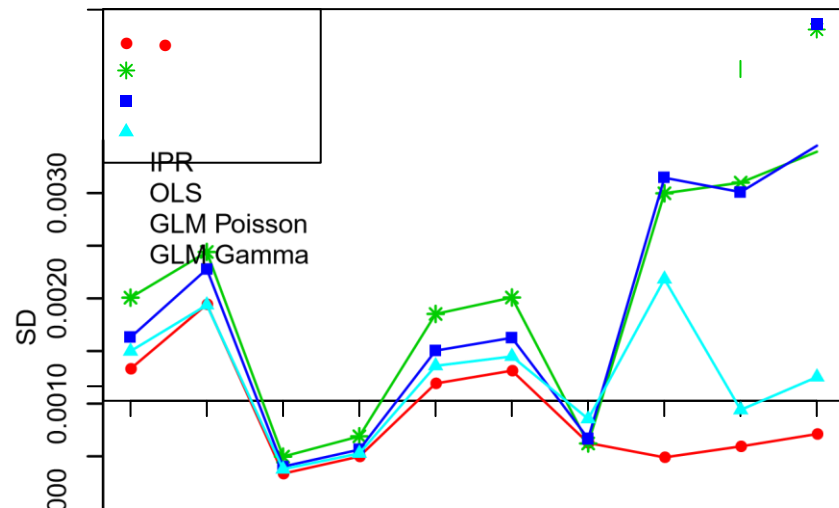

disease 44

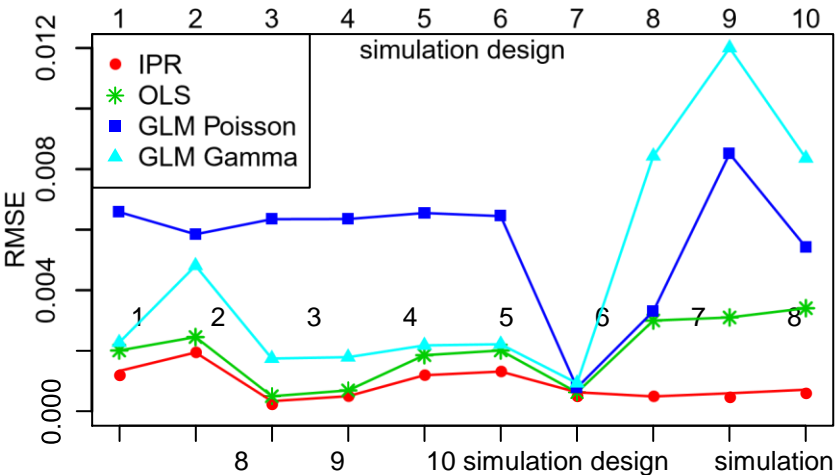

disease 44

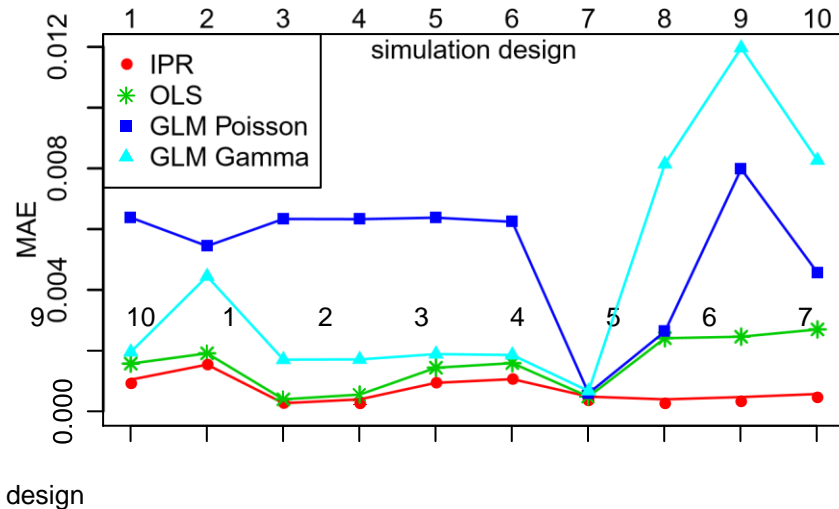



disease 45

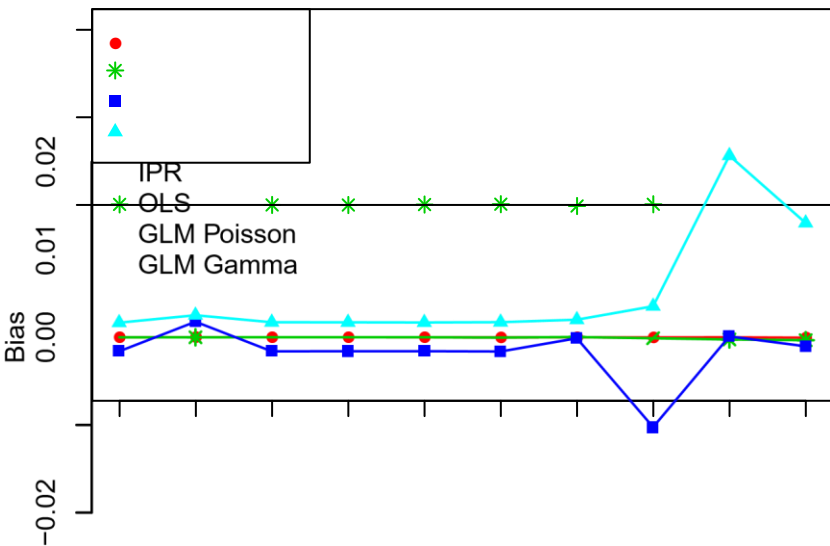

disease 45

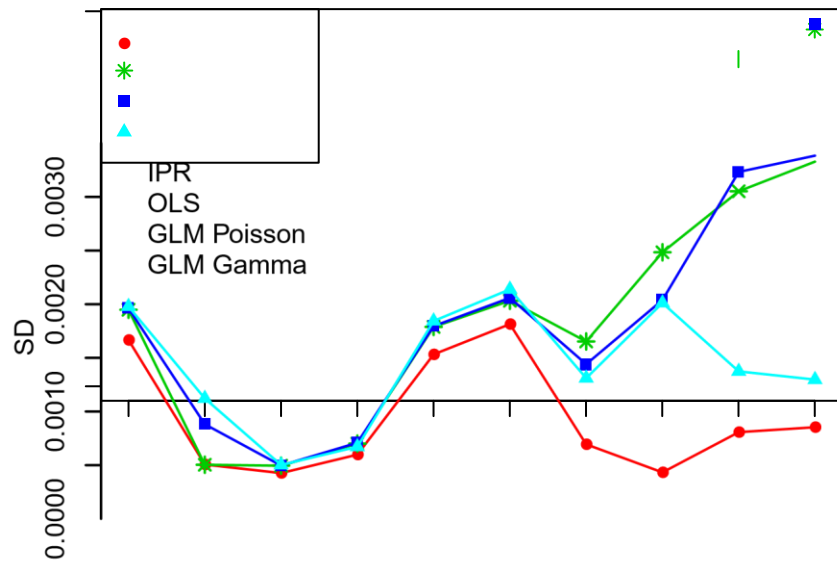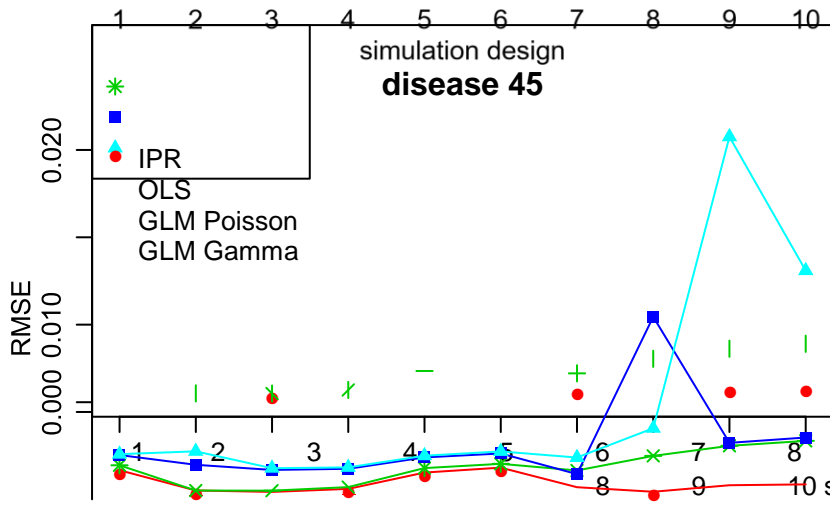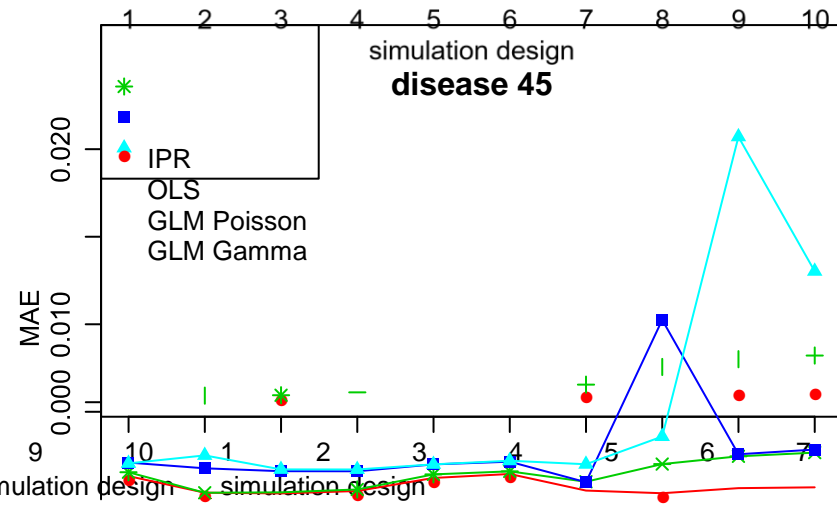

disease 46

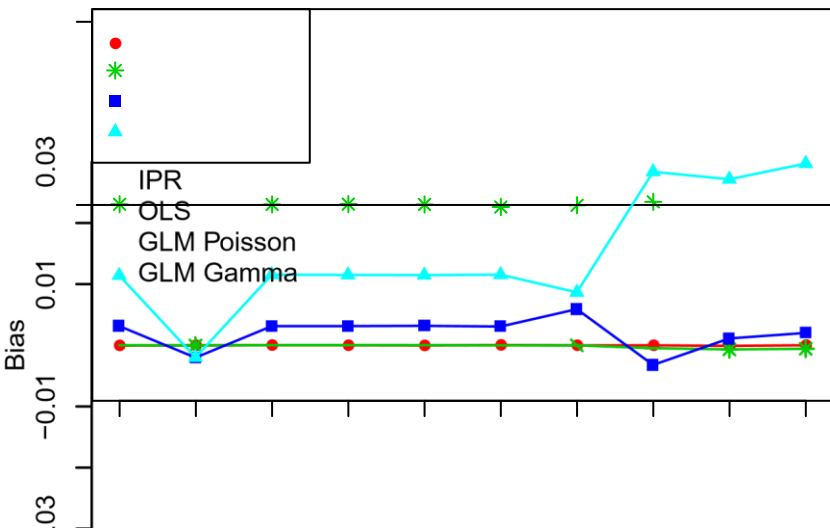

disease 46

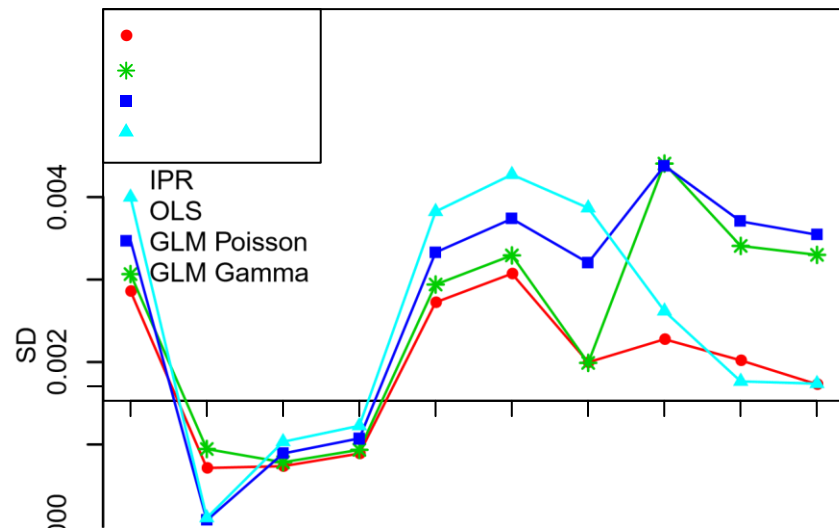

disease 46

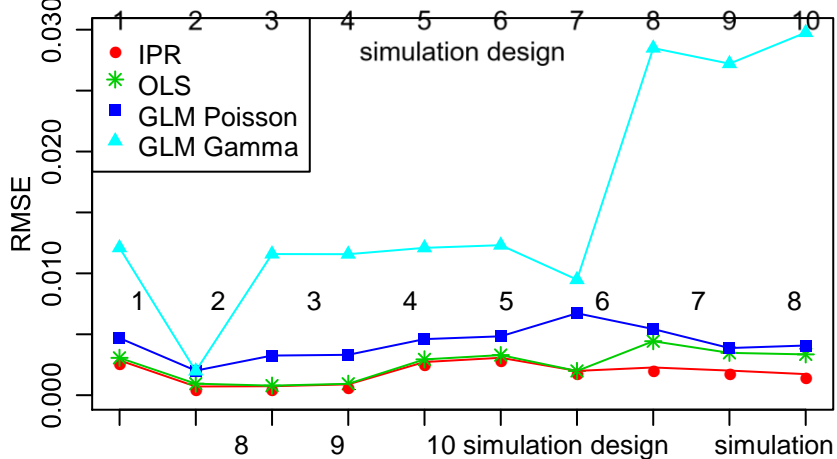

disease 46

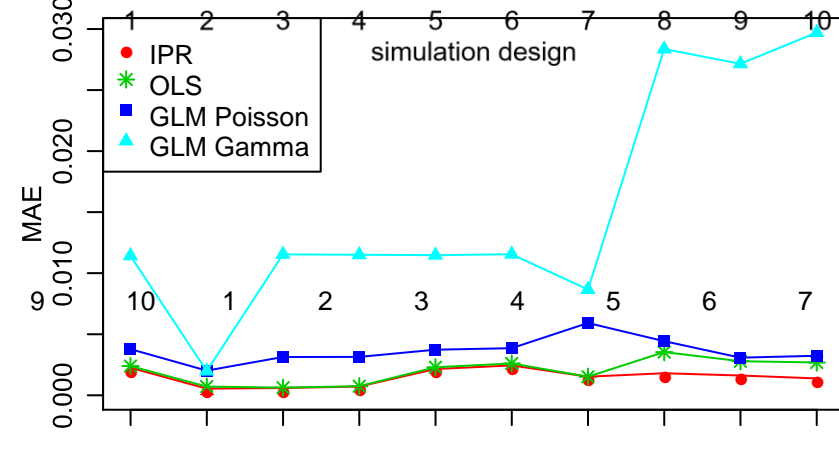

design

disease 47

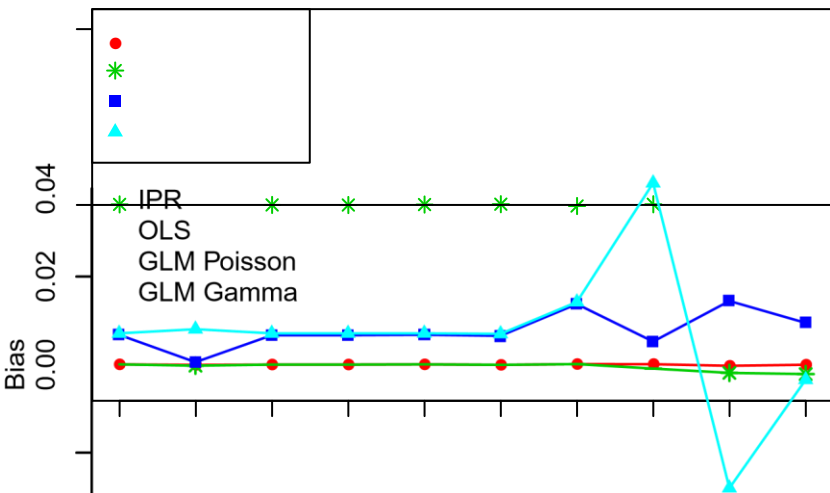

disease 47

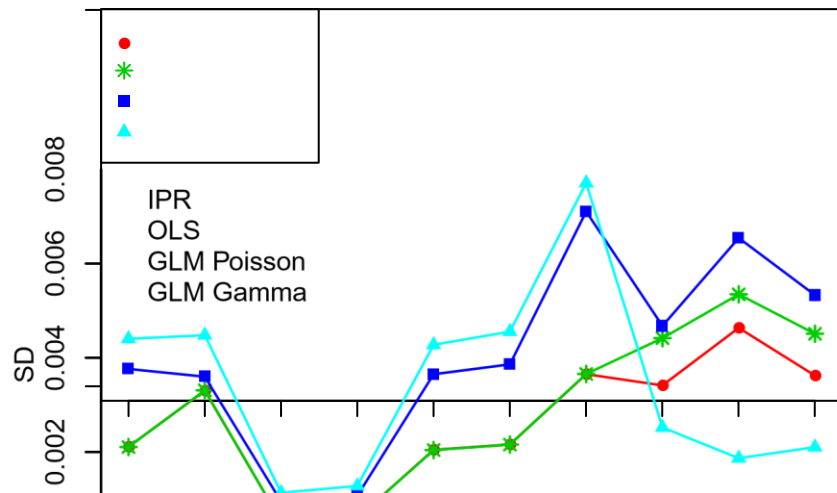

disease 47

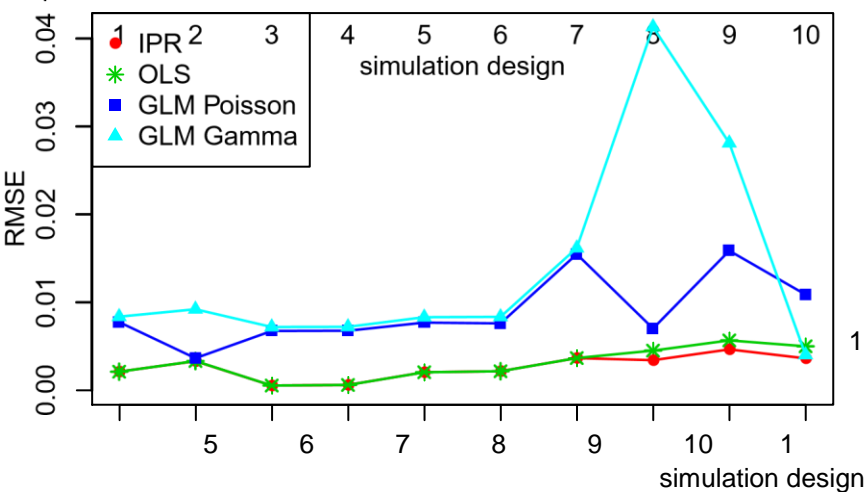

disease 47

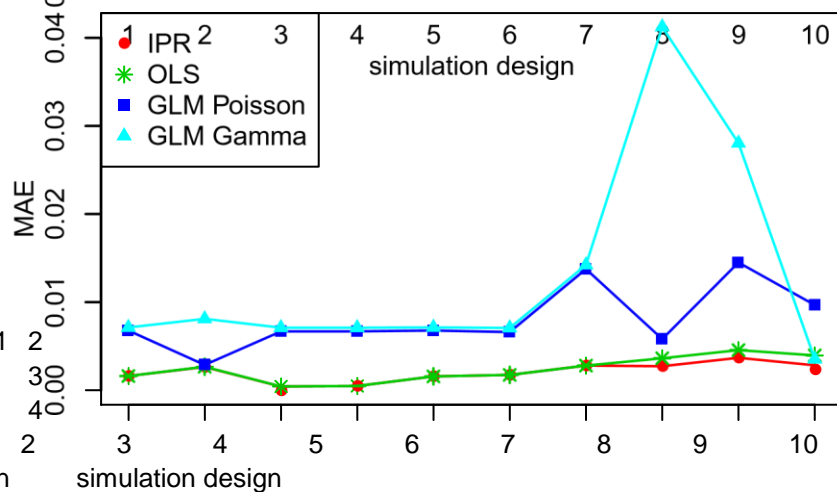

disease 48

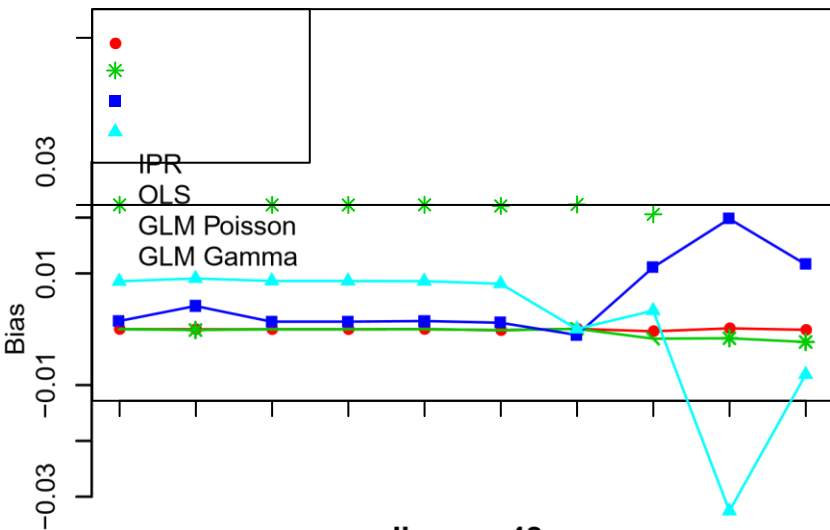

disease 48

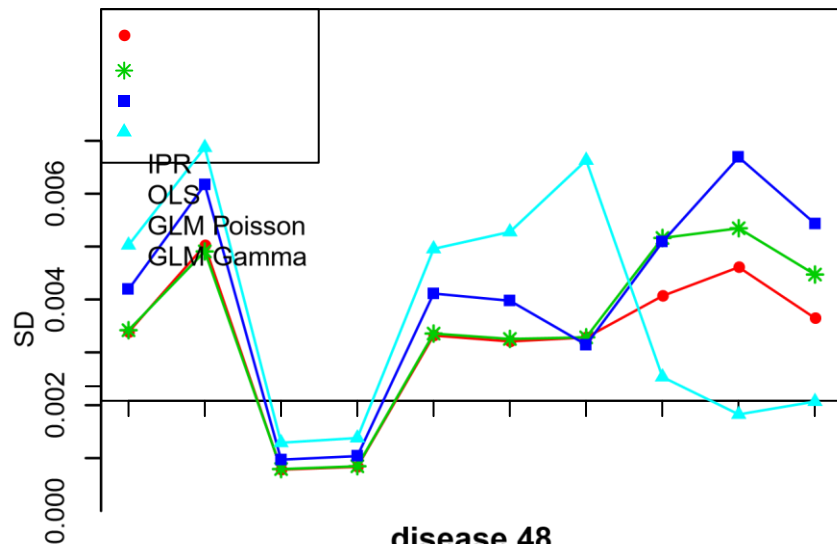

disease 48

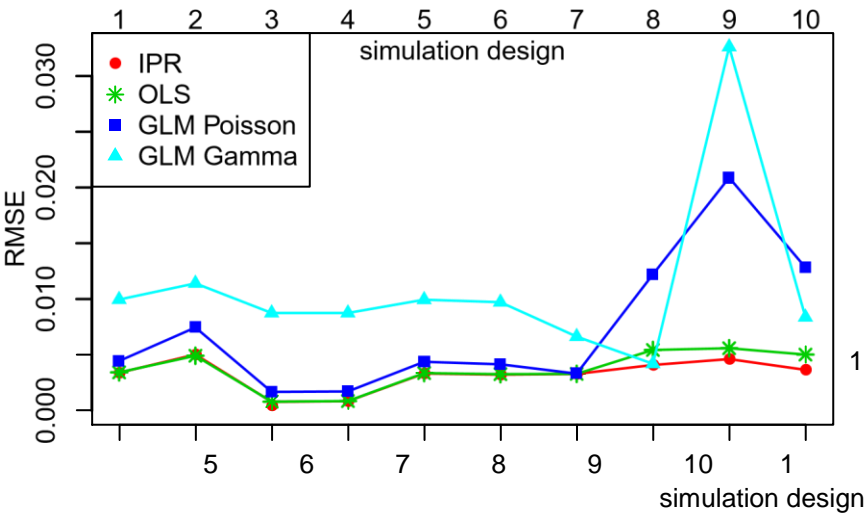

disease 48

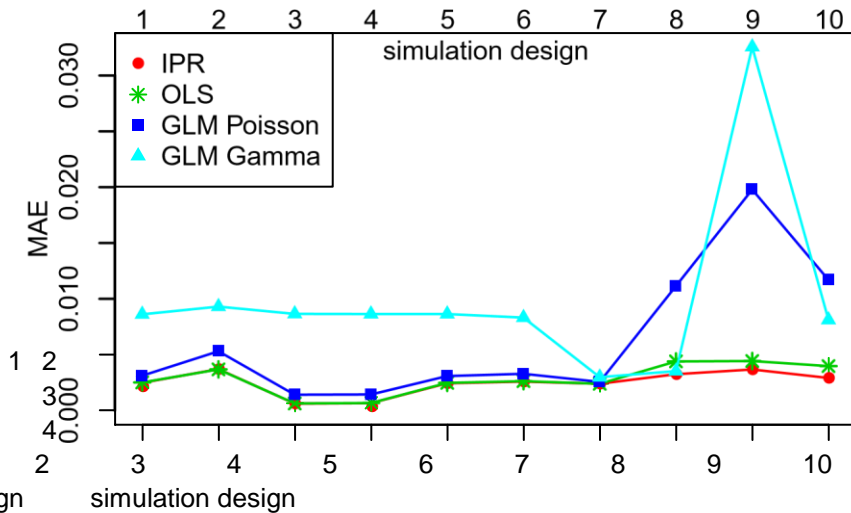

disease 49

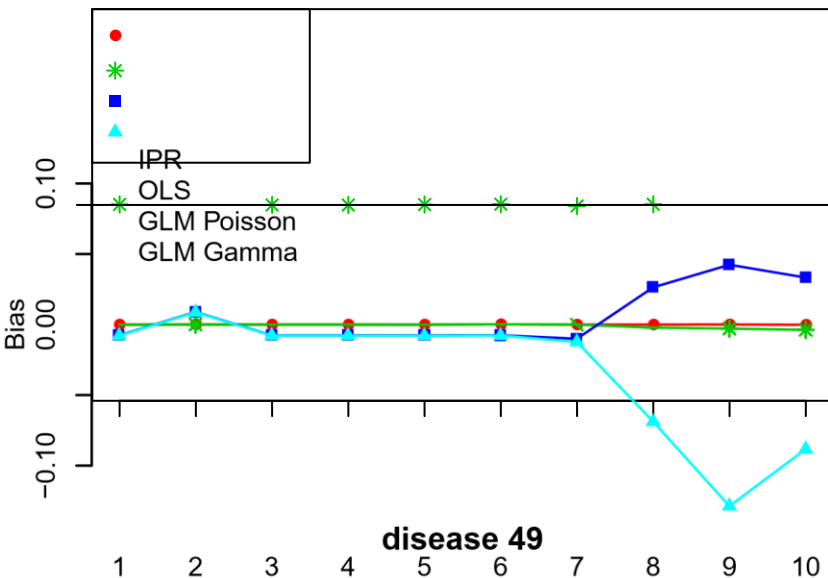

disease 49

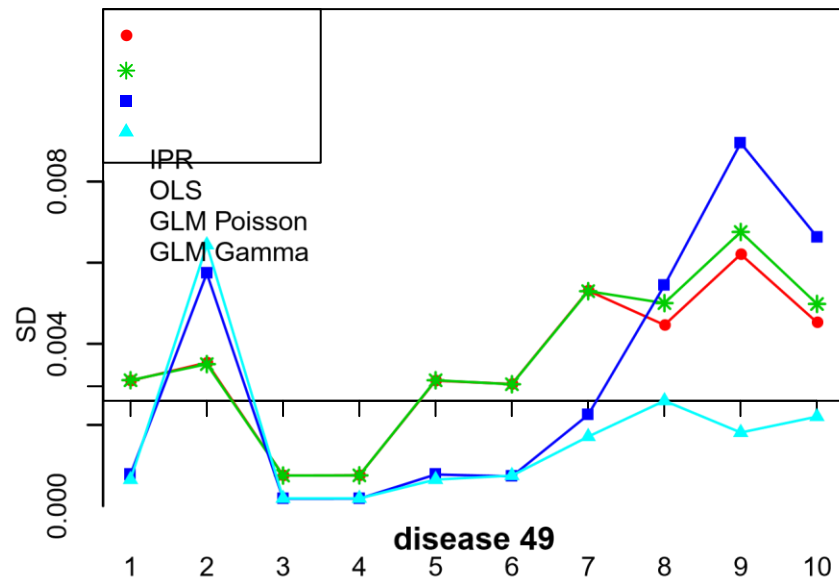

disease 49

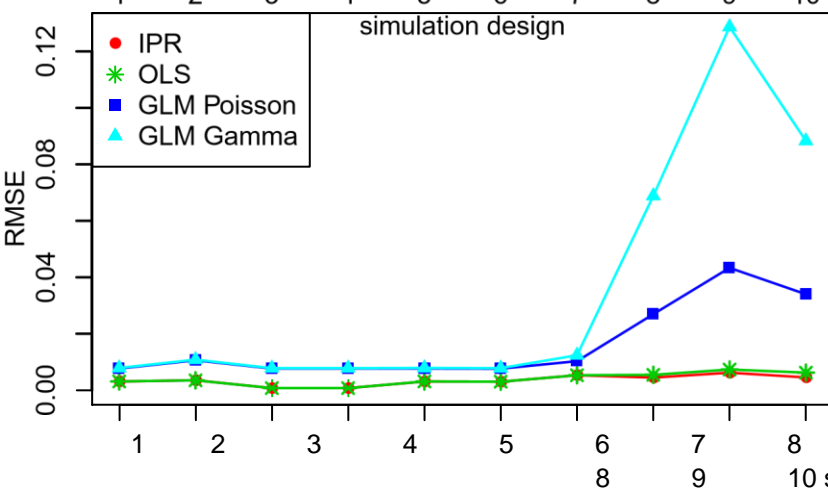

disease 49

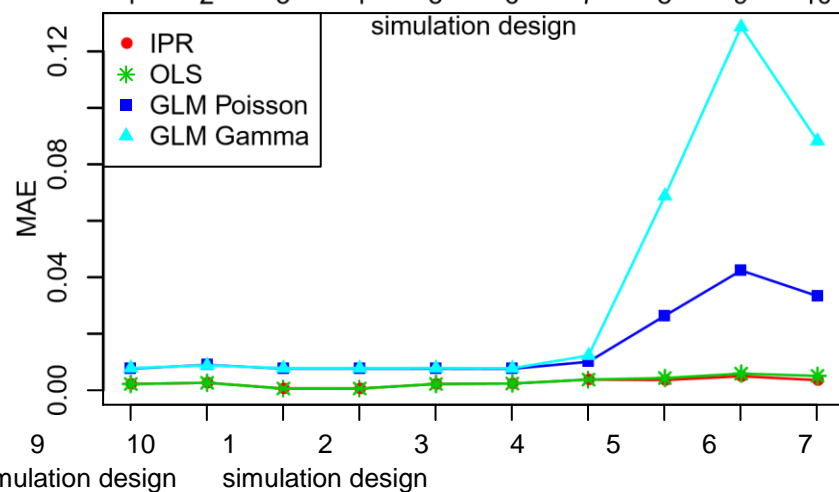

Supplement: Supplementary file 1 [file 20066132]
